# Supplementary material for: Genome-Wide Analysis of Coding and Non-coding RNA Reveals a Conserved miR164–NAC–mRNA Regulatory Pathway for Disease Defense in Populus
Source: Front Genet. 2021 May 28;12:668940. doi: 10.3389/fgene.2021.668940 (PMC8195341; doi:10.3389/fgene.2021.668940)
Supplement: Supplementary Data 3 — Known and novel miRNAs identified in this study. [file Data_Sheet_3.xlsx]

## Sheet: Sheet1
Supplementary Data 3 | Known and novel miRNAs identified in this study.
Known/Novel	miRNA family	miRNA mature	Mature sequence	LM	miRNA precursor	pre_seq	LP	mfe
Known	miR156	ptc-miR156a-5p	TGACAGAAGAGAGTGAGCAC	20	ptc-MIR156a	AAAGAAAGACTGACAGAAGAGAGTGAGCACACACGAAAGTATATGGTATGAAGGCATTCCATTGCAGGGTGTGTGCTCACATCTCTTCTGTCAGCTTCCAC	101	-54.7
Known	miR156	ptc-miR156b-5p	TGACAGAAGAGAGTGAGCAC	20	ptc-MIR156b	GTAAGGGAGGTGACAGAAGAGAGTGAGCACACAGGGTACTTTCTTGCATGACATCCATGCTTGAAACTTTGCGTGCTCACTCTCTATCTGTCACCCCACCA	101	-54.7
Known	miR156	ptc-miR156c-5p	TGACAGAAGAGAGTGAGCAC	20	ptc-MIR156c	CATTAGAAACTGACAGAAGAGAGTGAGCACACAGAGGCATATTTGTATAAATCTATACCATTGCTTTTGCGTGCTCACTTCTCATTCTGTCAGCTTCCAG	100	-49.2
Known	miR156	ptc-miR156d-5p	TGACAGAAGAGAGTGAGCAC	20	ptc-MIR156d	GTAAGTGAGTTGACAGAAGAGAGTGAGCACACAGGGTACTTTCTTGCATGACGTTCATGCTTGAAGCTTTGCGTGCCCACCCTCTATCTGTCACCCCATCA	101	-43.5
Known	miR156	ptc-miR156e-5p	TGACAGAAGAGAGTGAGCAC	20	ptc-MIR156e	CATTAGAAACTGACAGAAGAGAGTGAGCACACAGAGGCATATTTGTATAAATCTATACCATTGCTTTTGCGTGCTCACTTCTCATTCTGTCAGCTTCCAGA	101	-49.2
Known	miR156	ptc-miR156f-5p	TGACAGAAGAGAGTGAGCAC	20	ptc-MIR156f	AGAGAAAGACTGACAGAAGAGAGTGAGCACACACGAAAGCTAATTGTATGAAAGCATACCATTGCAGGGTGTGTGCTCACTTCTCTTCTGTCAGCTTACAT	101	-55
Known	miR156	ptc-miR156g-5p	TTGACAGAAGATAGAGAGC	19	ptc-MIR156g	GGTGATGTTGTTGACAGAAGATAGAGAGCACAGATGATGAAATGCATGGAGCTTAATTGCATCTCACTCCTTTGTGCTCTCTAGTCTTCTGTCATCACCTTCA	103	-50.3
Known	miR156	ptc-miR156h-5p	TTGACAGAAGATAGAGAGCACT	22	ptc-MIR156h	GGTGATGCTGTTGACAGAAGATAGAGAGCACTGACGATGAAATGCATGGAGCTTAATTGCATCTCACTCCTTTGTGCTCTCTAGTCTTCTGTCATCACCTTCA	103	-46.5
Known	miR156	ptc-miR156j-5p	TGACAGAAGATAGAGAGCAC	20	ptc-MIR156j	GGTGATGTTGTTGACAGAAGATAGAGAGCACAGATGATGATATGCAATGGACTCTGCATCCCACTCCTTTGTGCTCTCTATGCTTCTGTCATCACTTTCA	100	-45.9
Known	miR159	ptc-miR159a-3p	TTTGGATTGAAGGGAGCTCT	20	ptc-MIR159a	GATTAGGGAGTGGAGCTCCTTGAAGTCCAATAGAGGTTCTTGCTGGGTAGATTAAGCTGCTAAGCTATGGATCCACAGTCCTATCTATCAACCGAAGGATAGGTTTGCGGCTTGCATATCTCAGGAGCTTTATTGCCTAATGTTAGATCCCTTTTTGGATTGAAGGGAGCTCTAAACCCATAA	183	-77.1
Known	miR159	ptc-miR159b-3p	TTTGGATTGAAGGGAGCTCT	20	ptc-MIR159b	GATTATGGAGTGGAGCTCCTTGAAGTCCAATAGAAGCTCCTGCTGGGTAGATCGAGCTGCTGAGCTATGAATCCCACAGCCCTATCACCATCAGTCATTTTGATGGGCCTGCGGCTTGCATATCTCAGGAGCTTTATTACCTAATGTTAGATCTTTTTTTGGATTGAAGGGAGCTCTAAACCTTTGA	187	-76.4
Known	miR159	ptc-miR159c-3p	TTGGAGTGAAGGGAGCTCG	19	ptc-MIR159c	GAGGCTCAATGGAGCTCTCCCCACTCCATGCCTGAAAGGAGTTCGATGGTAGACCATGGCTGCTAGTTCATGAATACCCTTGGGTGCGCAGAATTAGCAACGGTGCAGGCGAAGTTGCGCAGGCTAAGGGTCTGCATGACCTAGGAGACGTGGTTACCCTGACCCTTTTTGTATTGGAGTGAAGGGAGCTCGATGGTCTTT	201	-94
Known	miR159	ptc-miR159d-3p	CTTGGATTGAAGGGAGCTCC	20	ptc-MIR159d	TTGTAAATTTGGGAGCTTTCTTTGGTTCAAAATGAGGAAAGAAAGTGGGTATACTCGTCTGCTTGTTCATGGATACCTCTGGGTTGCGCAGGATATATTAGTTAGGGCTACAGCTTAAGGGTTTGCATGGCCAAGGAGACGTTGCCTGCCTTCTCCTTTCGTTTCTTGGATTGAAGGGAGCTCCTACATGTATC	194	-75.4
Known	miR160	ptc-miR160a-5p	TGCCTGGCTCCCTGTATGCC	20	ptc-MIR160a	ACATGGGTTATGCCTGGCTCCCTGTATGCCACAAGCAAAGACCAATCTTTTGTTTTAGATTGGCTGTTGCCGGTGGCGTGCGAGGAGCCAAGCATACTCTCT	102	-56.3
Known	miR160	ptc-miR160d-5p	TGCCTGGCTCCCTGTATGCC	20	ptc-MIR160d	AAATGGGTTATGCCTGGCTCCCTGTATGCCACAGCAAAGACCAATCTCTTCTGTCTTAGATTGGCTGCTGCCGGTGGCGTGCGAGGAGCCAAGCATACTCTCT	103	-52.9
Known	miR160	ptc-miR160e-5p	TGCCTGGCTCCCTGAATGCC	20	ptc-MIR160e	AAGAATGGCCTGCCTGGCTCCCTGAATGCCATCTAGGAAGCTTGTCAAAGAGTGTTGGCAACCTTTCTATTTGGCATGAGGGGAGTCGAGCAGGCCAATT	100	-60.4
Known	miR160	ptc-miR160f-5p	TGCCTGGCTCCCTGAATGCC	20	ptc-MIR160f	AAGAATGGTCTGCCTGGCTCCCTGAATGCCATCTAGGAAGCTTGTCAAAGAGTGTTGGCAACCTCTCTAACTGGCATGAGGGGAGTCACGCAGGCCCAAC	100	-51.8
Known	miR162	ptc-miR162a-3p	TCGATAAACCTCTGCATCCAG	21	ptc-MIR162a	TGGGAAGACACTGGAGGCAGCGGTTCATCGATCTCTTCCTGGCCAATTTTTTGTTTAGCACGAAAAACATGAACCGATCGATAAACCTCTGCATCCAGCGCTTCCTT	107	-44.1
Known	miR162	ptc-miR162b-3p	TCGATAAACCTCTGCATCCAG	21	ptc-MIR162b	TGAGAAGACACTGGAGGCAGCGGTTCATCGATCTTTTCCTGAAGATTTTTTTGTTTTACACGAACAACACGAACCGATCGATAAACCTCTGCATCCAGTGCTTCCCT	107	-41.7
Known	miR164	ptc-miR164a-5p	TGGAGAAGCAGGGCACGTGCA	21	ptc-MIR164a	GGTTCCTTGCTGGAGAAGCAGGGCACGTGCAAAATCCTGATGAAGTGCTTACACTTTGCACGCGCTCTTCTTCTCCAACACGGGC	85	-37.3
Known	miR164	ptc-miR164b-5p	TGGAGAAGCAGGGCACGTGCA	21	ptc-MIR164b	GTGAGCAAGATGGAGAAGCAGGGCACGTGCACTACTAACTCATGCACACAGAGAGGGAGACGCATTTCTTGCTGGAGTTACGAGTTACGACTCTTACCTACTATTGATTTTGTTAGCTCCAGTGAGTTAGTTATTCATGTGCCTGTCTTCCTCATCATGATC	162	-53
Known	miR164	ptc-miR164c-5p	TGGAGAAGCAGGGCACGTGCA	21	ptc-MIR164c	TAGCTCTTGCTGGAGAAGCAGGGCACGTGCAAGCTCTCTCCTCAGGCTTTCCTTGCACGTGCTCCCCTTCTCCAACATGGGT	82	-41.5
Known	miR164	ptc-miR164d-5p	TGGAGAAGCAGGGCACGTGCA	21	ptc-MIR164d	TGGCTCACGCTGGAGAAGCAGGGCACGTGCAAAATCCTTCTCGGCTTCCAGATGCTGATGAAGCACTCTTTGCACGTGCTCCCCTCCTCCAACATGAGT	99	-47.1
Known	miR166	ptc-miR166a-3p	TCGGACCAGGCTTCATTCCCC	21	ptc-MIR166a	TTTCTTTTGAGGGGAATGTTGTCTGGCTCGAGGTCACTAATGGGATCTATGATTTTATCTCAATTGATTGATTTTCTTTTAAATTCTAGTAAATTGAATTGAGAGATATCATGATCAACTTATATTTAATGATGTCGGACCAGGCTTCATTCCCCCCAATTGTT	164	-54.5
Known	miR166	ptc-miR166b-3p	TCGGACCAGGCTTCATTCCCC	21	ptc-MIR166b	TAACTGTTGAGGGGATTGCTGTCTGGTTCGATGTCATTCATGTGAAGCTTTAACATTAATGTAGTATTGAGTGATTTCGGACCAGGCTTCATTCCCCCCAACTATA	106	-45.9
Known	miR166	ptc-miR166c-3p	TCGGACCAGGCTTCATTCCCC	21	ptc-MIR166c	CTTTTTTTGAGGGGAATGTTGTCTGGCTCGAGGACTCTTTCTTGATCAGTCTGATCAAGTGTTCTATCTTTAGATCTAATATCTTAGATCATGTGTTAGGGTCGTCGGACCAGGCTTCATTCCCCCCAATTATT	134	-56
Known	miR166	ptc-miR166d-3p	TCGGACCAGGCTTCATTCCCC	21	ptc-MIR166d	CGTGAGTTGAGGGGAATGTTGGCTGGCTCGAAGCTTAAGCAAAGAGTTTTCTCTCAAGAAACAACTGTTAAGGCTTCGGACCAGGCTTCATTCCCCTCAACCAAT	105	-52
Known	miR166	ptc-miR166e-3p	TCGGACCAGGCTTCATTCCCC	21	ptc-MIR166e	TAACTGTTGAGGGGATTGTCGTCTGGTTCGATGTCATTCATGAGAAGCTCAAACATAAACGTAATATTGAATGATTTCGGACCAGGCTTCATTCCCCCCAACAATG	106	-47.2
Known	miR166	ptc-miR166f-3p	TCGGACCAGGCTTCATTCCCC	21	ptc-MIR166f	GGTGTGTTGAGGGGAATGTTGGCTGGCTCGAAGCTTAAGCAAAGAGTTTCCTAACATGAAACAACTGTTAAGGCTTCGGACCAGGCTTCATTCCCCTCAAACATA	105	-53
Known	miR166	ptc-miR166g-3p	TCGGACCAGGCTTCATTCCCC	21	ptc-MIR166g	ACACAGTTGAGGGGAATGCTGTCTGGTTCGAGACCATTCACCTGAAGCGCACGCATTCATCTTTTGAGTGATCTCGGACCAGGCTTCATTCCCCCCAACTCAA	103	-54.1
Known	miR166	ptc-miR166h-3p	TCGGACCAGGCTTCATTCCCC	21	ptc-MIR166h	ACACAGTTGAGGGGAATGCTGTCTGATTCGAGACCATTCACTTTAAGCACACATTCATCTTTCGAATGATCTCGGACCAGGCTTCATTCCCCCCAACTCAA	101	-41.7
Known	miR166	ptc-miR166i-3p	TCGGACCAGGCTTCATTCCCC	21	ptc-MIR166i	TGTCTTTTGAGGGGAATGTTGTTTGGTTCAAGGCCTGGCCACCCCATGTCTTGGAATTTAAAATATCATGTCCTCGGACCAGGCTTCATTCCCCTCAATTACT	103	-40.5
Known	miR166	ptc-miR166j-3p	TCGGACCAGGCTTCATTCCCC	21	ptc-MIR166j	TCTTTTTTGAGGGGAATGTTGTCTGGCTCGAGGACTTTTTGTTCATCAATCTAATCGAACTTTCTACCTGTAGATCTAGTATCTTATTTAAGATTGATCACGTATTAGGGTTGTCGGACCAGGCTTCATTCCCCCCAATCATT	143	-46.8
Known	miR166	ptc-miR166k-3p	TCGGACCAGGCTTCATTCCCC	21	ptc-MIR166k	TCTTTTTTGAGGGGAATGTTGTCTGGCTCGAGGACTTTTTGTTCATCAATCTAATCGAACTTTCTACCTGTAGATCTAGTATCTTATTTAAGATTGATCACGTATTAGGGTTGTCGGACCAGGCTTCATTCCCCCCAATCATT	143	-46.8
Known	miR166	ptc-miR166l-3p	TCGGACCAGGCTTCATTCCCC	21	ptc-MIR166l	TAACTTTTGTGGTGAATGTTGTCTGGTTCAAGGCATGGCCACCACATCTCTTGGTGAATATATGTCCTCGGACCAGGCTTCATTCCCCTCAATTAAT	97	-38.7
Known	miR166	ptc-miR166m-3p	TCGGACCAGGCTTCATTCCCC	21	ptc-MIR166m	TGAGGATGTGGGGGAATGTCGTCTGACTCGAGACAACAGGTAAACTGAAGGAATGGCCGGAGTTTAAGAGTTCTCTCGGACCAGGCTTCATTCCCCTCATCCACA	105	-47.2
Known	miR166	ptc-miR166p-3p	TCGGACCAGGCTCCATTCCTT	21	ptc-MIR166p	TAAGGTTGAGAGGAACGCTGTCTGGGTCGAGGTCATGGAGGCCATGATTATACATAAATGGCATTATCTGATGACAGCCCAGATAATCGATGCACCTGTCTTGAACCTAAATGATTCTCGGACCAGGCTCCATTCCTTCCAACCAT	146	-51.4
Known	miR166	ptc-miR166q-3p	TCGGACCAGGCTTCATTCCTT	21	ptc-MIR166q	TTAGGTTGAGAGGAATGTTGTCTGGCTCGAGGTCATTGAGGCCATGATTATACAGACATGGCATTACCTGATGACAGCCGAGAAAATTCAAAGTCTGTGTGTATCTTGTACCTCGATGATTCTCGGACCAGGCTTCATTCCTTCCAACAAA	151	-64.2
Known	miR167	ptc-miR167a-5p	TGAAGCTGCCAGCATGATCT	20	ptc-MIR167a	CACTAGCAGTTGAAGCTGCCAGCATGATCTAACTTCCTTGCTTCTTTATCAAGGATGGATTTAGATCATGTGGTGGTTTCACCTGTTGA	89	-40.2
Known	miR167	ptc-miR167b-5p	TGAAGCTGCCAGCATGATCT	20	ptc-MIR167b	AGGGAAAAAGTGAAGCTGCCAGCATGATCTATCTTTGGTTAGAGAAAGAAAGGACTAACCCTAGCTAGGTCATGCTGTGACAGCCTCACTCCTTCC	96	-44.2
Known	miR167	ptc-miR167c-5p	TGAAGCTGCCAGCATGATCT	20	ptc-MIR167c	CACTAGCAGTTGAAGCTGCCAGCATGATCTAAATTAACCTCCTTCTTTATCAAGGATGGATTAGATCATGTGGTAGTTTCACCTGCTGA	89	-42.8
Known	miR167	ptc-miR167d-5p	TGAAGCTGCCAGCATGATCT	20	ptc-MIR167d	AGGGAAAAGGTGAAGCTGCCAGCATGATCTATCTTTGGTTAGAGAAGGATAGAAGCGAAAGAACTAACCCTAGCTAGGTCATGCTCTGACAGCCTCACTCCTTCC	105	-38.6
Known	miR167	ptc-miR167f-5p	TGAAGCTGCCAGCATGATCT	20	ptc-MIR167f	CTCTATCAGTTGAAGCTGCCAGCATGATCTTAGCCTTCCTCCTTTGTTGAGGAAAGAAACAGATCATGTGGCAGTTTCACCTGTTGT	87	-39
Known	miR167	ptc-miR167g-5p	TGAAGCTGCCAGCATGATCT	20	ptc-MIR167g	CACTATCAGTTGAAGCTGCCAGCATGATCTTAACCTCCCTCCTTTGTCGAGGAAAGAACAGATCATGTGGCAGTTTCACCTGAAGT	86	-39.1
Known	miR167	ptc-miR167h-5p	AAGCTGCCAACATGATCTGAGC	22	ptc-MIR167h	CGCTATTAGTTGAAGCTGCCAACATGATCTGAGCTTTCCTTAATTTTCCTATACAGGAAAGACTAGATCATGTGGCAGTTTCACCTATTGA	91	-41.2
Known	miR169a	ptc-miR169aa-3p	CCAGGTCGTTCTTGGCTCAACT	22	ptc-MIR169aa	GTAGAGATCGAGCCAAGAATGACTTGTCGGCAGGCTAGCAATTGCTACGTATAGAGCAATATGTATGCTAGAATGAGTATTCCGCCAGGTCGTTCTTGGCTCAACTTTG	109	-48.1
Known	miR169a	ptc-miR169ac-5p	TAGCCAAGGACGACTTGCCC	20	ptc-MIR169ac	TCTTGTTTGTAGCCAAGGACGACTTGCCCACAATATGTATCGTGAGCGTTTCCAATTTGCAACCTCATACTTGGTTGTTTTGGGCAGTCTCCTTGGCTATGCAGAT	106	-41.6
Known	miR169a	ptc-miR169ad-5p	TAGCCAAGGACGACTTGCCC	20	ptc-MIR169ad	GTTGTTCGGTAGCCAAGGACGACTTGCCCACACTATGAGACAAGTGGTTAGAATTAGCAACTTCTTAATTGGTTATGGGAAGTCTCCTTGGCTATGCTGAC	101	-40.8
Known	miR169a	ptc-miR169ae-5p	TAGCCAAGGACGACTTGCCC	20	ptc-MIR169ae	CTTGTTTGGTAGCCAAGGACGACTTGCCCACCACCATCTTAGTTGGGTCCAATATATTACTGGGCACCTTCCATTTGGTTTTGGGCAAGCACCTTGGCTAGCTGACA	107	-47.4
Known	miR169a	ptc-miR169af-5p	TAGCCAAGGACGACTTGCCC	20	ptc-MIR169af	CTTGTTTGGTAGCCAAGGACGACTTGCCCACCACCATCTCAGTTGGGTCCAATATATTACTGGGCACCTTCCATTTGGTTTTGGGCAAGCACCTTGGCTAGTTGACA	107	-45.9
Known	miR169	ptc-miR169i-5p	TAGCCAAGGATGACTTGCCTG	21	ptc-MIR169i	TCTTGTTTGGTAGCCAAGGATGACTTGCCTGCTCCATTGTAGGAGGTTTCCGAAAAAATGCAGACATGTATAATTTCGAAACCCCTGTTTCGTTTCAGGCAGTCTCCTTGGCTAACTTGACTG	123	-52.6
Known	miR169	ptc-miR169j-5p	TAGCCAAGGATGACTTGCCTG	21	ptc-MIR169j	TCTTGTTTGATAGCCAAGGATGACTTGCCTGCTACTTGCAAGAGTTTCTGCAAAGAGATCAGAACCAAATATGCATGGAATTATATGTAATGAAACTCTTGTTTGATTGCCAGGCAGTCTCCTTGGCTAGCCTGACA	137	-50
Known	miR169	ptc-miR169k-5p	TAGCCAAGGATGACTTGCCTG	21	ptc-MIR169k	TCTTGTTTGGTAGCCAAGGATGACTTGCCTGTAGCCTCCCTCGGATTCATGAACACGAGCATTTATGTGGTGCTCAAAAGAAAAGGAGAGAATGATCCCAGCTGGCAGCGACAAGGTCAATCCATTGAAGTAGCGAGAAGCAGGTGATTTATAGCTAGAATCCACAAGAGGTTCCCAGCAAGTGTCCTTGGCTAACGAGACGG	203	-71
Known	miR169	ptc-miR169l-5p	TAGCCAAGGATGACTTGCCTG	21	ptc-MIR169l	TCTTGTTTGATAGCCAAGGATGACTTGCCTGCTACATACAAGAGATCATTATGCATAAATAGAACGAAATATGTACATGGTATTAATTAATGCAGTGAAAACTCTTGTTTGGTTGCCAGGCAGTCTCCTTGGCTAAGCTGACA	143	-49.9
Known	miR169	ptc-miR169m-5p	TAGCCAAGGATGACTTGCCTG	21	ptc-MIR169m	TCTTGTTTGGTAGCCAAGGATGACTTGCCTGCTCCCTTCAAGGAGGTTTCATGAAATGCAGACATGATCTCTCGAAACCCCTGTTGGGTTTCAGGCGGTCTCCTTGGCTAACTTGACAG	119	-54
Known	miR169	ptc-miR169q-5p	TAGCCAAGGACGACTTGCCTGT	22	ptc-MIR169q	TCTTGTTAGTTAGCCAAGGACGACTTGCCTGTTCCTAGCAATTTGGGATTTGCCCTGGACTAAGAGGCAGGACCCTCATTCCGGGTTTCAGGCAGTCTCCTTGGCTAGGTTGACA	115	-53.3
Known	miR169	ptc-miR169u-5p	TAGCCAAGGACGACTTGCCT	20	ptc-MIR169u	GAGGGTTGGGTAGCCAAGGACGACTTGCCTATTTCCTCCATGGGGTCCTGAAAAGAATGAAATACTGTCGTTCAGAGCTCATTGGTAGGGTTCATAGGCAGTCTCCTTTGGCTATCCTAACT	122	-56.4
Known	miR171	ptc-miR171c-5p	CGATGTTGGTGAGGTTCAATC	21	ptc-MIR171c	AAAAGAAAGCGATGTTGGTGAGGTTCAATCCGAAGACGGATTTACACGTGAAAGTAATTGTAAAATACGATCTCAGATTGAGCCGCGCCAATATCACTTTCTCA	104	-42.9
Known	miR171	ptc-miR171d-5p	CGATGTTGGTGAGGTTCAATC	21	ptc-MIR171d	AAAAGAAAGCGATGTTGGTGAGGTTCAATCCGAAGACGGATTTACACGTGAAAGTAATTGTAAAATACGATCTCAGATTGAGCCGCGCCAATATCACTTTCTCAG	105	-42.9
Known	miR171	ptc-miR171i-5p	TATTGGCCTGGTTCACTCAGA	21	ptc-MIR171i	GAGTGACTATGATATTGGCCTGGTTCACTCAGATCACGACTTCAGAGCAAAGTGTCTTTCTTCTTCTTCTTTTTCTTCTTCTTCTTGTTTTATGTTCGTTTGATTTGATTGAGCCGTGCCAATATCTCAGTACTC	135	-42.67
Known	miR171	ptc-miR171l-5p	TGTGATATTGGTCCGGCTCATC	22	ptc-MIR171l	GGAGAAGTAGACACGGTGTGATATTGGTCCGGCTCATCTTCTGTGCATAAGCATCTGAAGTTCTTCACTCATGAAGACGAGCCGAATCAATATCACTCTTGTATGCTTCTTC	112	-49.9
Known	miR172	ptc-miR172a-3p	AGAATCTTGATGATGCTGCAT	21	ptc-MIR172a	TTGTTTGCAGGTGCAGCATCATCAAGATTCACATTCAAATAGATGTACCGAAGCTATACAGCTATGTAGCTAGCTAGCAATGTATAATCATTGTAGGTGAGAATCTTGATGATGCTGCATCAGCCATAA	129	-54.1
Known	miR172	ptc-miR172c-3p	AGAATCTTGATGATGCTGCAT	21	ptc-MIR172c	TTGTTTGCAGGTGCAGCATCATCAAGATTCACATTCAAACAGATGTACGGCAGCTAGCTAGCTAGATAGATAGACAGCAATGTATTTCTTTGAAGGTGAGAATCTTGATGATGCTGCATCAGCCATAA	128	-54.1
Known	miR172	ptc-miR172f-3p	AGAATCTTGATGATGCTGCAT	21	ptc-MIR172f	TTGTTTGCGGGTGCTGCATCACCAAGATTCACATGCAAATGCATGGCCGATGATATATGTTAGAAATTTTTTTTATATAAAAAAGATATCTTTCTTTCTTTCTGATCATCTGCCAAAGTTCTTTGGAAGTGAGAATCTTGATGATGCTGCATCGGCAATAA	161	-55.2
Known	miR319	ptc-miR319a-3p	TTGGACTGAAGGGAGCTCCC	20	ptc-MIR319a	TAATAGCTAAGAGAGCTTTCTTCAGTCCACTCATGGGTGGTAGTAGGATTTAATTAGCTGCCGACTCATTCATCCAAATACTGAGTTAAAGGACAAGGAGATTACCCAGTAAATGAGTGAATGATGCGGGAGACAAATTGAATCCTAAGCTTCCTGTACTTGGACTGAAGGGAGCTCCCTTTCCTTTT	188	-76.7
Known	miR319	ptc-miR319b-3p	TTGGACTGAAGGGAGCTCCC	20	ptc-MIR319b	TAATAGATAAGAGAGCTTTTTTCGGTCCACTTATAGATAGTAATATGATTTAATTAGTTACCGACTCATTCATCCAAATACTGAGTTATGAGCTAAGATTACCCAGTAAATGAATGAGTGATGCGGGAGACAAATTAAATCTTAAACTTCCTATCATTGGACTGAAGGGAGCTCCCTTTACTGTT	185	-66.6
Known	miR319	ptc-miR319e-3p	TTGGACTGAAGGGAGCTCCT	20	ptc-MIR319e	GGAGGGGCTGAGGTGCTCCTTTTAGTCCAATACGGAGGGCTGAGAAGCGGCTAGAGCTGCCATCTCATGCATTTAGGCAATGCTTAACATTTGACGAAGAGAGGTTAAGCTTGGCCACTTGCATGGTGTGGGAGCAACTCCTTCCGCATGCTTTGCTCGCCCATTGGACTGAAGGGAGCTCCTGGTTTTACC	192	-89
Known	miR319	ptc-miR319f-3p	TTGGACTGAAGGGAGCTCCTTC	22	ptc-MIR319f	TAATGGTGGGAGAGAGCTTCCTTCAGCCCACTCATGGATAGGAGAAAGGGGTTGAATTAGCTGCCGACTCATTCATTCAAGCACCAGTAGAAAAAGGGGAATGGATATTCTTTTGCTACTGTGATTGTGTGAATGATGCGGGAGATAATTTTACATCCCCTCTTTTTCTGTGCTTGGACTGAAGGGAGCTCCTTCCTTCTAT	202	-90.7
Known	miR319	ptc-miR319g-3p	TTGGACTGAAGGGAGCTCCTTC	22	ptc-MIR319g	TAATCGTGGGAGAGAGCTTCTTTCAGCCCACTCGTGGATAGGACAAAGGGGTTGAACTAGCTGCCGACTCATTCATTCAAGCACTAGTAGAAAAAAAGGCGAACGGTGTTTCTTTTGCTACTGTGATTGTGTGAATGATGCGGGAGATAATTTTCCATCCTCTCCTTTTCTGTGCTTGGACTGAAGGGAGCTCCTTCCTTCTCT	204	-77.8
Known	miR319	ptc-miR319h-3p	TTGGACTGAAGGGAGCTCCT	20	ptc-MIR319h	TTGTAGGGGCTAAAGTGCTCCTTTTAGTCCAATAAGGAGGGCTGAGAAGCGGCTAGAGCTGCCATCTCATGCATTTAGGCAATGCTTAACATTTGGCAAAGAGGTTTAAGCTTGGCCAGGTGCATGGTGTGGGAGCAACTCCTTCCGCATGCTTTGTTCGCCCATTGGACTGAAGGGAGCTCCTGGTTTTACCAC	195	-81.4
Known	miR319	ptc-miR319i-3p	TTTGGGCTGAAGGGAGCTCC	20	ptc-MIR319i	GTGCAGAAATGGAGGTTCCTTCCAGCCTCAAGCATCTTTAAGATGGTGGCGATGTCTATTTTGGGCTGAAGGGAGCTCCCAATTCTTCT	89	-32.1
Known	miR3627	ptc-miR3627a-5p	TTCTGTCGCTGGAAAGATGGT	21	ptc-MIR3627a	GGTTTGGGGAGGGGAGTTCTGTCGCTGGAAAGATGGTACCTAGGGCTGCATATTAATGTGTATAGCAAGCAATAGGCACCATCTTCCCGCGACGGAACTCCCCTCTAACCTCTACC	116	-70.1
Known	miR390	ptc-miR390a-5p	AAGCTCAGGAGGGATAGCGCC	21	ptc-MIR390a	AGAATCTGTTAAGCTCAGGAGGGATAGCGCCATGAGCATGACAAAGTCTATGTTTGAGTTAATCTCAACAAAATCAATCCAGTCATCAGTGGCGCTATCTATCCTGAGTTCTATGGGTT	119	-48.7
Known	miR390	ptc-miR390b-5p	AAGCTCAGGAGGGATAGCGCC	21	ptc-MIR390b	AGAATCTGTTAAGCTCAGGAGGGATAGCGCCCTAAGGATAATCATGGGCTCTTTTTATGTGGTTTTTGATTCTCAGTGGCGCTATCCATCCTGAGTTTCATTGCTT	106	-42.6
Known	miR390	ptc-miR390c-5p	AAGCTCAGGAGGGATAGCGCC	21	ptc-MIR390c	AGGATCTGTTAAGCTCAGGAGGGATAGCGCCATGAGCTGATGATAAGTTGATGTTTGATGGGTTAATCTCAACATAATCAATCTAGTCATTAGTGGCGCTATCTATCCTGAGTTCTATAGGTT	123	-59
Known	miR390	ptc-miR390d-5p	AAGCTCAGGAGGGATAGCGCC	21	ptc-MIR390d	AGAATCTGTTAAGCTCAGGAGGGATAGCGCCCTAAGGATAACCATGGGCTCTTTTTATTTGGTTTTTGACTATCAGTGGCGCTATCCATCCTGAGTTTTACTGGTT	106	-44.3
Known	miR393	ptc-miR393a-5p	TCCAAAGGGATCGCATTGAT	20	ptc-MIR393a	AGAGGAGGCATCCAAAGGGATCGCATTGATCCCAAGTGTCTGTCCCCCATAATTTTGGATCATGCTATCCCTTTGGATTCCTCCT	85	-44
Known	miR393	ptc-miR393b-5p	TCCAAAGGGATCGCATTGAT	20	ptc-MIR393b	AGAGGAGGCATCCAAAGGGATCGCATTGATCCCGAGTGTCCCTGGCCATAATTTTGGATCATGCTATCCCTTTGGATTCCTCCT	84	-44.5
Known	miR393	ptc-miR393c-5p	TCCAAAGGGATCGCATTGATC	21	ptc-MIR393c	GCTGGAGTGTTCCAAAGGGATCGCATTGATCTAATGACTCTCGATGTCTAAATCATATTAATGTTTAGTTTTTTCGTTGGATCATGCGATCCCTTAGGAATTTTCCA	107	-47.6
Known	miR394	ptc-miR394a-3p	AGCTCTGTTGGTCTCTCTTTG	21	ptc-MIR394a	TCATGTGGGTTTTGCAAAGGGTTTCTTACAGAGTTTTTTGGCATTCTGTCCACCTCCATCTGTAGAAACTACAAGTTGTTCTACTTTCTGGAGGTGGGCATACTGCCAACTGAGCTCTGTTGGTCTCTCTTTGTAAAACCCTCGTGA	147	-47.6
Known	miR394	ptc-miR394b-3p	AGCTCTGTTGGTCTCTCTTTG	21	ptc-MIR394b	TCATGTGGATTTAGCAAAGGGTTTCTTACAGAGTTTATTGGCATTCTGTCCACCTCCTATCTTTAGAAATTAGAATATCTCTTTCATATGGAGGTGGGCATACTGCCAACCGAGCTCTGTTGGTCTCTCTTTGTAAAACCCTCGTGA	147	-79.6
Known	miR395	ptc-miR395a-3p	TGAAGGGTTTGGAGGAACT	19	ptc-MIR395a	GGTCACCCTGAGTTCCTCCTAGCTTCTTCAGTACCCGTGGAAAGCTAATGCTACAATTATCTTGAGCTGGTAAGACTGGCAGGTGTCAGATGTGGATGTGTTAAAGGTAATATTATTGATTATTTACGGCGCCATTCAAGTATTTGTTCTACTGTTAGAGGATTTAATCAAGTATATGTGGTATTACTCCTGATTTGCTGAAGGGTTTGGAGGAACTCTAGGTGCT	226	-79.1
Known	miR395	ptc-miR395b-3p	CTGAAGTGTTTGGGGGAACTC	21	ptc-MIR395b	GTGTCCCCTAGAGTTCCCTTGAGCACTTCACTGGGACCCTTCAGACCGAAAGAGTATTATCTTTCCCACTGAAGTGTTTGGGGGAACTCCTGGTGTCA	98	-44.1
Known	miR395	ptc-miR395e-3p	CTGAAGTGTTTGGGGGAACTC	21	ptc-MIR395e	CTGTCCCCCGGAGTTTCCCTGACCACTTCACTGGGGCTATAATTCTACTCTTCGTGTTTAAGGGTAGAGGCAACCCTTCCTCACTGAAGTGTTTGGGGGAACTCTGGGTGGCA	113	-57.8
Known	miR395	ptc-miR395f-3p	CTGAAGTGTTTGGGGGAACTC	21	ptc-MIR395f	CTGTCCCCCGGAGTTTCCCTGACCACTTCACTGGGGCTATAATTCTACTCTTCGTGTTTAAGGGTAGAGGCAACCCTTCCTCACTGAAGTGTTTGGGGGAACTCTGGGTGGCA	113	-57.8
Known	miR395	ptc-miR395k-3p	CTGAAGTGTTTGGGGGAACTC	21	ptc-MIR395k	GAAACGCAAAGAACGTTAGCTGTCCCCCGGAGTTTCCCTGACCACTTCACTGGGGCTATAATTCTACTCTTCGTGTTTAAGGGTAGAGGCAACCCTTCCTCACTGAAGTGTTTGGGGGAACTCTGGGTGGCATTTAACACTGTTTAGCTGTC	152	-64.7
Known	miR396	ptc-miR396a-5p	TTCCACAGCTTTCTTGAACT	20	ptc-MIR396a	CTTGGTATTCTTCCACAGCTTTCTTGAACTGCACCTATTTGAATATTGTTGTTGATGTTGCCGTGCATGTACATATGACATTGTATTTTTGTTGCGGTTCAATAAAGCTGTGGGAAGATACAA	123	-45.2
Known	miR396	ptc-miR396b-5p	TTCCACAGCTTTCTTGAACT	20	ptc-MIR396b	CTTTGTATTCTTCCACAGCTTTCTTGAACTGCACCTATTAGATTAATGTTGATGTTGTTGTGCGATATGCCATGACCATATGACATTGTATTCATTTTTGCTGCGGTTCAATAAAGCTGTGGGAAGATACAA	132	-49.3
Known	miR396	ptc-miR396c-5p	TTCCACAGCTTTCTTGAACTT	21	ptc-MIR396c	TGCCATGTTTTTCCACAGCTTTCTTGAACTTCCTAGAGCCTAGAGGTGCTGCTAGCTATACATATAACTTAAGAAGTTCAAGAAAGCCGTGGAATAGCATGA	102	-44.3
Known	miR396	ptc-miR396e-5p	TTCCACAGCTTTCTTGAACT	20	ptc-MIR396e	GGTCATGCTTTTCCACAGCTTTCTTGAACTTCTTTGCCTTGCTTAATCTGTGTATATATAGATCACTACATGTACAGCTCCTATATATATAAATATATGTATGTATAGCGCCATGGAAGCTCAAGAAAGCTGTGGGAGAACATGG	145	-57
Known	miR396	ptc-miR396f-5p	TTTCCACGGCTTTCTTGAACT	21	ptc-MIR396f	CTTGGTGATTTTCCACGGCTTTCTTGAACTGTATATATTATCAATGGCTTTTTACAAGACTGGAAGATGGTTTCCATGGAGAAGAATTGTCACAAAAACAGTTCAAGAAAGCCCTGAAAAATTATTT	127	-41.5
Known	miR396	ptc-miR396g-5p	TTTCCACGGCTTTCTTGAACT	21	ptc-MIR396g	TTGCATGCTTTTCCACGGCTTTCTTGAACTTGGCACTCAAGAGACATGAGAGTAAAGGGCTAGGCTTTCTTTTCTATTCCTTTCGTTCTTTGAAATTTTCCTGTTCAAAGAATCCATACATATCAGTCTCTTTAGTACAAAGCTCAAGAAAGCCGTGGGAAAATATGA	168	-64.1
Known	miR398	ptc-miR398a-5p	GGAGTGGCTCCAGAGAACACAGG	23	ptc-MIR398a	GTACACCCCAGAGGAGTGGCTCCAGAGAACACAGGGGGTTGGTTTTCTAGCTGTAAGCTACAAGATGGACAAAGCACTCTGTGTTCTCAGGTCACCCCTTTGGGGCACC	109	-55
Known	miR398	ptc-miR398b-3p	TGTGTTCTCAGGTCGCCCCTG	21	ptc-MIR398b	AGGGTTCCGACAGGAGCGGCCTTGGCTCACATGTGGCGGCATCCAATGTACTTCATGTGTTCTCAGGTCGCCCCTGCCGGGCTTC	85	-39.4
Known	miR398	ptc-miR398c-3p	TGTGTTCTCAGGTCGCCCCTG	21	ptc-MIR398c	AGGATTCCTACAGGAGCGACCTGAAATCACATGTGGGCTGCACCCTCCTGGGTTATCTTGAGCAACATGTGTTCTCAGGTCGCCCCTGCCGGGCTTT	97	-44.1
Known	miR399	ptc-miR399f-3p	TGCCAAAGGAGAATTGCCCTG	21	ptc-MIR399f	TAAAGAATAACAGGGCTTTATCCTCCTTTGGCAAACAGAACATGGAAATAAATGCCTGCATATTTCTGTTTTGCCAAAGGAGAATTGCCCTGCCATTCGAT	101	-40.2
Known	miR399	ptc-miR399g-3p	TGCCAAAGGAGAATTGCCCTG	21	ptc-MIR399g	TGATGAATAACTGTGCAATTCTCCTTTGGCAGACGTATATGGCGTTCGGACACCAACTTTGGACTGCCAAAGGAGAATTGCCCTGCCATTCAAC	94	-39.2
Known	miR399	ptc-miR399h-3p	TGCCAAAGGAGAGTTTCCCTG	21	ptc-MIR399h	AAACCAGTTGCAGGGCACCTCTCTTCCTTGGCAGACAGTACTAATGGTGCCTATAGCTTCAAGCTGAGAGGGTATGCGAGAATCTTGATCCCAATATAGGCTTGCCAAAGGAGAGTTTCCCTGTGACCGTTT	132	-43.3
Known	miR399	ptc-miR399i-3p	TGCCAAAGGAGAGTTGCCCTA	21	ptc-MIR399i	AAACCAGTTGTAGGGTACCTCTTACTTGGCAAGCAATGGTGATTGTTGCAAACATTGCAGAATTTGATCTCGGTGTCTTGCCAAAGGAGAGTTGCCCTATGACTGTTT	108	-46.4
Known	miR403	ptc-miR403a-3p	TTAGATTCACGCACAAACTCG	21	ptc-MIR403a	AGGCATATTTCAGGTTTGTGCATGAATCTAATATAGCTAAAAAAATCCCATCAAACACAAATTAAAATACTAGATAGCAATCAGCACTAGTTTAGTATAGTATTAGATTCACGCACAAACTCGTAATCTGTC	132	-36.3
Known	miR403	ptc-miR403b-3p	TTAGATTCACGCACAAACTCG	21	ptc-MIR403b	ACTCATATCTCTAGTTTGTTCGTGGATCTGACGCCATCACAACCGTTCATTTCACGACCATCCAATGGCGTTAGATTCACGCACAAACTCGCGATCTGTC	100	-38.3
Known	miR403	ptc-miR403c-3p	TTAGATTCACGCACAAACTCG	21	ptc-MIR403c	GGTTTGTGCGTGGATCTGAGGCCATCACAACCGTCCACTACACGACCACCCAATGGCTTTAGATTCACGCACAAACTCG	79	-41.6
Known	miR403	ptc-miR403d-3p	TTAGATTCACGCACAAACTCG	21	ptc-MIR403d	AGGCATATTTCAGGTTTGTGCATGAATCTAATATAGCTAAAAAAATCCCATCAAACACAAATTAAAATACTAGATAGCAATCAGCACTAGTTTAGTATAGTATTAGATTCACGCACAAACTCGTAATCTGTC	132	-36.3
Known	miR408	ptc-miR408-3p	ATGCACTGCCTCTTCCCTGGC	21	ptc-MIR408	AGAGACAGATGAAGACGGGGAACAGGCAGAGCATGGATGGAGCTACTAACAGAAGTACTTGTTTTGGCTCTACCCATGCACTGCCTCTTCCCTGGCTTGTGGCTC	105	-50.8
Known	miR530	ptc-miR530a-5p	TGCATTTGCACCTGCACCTT	20	ptc-MIR530a	GCCAACATGTTGCCTTTATCTGCATTTGCACCTGCACCTTACTTGTTTCTTTCTTTTGTTTTTGACTCCAAAACCAAAAGTAAGTTTGAAACATTAAAACAAGCTTGAGGTGCAGGTGCAGGTGCAGGTGAATGCCATGTTGGT	144	-74.6
Known	miR1446	ptc-miR1446a-5p	TTCTGAACTCTCTCCCTCAAC	21	ptc-MIR1446a	CCAACTTCTTCTGAACTCTCTCCCTCAACCGCTACTCTAGAGCTTGGCAATCCTTGTCGATTGTTTCTGTGTAGCGGTTGAGGTGAGGGGTTCAGAACATGTTGG	105	-58.2
Known	miR1446	ptc-miR1446b-5p	TTCTGAACTCTCTCCCTCAAC	21	ptc-MIR1446b	CCAATTTCTTCTGAACTCTCTCCCTCAACCGCCACTCTAGAGGTTGGCACCTTGTCAATTGTTTCTGTGTAGCGGTCGAGGTGAGGGGTTCAGAACATGTTGG	103	-48.2
Known	miR1446	ptc-miR1446c-5p	TTCTGAACTCTCTCCCTCAACT	22	ptc-MIR1446c	CCAACTTTTTCTGAACTCTCTCCCTCAACTGCTATTCTAGAGCTTCCTGAGCTAACCCTTGTGTTTCTGTGTAGCAGTCAAGGTGGGAGGCTCAGAAAATGTTGG	105	-41.1
Known	miR1446	ptc-miR1446d-5p	TTCTGAACTCTCTCCCTCAACT	22	ptc-MIR1446d	CCAACTTCTTCTGAACTCTCTCCCTCAACTGCTACTCTAGATCTTGCCAATCCCTGTCAAGTGTTTCTGTGTAGCAGTCGAGGTGAGAGGTTCAGGAAATGTTGG	105	-49.3
Known	miR1446	ptc-miR1446e-5p	TTCTGAACTCTCTCCCTCAACT	22	ptc-MIR1446e	CCAACTTTTTCTGAACTCTCTCCCTCAACTGCTATTCTAGAGCTTGTTAATCCTTGTCAAGTGTTTCCCTGTAGCAGTCGAGGCGAGGGGGTTTCGGAAAATGTTGG	107	-49.1
Known	miR476	ptc-miR476a-5p	TAGTAATCCTTCTTTGCAAAG	21	ptc-MIR476a	TTAAGCTAGTAATCCTTCTTTGCAAAGTCATTTATTATTTTTCCTTCAATTACTATAATCAATGACTTTGCAAAGATAGATTTACTAGCTAAATCT	96	-37.7
Known	miR476	ptc-miR476b-3p	TTGCAAAGATAGATTTACTAGC	22	ptc-MIR476b	GCTAGTAATTCTTCTTTGCAAAATCATTAATTATCCTAGCTCTAATTACTATAATTAATGGCTTTGCAAAGATAGATTTACTAGCTAAATCTT	93	-35.2
Known	miR478	ptc-miR478e-3p	TTGACGAGTCTTCTATTTTTAGGG	24	ptc-MIR478e	GAGTCTTCTATCTTTAAGAACGGACATCATATTTCTCGTGAATGGTCTAATTGACGAGTCTTCTATTTTTAGGGATAGACACTAG	85	-23.3
Known	miR1447	ptc-miR1447-3p	CAGAATTGCAGTGCCTTGATT	21	ptc-MIR1447	GAGGCCCTAATCAGGGCACTGCAATTCTAAATGTCTGTTGGCAAGTGGCGATGCCAGACGTTTGAAATTTACTTATCATTTATTAGTCAGAATTGCAGTGCCTTGATTTGGGCTTT	116	-53.9
Known	miR1448	ptc-miR1448-5p	TATGGGAGGATTGGACAGTAC	21	ptc-MIR1448	GTTACGGGTATGGGAGGATTGGACAGTACTGCTTGGTTTTAATTAACCAAAGTCTGTTCTTTCCAACGCCTCCCATACCGGTAAT	85	-41.5
Known	miR6425	ptc-miR6425a-5p	TTGTCTTCCATGGAATAGGC	20	ptc-MIR6425a	GGACCCATGCATGGCGAACAAGTTGAGCTGTAGGGTTATGATGAACATGCTAATTACAAGCTATTGTCTTCCATGGAATAGGCAGTGATGGCATTTGTTTTATTTTCCTGAGGTGGAGAAAAACAAATAGACCATAACACTGTTATTCCATGGAAGATAATGACTCGTGGTTGACACTTGATCTCTCCAGTCCAGTTCAGATTCAAGCTAGCTGCTGTCT	220	-81.8
Known	miR6425	ptc-miR6425b-5p	TTGTCTTCCATGGAATAGGC	20	ptc-MIR6425b	GGACTCATGCATGGCGAACAAGTTGAGCTGTAGGGTTATGATGAACATGCTAATTACAAGCTATTGTCTTCCATGGAATAGGCAGTGATGGCATTTGTTTTATTTTCCTGAGGTGGAGAAAAACAAGGAGACCATAACACTGTTATTCCATGGAAGATAATGACTCGTGGTTGACACTTGATCTCTCCAGTCCAGTTCAGATTCAAGCTAGCTGCTGTCT	220	-80.8
Known	miR6425	ptc-miR6425c-5p	TTGTCTTCCATGGAATAGGC	20	ptc-MIR6425c	GGACTCATGCATGGCGAACAAGTTGAGCTGTAGGGTTATGATGAACATGCTAATTACAAGCTATTGTCTTCCATGGAATAGGCAGTGATGGCATTTGTTTTATTTTCCTGAGGTGGAGAAAAACAAGGAGACCATAACACTGTTATTCCATGGAAGATAATGACTCGTGGTTGACACTTGATCTCTCCAGTCCAGTTCAGATTCAAGCTAGCTGCTGTCT	220	-80.8
Known	miR6425	ptc-miR6425d-5p	TTGTCTTCCATGGAATAGGC	20	ptc-MIR6425d	GGACTCATGCATGGCGAACAAGTTGAGCTGTAGGGTTATGATGAACATGCTAATTACAAGCTATTGTCTTCCATGGAATAGGCAGTGATGGCATTTGTTTTATTTTCCTGAGGTGGAGAAAAACAAGGAGACCATAACACTGTTATTCCATGGAAGATAATGACTCGTGGTTGACACTTGATCTCTCCAGTCCAGTTCAGATTCAAGCTAGCTGCTGTCT	220	-80.8
Known	miR6425	ptc-miR6425e-5p	TTGTCTTCCATGGAATAGGC	20	ptc-MIR6425e	CTGAGAATTGGACTCATGCATGGCGAACAAGTTGAGCTGTAGGGTTATGATGAACATGCTAATTACAAGCCATTGTCTTCCATGGAATAGGCAGTGATGGCATTTGTTTTATTTTCCTGAGTTGGAGAAAAACAAATAGACCATAACACTGTTATTCCTTGGAAGATAATGACTCGTGGTTGACACTTGATCTCTCCAGTCCAGTTCAGATTCAAGCTAGCTGCTGTCTGTAAATTCTTTG	241	-85.2
Known	miR6427	ptc-miR6427-5p	TCGTAATGCTTCATTCTCACAA	22	ptc-MIR6427	TGCACGCTCTCGTAATGCTTCATTCTCACAACGGCAAAGTGTTATTGCATCATCCTAATGATTATCATCAGCCGTCGTGGGAATGAACATTATGAGACTGTGTA	104	-45.5
Known	miR6438	ptc-miR6438a-3p	TTGTACACAGAATAGGTGAA	20	ptc-MIR6438a	GAGAGTTGTTTGATCTGTCCTGAAACACCAATCACGAATCTTGCAAGAATTGAGGTATTGTACACAGAATAGGTGAAATAGCTTTC	86	-23.7
Known	miR6438	ptc-miR6438b-5p	TCGACTGAAAATGAAAGCTATTT	23	ptc-MIR6438b	CTTGGTTACTGATATTATTTTGAACCGTCATGTCAATTATTGGTTATATATCGACTGAAAATGAAAGCTATTTCACTATTCTGTGCACACAATGCTTGAAACATTAATCATGGTTTTTGAAAGTATTGGAGCATTGTACACAGAATAGGTGAAATAACTTTCATTTTCATTCGATACGCAACTAAAATTGTAAATATAGTTCAGTCTCATCTTGGAAGCCAAG	223	-76.1
Known	miR6445	ptc-miR6445a-3p	ATTTTAGGAAGGGAATGAATA	21	ptc-MIR6445a	TCTCTTTGCCACGTTGTTCATTCCTCTTCCTAAAATGGCTTCTCCTTCAATTTTAAAAAAAATAAAAATTAAAGGAGAATCCAATATGAAATGAGAAGCTATTTTAGGAAGGGAATGAATACGGTGTCGGTGTTATAAGAGA	142	-52.6
Known	miR6445	ptc-miR6445b-3p	ATTTTAGGAAGGGAATGAATA	21	ptc-MIR6445b	GGCTGCTTCTTTTTCTCTCTGGGCACGTTGTTCATTCCTCTTCCTAAAATGGCTTCTTCTCCTTTAGTTGTTGCAATTATAGGAGAGGAGAATCCATTTTAGGAAGGGAATGAATACTGTGTCGGTTTTACGAGGGAGACAATC	144	-67.6
Known	miR6459	ptc-miR6459a-3p	TCGAATTTGGGCTTGAGATT	20	ptc-MIR6459a	TGCAGAGTAGAAGTCGAGCTCAAGCACAAATTCGATCTTGCTTAACAAGGTACCGGCAAAGTCAGATCGAATTTGGGCTTGAGATTGTCTTCTTCGTTGCA	101	-45
Known	miR6459	ptc-miR6459b-3p	TCGAATTTGTGCTTGAGCTC	20	ptc-MIR6459b	AAGAAGACAATCTCAAGCCCAAATTCGATCTGACTTTGCCGGTACCTTGTTAAGCAAGATCGAATTTGTGCTTGAGCTCGACTTCTA	87	-34.9
Known	miR6478	ptc-miR6478-5p	CCGACCTTAGCTCAGTTGGTGGA	23	ptc-MIR6478	ACCGACCTTAGCTCAGTTGGTGGAGCGGAGGGCTGTAGGTCGCTGGTTGGATTCCGGCAAGGTCGGATTTCAATTTTGTAATTTCTTTTCTCACCGACCTTAGTTCAGAAGTTGCATTGTTTTGTCTGTTGAGGTGGT	138	-45.3
Known	miR7817	ptc-miR7817a-5p	TTTGGTTATTGTCTCGAGAC	20	ptc-MIR7817a	CTAACATCCCTCGGGTGGCGTTTGGTTATTGTCTCGAGACAGAAAAGATGGAGACAAAAACTTTTTTGGTTGAAGAGGCAGAGACAAAATAAATCTGTCTTTGTGATAATTTTAGAGTGAATTCCTGTATTTTCAAAACAAGAAGTATAAGGAGACATGTCTTATCTACCCCCACTGTCTCCGTCTCTTATGTTTCGATACAGTAACCAAACGCTACCTTGAGTACAAGGATGA	234	-92.8
Known	miR7828	ptc-miR7828-5p	TAAAATGATGACATGGACACC	21	ptc-MIR7828	TTTTTTTAAAATGATGACATGGACACCAAAATCTTACAAGAATAATGGTTAATGTTGTGAGTGAGCATAAAATTTGGGATGTGAATATGTGTTTCTTGGGTTAATTGGTGTCATGGCATACCTAGAGTGATAAAGACCTAATTTTTTTGTAAGTTTTTGGTGTCCATGTCATCATTTAATGGATA	185	-61.9
Known	miR7840	ptc-miR7840-5p	AGGAGTAATTAGTGACATCT	20	ptc-MIR7840	TTATAGTGCTCAAGGAGTAATTAGTGACATCTTATTAATTACATCCTAAGCTCATCTTGAAGAAAGAGACAGACACACAAAGGAAAGAGAAAATGAAACTCATGGCCCATCAAAAGCGATTAGAATAACCCTACCTAAGATATCTCTCTTGTACTTGTATCTATTTTTTTTTAAAGTGGATCAAAGGACTAGCTAATAAGATGTCACTAGTTACTTCTTCAACACCATAAA	231	-60.5
Novel	ptc-miRN1	ptc-miRN1-5p	TACGGGCCGGTACCATCTGGAT	22	ptc-MIRN1	AATCCATTTGACATAGCGGTTACGGGCCGGTACCATCTGGATCCGTATAGCCAGATGGGCTGGTCCTAATTGAACCATCACTTTTTATCTTCATTC	96	-31.6
Novel	ptc-miRN2	ptc-miRN2-5p	CGTCTGCCTGGGTGTCACGC	20	ptc-MIRN2	AGGCCTTCTGGTCGAGGACACGTCTGCCTGGGTGTCACGCATCGTCGCCCCCTCTCCCCTCGGCTCACGAGGGCGGGGGCGGATACTGGTCTCCCACGCGCTCCCGCTCGCGGTTGGCCTAAAATCGAGTCCTCGGCGACGGTCGCCACGACGAGCGGTGGTTGAGAGACCCTCAGACACGGTCGTGCGCACACCTGTCGCCCCCGGGATCTCCTGGACCCTCAGGCATTGAATTTCTAGGATGCTCTCATTGCGACCCCAGGTCAGGCGGGAGTACCCACTGAGTTTAA	290	-124.7
Novel	ptc-miRN3	ptc-miRN3-5p	AAGGAGTTTAGGATATGTAGGTG	23	ptc-MIRN3	TTTGGTCTTCATATGTTTGGAAGGAGTTTAGGATATGTAGGTGATCAGTTTCAGTTAGATGGTAGTCCTACCATCCTTTTAACTAACCAGAAAAACCAGCAATAAGGAGTTCATCAATAGCTTTGTCTGAGGTTCCTATTTGGGTTTTGTAGGCATTGGCTGCCATAGTCATTTGCTGGAGG	182	-47.7
Novel	ptc-miRN4	ptc-miRN4-5p	ATTTGGATTTAGATCGGTATGTG	23	ptc-MIRN4	TGGGGCGGAAATGCACCCGTATTTGGATTTAGATCGGTATGTGGATCAGAAAGTGGAAGTGCAAGAGCAGAACAGTTCAGGTACTACTGATGGGGTGGTGCCTGTGCAAAGTAACAAATTAGGGTTTCAAGCTCCTGCTTTGGTTAATGACAATTGCTGCTTTGAGTTGGATTTCTCTGCTGGATCTAAAACTTTTGCTGGTGGCTACGGCTATAATT	218	-62.7
Novel	ptc-miRN5	ptc-miRN5-5p	GATGGTTTGTTAGAGTTCTAGGC	23	ptc-MIRN5	CGTCAGACTCTTCTGGTGGGGATGGTTTGTTAGAGTTCTAGGCATGAGCACGCGCCAACGAATGCAAACTGTCTATAATTCAGCATCAAAGGA	93	-22.1
Novel	ptc-miRN6	ptc-miRN6-5p	TACATACACTGTGGGCAAAGATG	23	ptc-MIRN6	TCATACATGGACAGCTTCGATACATACACTGTGGGCAAAGATGGATCCATAATCTTAATTTGGTGATACATCTTCTCTTCACTGCTAGCTGATGTGTAGTGTGTGTGTGTGTGTTTGTGTTTGCTTTTGGAATATAATGGAGCACCTTGTAGTTTTGCCAGGGATTACGTGGTGGTGAGTTAGGCTTGGCAGCCATTGCTAAAATCTTGAACATGGAAAGAGTTGGTGGGGCACATCAAGCAGGGTCTGATTCTTTGTTGACGGCTCGTGTGTACACAAAGATGAGGATGGTA	293	-77.7
Novel	ptc-miRN7	ptc-miRN7-5p	TTGGGTTCTGTGATGGATGTT	21	ptc-MIRN7	CACCTAACAAATCTAAAAGATTGGGTTCTGTGATGGATGTTCACTGTTCATATCATCTAAAAGATTGACAGTGAAGCTCCATCACAAAACCCAGATCTTTTAGATGTTTTTAGGTAA	117	-57.4
Novel	ptc-miRN8	ptc-miRN8-5p	GTGGGCGTGCCGGAGTGGTTAT	22	ptc-MIRN8	GTCAACTGTAGTGGGCGTGCCGGAGTGGTTATCGGGCATGACTAGAAATCATGTGGGCTCTGCCCGCGCAGGTTCG	76	-28.8
Novel	ptc-miRN9	ptc-miRN9-5p	AGTTAAAGAGCTCTGAAGGAA	21	ptc-MIRN9	GTCTCAACTTTTTGTAGTTAAAGAGCTCTGAAGGAATGAACTGGGGATGCCAAGATAAATGTCGGCATTAGTCTTGTTACTTGAACAATCCTGTGTGTGAGACTGTGAATTTTAGAATGAAATTTGAGAGTTTGCCTGCGAAATTTAGATTGAAATTTAATCGTGTGTGACTGTGTGTGTGATTCTGTGACTCTGTTTTTTCTTACCCTGGATTTGGATTCATTGTAATTTATTTTAGACTGCTGCTGCTGCTGCTGAGTTGTGA	265	-54.8
Novel	ptc-miRN10	ptc-miRN10-5p	TATGGTCTTTGCAATGTAGTT	21	ptc-MIRN10	TCTGCAAGCATATGGTCTTTGCAATGTAGTTATCCAAGCATATGCAGATCATGGCATGACAGAAGAGTTAAATGTTGAGTCAACTAGGTCGCTTATGTAACCTGACGGAGCCATTGAAGACAATCATTTGTTGGTGTCTCATTGGATTTGTTACCTGACAGTGTTTATCCAACAAATGATTCTCTTCAATGGCTCGGTCAGGTTACACAAGTGACCTAGTTGGCTCAGCATTTATCGCTTCTGCCATGCCATGACCTGTATATACTTGTGAATAACTGCATTTTAAAGACCATATGCGTGGAGAA	305	-194
Novel	ptc-miRN11	ptc-miRN11-5p	AGTGAGTATTTGTAGTGCTGGA	22	ptc-MIRN11	TCCAGGATAGAGTGAGTATTTGTAGTGCTGGAAACAGTACACCTGCGCTGTCTCTGCTGCTATAGAACTCATTGCCTATACATTT	85	-24.8
Novel	ptc-miRN12	ptc-miRN12-5p	CCGAGCCAGGAACGACTTGCC	21	ptc-MIRN12	AAAAGACAAAAGAGTAGAGACCGAGCCAGGAACGACTTGCCGGCAGGCTACCAATTGCTACGTACAGAGCAATATGTATTCCGCCAGCTGGTCGTTCTTGGCTCAACTTTGCTCTTCGTTTTCTCAT	127	-59
Novel	ptc-miRN13	ptc-miRN13-5p	TCGCGATTGACTAGAGAGGC	20	ptc-MIRN13	TGGAACAGGATCGCGATTGACTAGAGAGGCACGAACGGGTTCATATTATGGTCGCAATTTCATCAGAAATTGGTCTCGTTGGCTGATTTTATGGACTTGTTGCAC	105	-24.3
Novel	ptc-miRN14	ptc-miRN14-3p	TTCTACGAGTTGCTCTGCAGGGG	23	ptc-MIRN14	CATCCACGGAGCTTCTACGAGTTGCTCTGCAGGGGTTTCTGGCGACAGCAAACGAACCTGTTCCGGATAATTTGCAATCAATGACTGACTTGCAATTAATTGATGCTCTAAGAAATTATCTATGGAGAAGGAGGTATGTCATTGTTTTGGATGATATATGGAATGTAAACGCTTGGGAAAAAATAAAGTATGCATTTCCTGATTGTAACTGTGGTAGTAGAATTATCT	228	-56.6
Novel	ptc-miRN15	ptc-miRN15-3p	TTCTACGAGTTGCTCTGCAGGGG	23	ptc-MIRN15	CATCCACGGAGCTTCTACGAGTTGCTCTGCAGGGGTTTCTGGCGACAGCAAACGAACCTGTTCCGGATAATTTGCAATCAATGACTGACTTGCAATTAATTGATGCTCTAAGAAATTATCTATGGAGAAGGAGGTATGTCATTGTTTTGGATGATATATGGAATGTAAACGCTTGGGAAACAATAAAGTATCCATTTCCTGATTGTAACTGTGGTAGTAGAATTATCT	228	-54.8
Novel	ptc-miRN16	ptc-miRN16-3p	GTAATCTGTTGAAATTCTGGGTT	23	ptc-MIRN16	AAGGGATAACAGTAGGTAATCTGTTGAAATTCTGGGTTTGAGGTTGAAGATGATGAAAATTCAGTTTGGTCCCTCAATTTGTGAAAGTTGCAGTTTAGTCCCCGAACTTTGGAAATATTACAGATTGGTCCCT	133	-29.8
Novel	ptc-miRN17	ptc-miRN17-3p	GACGGCTCGGCTTGTGGCTCA	21	ptc-MIRN17	CGGCTCGACACGGCGCGGATGACGGCTCGGCTTGTGGCTCAGCTGGACTCGGCTATCGGCTCGGCTAGGACTCGGCGTAAACGGCTCGGCTCGGCTCGATATGGCGCGCGTGGACATCACTCGTCTTCAACCTCTGGCGCGCGTGGCTGCGCGTGGGCGACTGTCACCGGATCTTCAGGAGGCGCGTGTGGCTCACCGCGGTCTCCGATCAGGCTGATTCTTGCAACAATGAGTTCGTATTGATG	245	-88.9
Novel	ptc-miRN18	ptc-miRN18-5p	AAGTAACTTCATTGATTGAT	20	ptc-MIRN18	GCTTGTAAAAAAGTAACTTCATTGATTGATTCAGAATATTTTTTCCTCGATAGTATCTTATCTATCAATACTGTTACAAGAAAGAAGGAATTGCTAAATTTTCTTTTCTTAGATCACACACACACACACACATATATATTTCTTTTTTTTTGGTTTTATGTCGATCCGATATGAAGTTCTATTTGCTCAA	190	-31.34
Novel	ptc-miRN19	ptc-miRN19-5p	TCAGATGGAAGGAATGAGTGT	21	ptc-MIRN19	GAAACATGGTTCAGATGGAAGGAATGAGTGTCAATGGGAGGGTCAAGCAATGCCGTTTGCACGATCTACTGCGAGACCTCTCCATCTCCAAGGCAAAGACGGAGAATTTTCTCCAGATTCCTGGTAATGAAAATATCCCATCTTTGACTAGATGTCGTCGCCATCCTATCTATTCTGATTCTCATTTA	188	-52.2
Novel	ptc-miRN20	ptc-miRN20-5p	CAAAACCAACTCTAATAGACT	21	ptc-MIRN20	AGAATTTGGGGTTGTGTCCTCAAAACCAACTCTAATAGACTTGCTTTCGTTGCCAAGGACTCAACAAAAGCAAGTCTTCTTTGGTTCTTGTCCTCTATCAAAGTTTAGCATCACCTGTGAGATATATAACGGTGAGATTAACTTGTTCAGCCAAGTCAATCTTCGCAACACTAAAGTATTGCTCCATGTCAAGTTCCTTGGAACTTCTTGCCCCACTGAAAGCAAGTCCATTTGAGTTGGTTTTGGGGACACAAACCTAAACTGCTGTTGAGA	273	-97.8
Novel	ptc-miRN21	ptc-miRN21-3p	AGTGAGTATTTGTAGTGCTGGA	22	ptc-MIRN21	TCCTGGATAGAGTGAGTATTTGTAGTGCTGGAAACAGTACACCTGCGCTGTCTCTGCTGCTATAGAACTCATTGCCTATACATTT	85	-25.6
