# Supplementary material for: Genome-Wide Analysis of Coding and Non-coding RNA Reveals a Conserved miR164–NAC–mRNA Regulatory Pathway for Disease Defense in Populus
Source: Front Genet. 2021 May 28;12:668940. doi: 10.3389/fgene.2021.668940 (PMC8195341; doi:10.3389/fgene.2021.668940)
Supplement: Supplementary Data 13 — WGD pairs in all target genes. [file Data_Sheet_13.xlsx]

## Sheet: Sheet1
Supplementary Data 13 | WGD pairs in all target genes.
Conserved/Specific	miRNA	WGD pairs	WGD pairs	Gene_symbol	NR_annotation
Conserved	ptc-miR160a	Potri.004G211700	Potri.009G011800	ARF10	auxin response factor 10
Conserved	ptc-miR160a	Potri.008G039000	Potri.010G223200	ARF16	auxin response factor 16
Conserved	ptc-miR160a	Potri.010G223200	Potri.008G039000	ARF16	auxin response factor 16
Conserved	ptc-miR160d	Potri.004G211700	Potri.009G011800	ARF10	auxin response factor 10
Conserved	ptc-miR160d	Potri.008G039000	Potri.010G223200	ARF16	auxin response factor 16
Conserved	ptc-miR160d	Potri.010G223200	Potri.008G039000	ARF16	auxin response factor 16
Conserved	ptc-miR398b	Potri.009G067800	Potri.001G273600	0	las1-like family protein
Conserved	ptc-miR398c	Potri.009G067800	Potri.001G273600	0	las1-like family protein
Conserved	ptc-miR160a	Potri.002G089900	Potri.005G171300	ARF17	auxin response factor 17
Conserved	ptc-miR160a	Potri.005G171300	Potri.002G089900	ARF17	auxin response factor 17
Conserved	ptc-miR160a	Potri.016G090300	Potri.006G127500	ARF16	auxin response factor 16
Conserved	ptc-miR160d	Potri.002G089900	Potri.005G171300	ARF17	auxin response factor 17
Conserved	ptc-miR160d	Potri.005G171300	Potri.002G089900	ARF17	auxin response factor 17
Conserved	ptc-miR160d	Potri.016G090300	Potri.006G127500	ARF16	auxin response factor 16
Conserved	ptc-miR164a	Potri.015G020000	Potri.012G001400	ANAC100,ATNAC5,NAC100	NAC domain containing protein 100
Conserved	ptc-miR164a	Potri.012G001400	Potri.015G020000	ANAC100,ATNAC5,NAC100	NAC domain containing protein 100
Conserved	ptc-miR164b	Potri.015G020000	Potri.012G001400	ANAC100,ATNAC5,NAC100	NAC domain containing protein 100
Conserved	ptc-miR164b	Potri.012G001400	Potri.015G020000	ANAC100,ATNAC5,NAC100	NAC domain containing protein 100
Conserved	ptc-miR164c	Potri.015G020000	Potri.012G001400	ANAC100,ATNAC5,NAC100	NAC domain containing protein 100
Conserved	ptc-miR164c	Potri.012G001400	Potri.015G020000	ANAC100,ATNAC5,NAC100	NAC domain containing protein 100
Conserved	ptc-miR164d	Potri.015G020000	Potri.012G001400	ANAC100,ATNAC5,NAC100	NAC domain containing protein 100
Conserved	ptc-miR164d	Potri.012G001400	Potri.015G020000	ANAC100,ATNAC5,NAC100	NAC domain containing protein 100
Conserved	ptc-miR166a	Potri.003G050100	Potri.001G188800	ATHB-15,ATHB15,CNA,ICU4	Homeobox-leucine zipper family protein / lipid-binding START domain-containing protein
Conserved	ptc-miR166a	Potri.001G188800	Potri.003G050100	ATHB-15,ATHB15,CNA,ICU4	Homeobox-leucine zipper family protein / lipid-binding START domain-containing protein
Conserved	ptc-miR166b	Potri.003G050100	Potri.001G188800	ATHB-15,ATHB15,CNA,ICU4	Homeobox-leucine zipper family protein / lipid-binding START domain-containing protein
Conserved	ptc-miR166b	Potri.001G188800	Potri.003G050100	ATHB-15,ATHB15,CNA,ICU4	Homeobox-leucine zipper family protein / lipid-binding START domain-containing protein
Conserved	ptc-miR166c	Potri.003G050100	Potri.001G188800	ATHB-15,ATHB15,CNA,ICU4	Homeobox-leucine zipper family protein / lipid-binding START domain-containing protein
Conserved	ptc-miR166c	Potri.001G188800	Potri.003G050100	ATHB-15,ATHB15,CNA,ICU4	Homeobox-leucine zipper family protein / lipid-binding START domain-containing protein
Conserved	ptc-miR166d	Potri.003G050100	Potri.001G188800	ATHB-15,ATHB15,CNA,ICU4	Homeobox-leucine zipper family protein / lipid-binding START domain-containing protein
Conserved	ptc-miR166d	Potri.001G188800	Potri.003G050100	ATHB-15,ATHB15,CNA,ICU4	Homeobox-leucine zipper family protein / lipid-binding START domain-containing protein
Conserved	ptc-miR166e	Potri.003G050100	Potri.001G188800	ATHB-15,ATHB15,CNA,ICU4	Homeobox-leucine zipper family protein / lipid-binding START domain-containing protein
Conserved	ptc-miR166e	Potri.001G188800	Potri.003G050100	ATHB-15,ATHB15,CNA,ICU4	Homeobox-leucine zipper family protein / lipid-binding START domain-containing protein
Conserved	ptc-miR166f	Potri.003G050100	Potri.001G188800	ATHB-15,ATHB15,CNA,ICU4	Homeobox-leucine zipper family protein / lipid-binding START domain-containing protein
Conserved	ptc-miR166f	Potri.001G188800	Potri.003G050100	ATHB-15,ATHB15,CNA,ICU4	Homeobox-leucine zipper family protein / lipid-binding START domain-containing protein
Conserved	ptc-miR166g	Potri.003G050100	Potri.001G188800	ATHB-15,ATHB15,CNA,ICU4	Homeobox-leucine zipper family protein / lipid-binding START domain-containing protein
Conserved	ptc-miR166g	Potri.001G188800	Potri.003G050100	ATHB-15,ATHB15,CNA,ICU4	Homeobox-leucine zipper family protein / lipid-binding START domain-containing protein
Conserved	ptc-miR166h	Potri.003G050100	Potri.001G188800	ATHB-15,ATHB15,CNA,ICU4	Homeobox-leucine zipper family protein / lipid-binding START domain-containing protein
Conserved	ptc-miR166h	Potri.001G188800	Potri.003G050100	ATHB-15,ATHB15,CNA,ICU4	Homeobox-leucine zipper family protein / lipid-binding START domain-containing protein
Conserved	ptc-miR166i	Potri.003G050100	Potri.001G188800	ATHB-15,ATHB15,CNA,ICU4	Homeobox-leucine zipper family protein / lipid-binding START domain-containing protein
Conserved	ptc-miR166i	Potri.001G188800	Potri.003G050100	ATHB-15,ATHB15,CNA,ICU4	Homeobox-leucine zipper family protein / lipid-binding START domain-containing protein
Conserved	ptc-miR166j	Potri.003G050100	Potri.001G188800	ATHB-15,ATHB15,CNA,ICU4	Homeobox-leucine zipper family protein / lipid-binding START domain-containing protein
Conserved	ptc-miR166j	Potri.001G188800	Potri.003G050100	ATHB-15,ATHB15,CNA,ICU4	Homeobox-leucine zipper family protein / lipid-binding START domain-containing protein
Conserved	ptc-miR166k	Potri.003G050100	Potri.001G188800	ATHB-15,ATHB15,CNA,ICU4	Homeobox-leucine zipper family protein / lipid-binding START domain-containing protein
Conserved	ptc-miR166k	Potri.001G188800	Potri.003G050100	ATHB-15,ATHB15,CNA,ICU4	Homeobox-leucine zipper family protein / lipid-binding START domain-containing protein
Conserved	ptc-miR166l	Potri.003G050100	Potri.001G188800	ATHB-15,ATHB15,CNA,ICU4	Homeobox-leucine zipper family protein / lipid-binding START domain-containing protein
Conserved	ptc-miR166l	Potri.001G188800	Potri.003G050100	ATHB-15,ATHB15,CNA,ICU4	Homeobox-leucine zipper family protein / lipid-binding START domain-containing protein
Conserved	ptc-miR166m	Potri.003G050100	Potri.001G188800	ATHB-15,ATHB15,CNA,ICU4	Homeobox-leucine zipper family protein / lipid-binding START domain-containing protein
Conserved	ptc-miR166m	Potri.001G188800	Potri.003G050100	ATHB-15,ATHB15,CNA,ICU4	Homeobox-leucine zipper family protein / lipid-binding START domain-containing protein
Conserved	ptc-miR166q	Potri.003G050100	Potri.001G188800	ATHB-15,ATHB15,CNA,ICU4	Homeobox-leucine zipper family protein / lipid-binding START domain-containing protein
Conserved	ptc-miR166q	Potri.001G188800	Potri.003G050100	ATHB-15,ATHB15,CNA,ICU4	Homeobox-leucine zipper family protein / lipid-binding START domain-containing protein
Conserved	ptc-miR172a	Potri.005G140700	Potri.007G046200	AP2,FL1,FLO2	Integrase-type DNA-binding superfamily protein
Conserved	ptc-miR172a	Potri.010G216200	Potri.008G045300	RAP2.7,TOE1	related to AP2.7
Conserved	ptc-miR172a	Potri.008G045300	Potri.010G216200	RAP2.7,TOE1	related to AP2.7
Conserved	ptc-miR172c	Potri.005G140700	Potri.007G046200	AP2,FL1,FLO2	Integrase-type DNA-binding superfamily protein
Conserved	ptc-miR172c	Potri.010G216200	Potri.008G045300	RAP2.7,TOE1	related to AP2.7
Conserved	ptc-miR172c	Potri.008G045300	Potri.010G216200	RAP2.7,TOE1	related to AP2.7
Conserved	ptc-miR172f	Potri.005G140700	Potri.007G046200	AP2,FL1,FLO2	Integrase-type DNA-binding superfamily protein
Conserved	ptc-miR172f	Potri.010G216200	Potri.008G045300	RAP2.7,TOE1	related to AP2.7
Conserved	ptc-miR172f	Potri.008G045300	Potri.010G216200	RAP2.7,TOE1	related to AP2.7
Conserved	ptc-miR395a	Potri.008G159000	Potri.010G081200	APS1	ATP sulfurylase 1
Conserved	ptc-miR156a	Potri.002G142400	Potri.014G057800	SPL11	squamosa promoter-like 11
Conserved	ptc-miR156a	Potri.015G098900	Potri.012G100700	0	Squamosa promoter-binding protein-like (SBP domain) transcription factor family protein
Conserved	ptc-miR156a	Potri.014G057800	Potri.002G142400	SPL10	squamosa promoter binding protein-like 10
Conserved	ptc-miR156a	Potri.001G058600	Potri.003G169400	0	Squamosa promoter-binding protein-like (SBP domain) transcription factor family protein
Conserved	ptc-miR156a	Potri.003G169400	Potri.001G058600	0	Squamosa promoter-binding protein-like (SBP domain) transcription factor family protein
Conserved	ptc-miR156a	Potri.001G055900	Potri.003G172600	SPL2	squamosa promoter binding protein-like 2
Conserved	ptc-miR156a	Potri.004G046700	Potri.011G055900	SPL3	squamosa promoter binding protein-like 3
Conserved	ptc-miR156a	Potri.001G398200	Potri.011G116800	SPL5	squamosa promoter binding protein-like 5
Conserved	ptc-miR156a	Potri.011G116800	Potri.001G398200	SPL5	squamosa promoter binding protein-like 5
Conserved	ptc-miR156a	Potri.007G138800	Potri.017G012900	SPL4	squamosa promoter binding protein-like 4
Conserved	ptc-miR156b	Potri.002G142400	Potri.014G057800	SPL11	squamosa promoter-like 11
Conserved	ptc-miR156b	Potri.015G098900	Potri.012G100700	0	Squamosa promoter-binding protein-like (SBP domain) transcription factor family protein
Conserved	ptc-miR156b	Potri.014G057800	Potri.002G142400	SPL10	squamosa promoter binding protein-like 10
Conserved	ptc-miR156b	Potri.001G058600	Potri.003G169400	0	Squamosa promoter-binding protein-like (SBP domain) transcription factor family protein
Conserved	ptc-miR156b	Potri.003G169400	Potri.001G058600	0	Squamosa promoter-binding protein-like (SBP domain) transcription factor family protein
Conserved	ptc-miR156b	Potri.001G055900	Potri.003G172600	SPL2	squamosa promoter binding protein-like 2
Conserved	ptc-miR156b	Potri.004G046700	Potri.011G055900	SPL3	squamosa promoter binding protein-like 3
Conserved	ptc-miR156b	Potri.001G398200	Potri.011G116800	SPL5	squamosa promoter binding protein-like 5
Conserved	ptc-miR156b	Potri.011G116800	Potri.001G398200	SPL5	squamosa promoter binding protein-like 5
Conserved	ptc-miR156b	Potri.007G138800	Potri.017G012900	SPL4	squamosa promoter binding protein-like 4
Conserved	ptc-miR156c	Potri.002G142400	Potri.014G057800	SPL11	squamosa promoter-like 11
Conserved	ptc-miR156c	Potri.015G098900	Potri.012G100700	0	Squamosa promoter-binding protein-like (SBP domain) transcription factor family protein
Conserved	ptc-miR156c	Potri.014G057800	Potri.002G142400	SPL10	squamosa promoter binding protein-like 10
Conserved	ptc-miR156c	Potri.001G058600	Potri.003G169400	0	Squamosa promoter-binding protein-like (SBP domain) transcription factor family protein
Conserved	ptc-miR156c	Potri.003G169400	Potri.001G058600	0	Squamosa promoter-binding protein-like (SBP domain) transcription factor family protein
Conserved	ptc-miR156c	Potri.001G055900	Potri.003G172600	SPL2	squamosa promoter binding protein-like 2
Conserved	ptc-miR156c	Potri.004G046700	Potri.011G055900	SPL3	squamosa promoter binding protein-like 3
Conserved	ptc-miR156c	Potri.001G398200	Potri.011G116800	SPL5	squamosa promoter binding protein-like 5
Conserved	ptc-miR156c	Potri.011G116800	Potri.001G398200	SPL5	squamosa promoter binding protein-like 5
Conserved	ptc-miR156c	Potri.007G138800	Potri.017G012900	SPL4	squamosa promoter binding protein-like 4
Conserved	ptc-miR156d	Potri.002G142400	Potri.014G057800	SPL11	squamosa promoter-like 11
Conserved	ptc-miR156d	Potri.015G098900	Potri.012G100700	0	Squamosa promoter-binding protein-like (SBP domain) transcription factor family protein
Conserved	ptc-miR156d	Potri.014G057800	Potri.002G142400	SPL10	squamosa promoter binding protein-like 10
Conserved	ptc-miR156d	Potri.001G058600	Potri.003G169400	0	Squamosa promoter-binding protein-like (SBP domain) transcription factor family protein
Conserved	ptc-miR156d	Potri.003G169400	Potri.001G058600	0	Squamosa promoter-binding protein-like (SBP domain) transcription factor family protein
Conserved	ptc-miR156d	Potri.001G055900	Potri.003G172600	SPL2	squamosa promoter binding protein-like 2
Conserved	ptc-miR156d	Potri.004G046700	Potri.011G055900	SPL3	squamosa promoter binding protein-like 3
Conserved	ptc-miR156d	Potri.001G398200	Potri.011G116800	SPL5	squamosa promoter binding protein-like 5
Conserved	ptc-miR156d	Potri.011G116800	Potri.001G398200	SPL5	squamosa promoter binding protein-like 5
Conserved	ptc-miR156d	Potri.007G138800	Potri.017G012900	SPL4	squamosa promoter binding protein-like 4
Conserved	ptc-miR156e	Potri.002G142400	Potri.014G057800	SPL11	squamosa promoter-like 11
Conserved	ptc-miR156e	Potri.015G098900	Potri.012G100700	0	Squamosa promoter-binding protein-like (SBP domain) transcription factor family protein
Conserved	ptc-miR156e	Potri.014G057800	Potri.002G142400	SPL10	squamosa promoter binding protein-like 10
Conserved	ptc-miR156e	Potri.001G058600	Potri.003G169400	0	Squamosa promoter-binding protein-like (SBP domain) transcription factor family protein
Conserved	ptc-miR156e	Potri.003G169400	Potri.001G058600	0	Squamosa promoter-binding protein-like (SBP domain) transcription factor family protein
Conserved	ptc-miR156e	Potri.001G055900	Potri.003G172600	SPL2	squamosa promoter binding protein-like 2
Conserved	ptc-miR156e	Potri.004G046700	Potri.011G055900	SPL3	squamosa promoter binding protein-like 3
Conserved	ptc-miR156e	Potri.001G398200	Potri.011G116800	SPL5	squamosa promoter binding protein-like 5
Conserved	ptc-miR156e	Potri.011G116800	Potri.001G398200	SPL5	squamosa promoter binding protein-like 5
Conserved	ptc-miR156e	Potri.007G138800	Potri.017G012900	SPL4	squamosa promoter binding protein-like 4
Conserved	ptc-miR156f	Potri.002G142400	Potri.014G057800	SPL11	squamosa promoter-like 11
Conserved	ptc-miR156f	Potri.015G098900	Potri.012G100700	0	Squamosa promoter-binding protein-like (SBP domain) transcription factor family protein
Conserved	ptc-miR156f	Potri.014G057800	Potri.002G142400	SPL10	squamosa promoter binding protein-like 10
Conserved	ptc-miR156f	Potri.001G058600	Potri.003G169400	0	Squamosa promoter-binding protein-like (SBP domain) transcription factor family protein
Conserved	ptc-miR156f	Potri.003G169400	Potri.001G058600	0	Squamosa promoter-binding protein-like (SBP domain) transcription factor family protein
Conserved	ptc-miR156f	Potri.001G055900	Potri.003G172600	SPL2	squamosa promoter binding protein-like 2
Conserved	ptc-miR156f	Potri.004G046700	Potri.011G055900	SPL3	squamosa promoter binding protein-like 3
Conserved	ptc-miR156f	Potri.001G398200	Potri.011G116800	SPL5	squamosa promoter binding protein-like 5
Conserved	ptc-miR156f	Potri.011G116800	Potri.001G398200	SPL5	squamosa promoter binding protein-like 5
Conserved	ptc-miR156f	Potri.007G138800	Potri.017G012900	SPL4	squamosa promoter binding protein-like 4
Conserved	ptc-miR159c	Potri.001G036000	Potri.003G189700	ATMYB65,MYB65	myb domain protein 65
Conserved	ptc-miR159c	Potri.009G018700	Potri.001G224500	ATMYB33,MYB33	myb domain protein 33
Conserved	ptc-miR160e	Potri.002G089900	Potri.005G171300	ARF17	auxin response factor 17
Conserved	ptc-miR160e	Potri.005G171300	Potri.002G089900	ARF17	auxin response factor 17
Conserved	ptc-miR160e	Potri.004G211700	Potri.009G011800	ARF10	auxin response factor 10
Conserved	ptc-miR160e	Potri.008G039000	Potri.010G223200	ARF16	auxin response factor 16
Conserved	ptc-miR160e	Potri.010G223200	Potri.008G039000	ARF16	auxin response factor 16
Conserved	ptc-miR160e	Potri.016G090300	Potri.006G127500	ARF16	auxin response factor 16
Conserved	ptc-miR160f	Potri.002G089900	Potri.005G171300	ARF17	auxin response factor 17
Conserved	ptc-miR160f	Potri.005G171300	Potri.002G089900	ARF17	auxin response factor 17
Conserved	ptc-miR160f	Potri.004G211700	Potri.009G011800	ARF10	auxin response factor 10
Conserved	ptc-miR160f	Potri.008G039000	Potri.010G223200	ARF16	auxin response factor 16
Conserved	ptc-miR160f	Potri.010G223200	Potri.008G039000	ARF16	auxin response factor 16
Conserved	ptc-miR160f	Potri.016G090300	Potri.006G127500	ARF16	auxin response factor 16
Conserved	ptc-miR164a	Potri.001G396400	Potri.011G123300;Potri.011G115400	ANAC098,ATCUC2,CUC2	NAC (No Apical Meristem) domain transcriptional regulator superfamily protein
Conserved	ptc-miR164a	Potri.011G115400	Potri.001G396400	ANAC098,ATCUC2,CUC2	NAC (No Apical Meristem) domain transcriptional regulator superfamily protein
Conserved	ptc-miR164b	Potri.001G396400	Potri.011G123300;Potri.011G115400	ANAC098,ATCUC2,CUC2	NAC (No Apical Meristem) domain transcriptional regulator superfamily protein
Conserved	ptc-miR164b	Potri.011G115400	Potri.001G396400	ANAC098,ATCUC2,CUC2	NAC (No Apical Meristem) domain transcriptional regulator superfamily protein
Conserved	ptc-miR164c	Potri.001G396400	Potri.011G123300;Potri.011G115400	ANAC098,ATCUC2,CUC2	NAC (No Apical Meristem) domain transcriptional regulator superfamily protein
Conserved	ptc-miR164c	Potri.011G115400	Potri.001G396400	ANAC098,ATCUC2,CUC2	NAC (No Apical Meristem) domain transcriptional regulator superfamily protein
Conserved	ptc-miR164d	Potri.001G396400	Potri.011G123300;Potri.011G115400	ANAC098,ATCUC2,CUC2	NAC (No Apical Meristem) domain transcriptional regulator superfamily protein
Conserved	ptc-miR164d	Potri.011G115400	Potri.001G396400	ANAC098,ATCUC2,CUC2	NAC (No Apical Meristem) domain transcriptional regulator superfamily protein
Conserved	ptc-miR393a	Potri.017G061600	Potri.001G323100	AFB2	auxin signaling F-box 2
Conserved	ptc-miR393a	Potri.001G323100	Potri.017G061600	AFB2	auxin signaling F-box 2
Conserved	ptc-miR393a	Potri.014G134800	Potri.002G207800	TIR1	F-box/RNI-like superfamily protein
Conserved	ptc-miR393a	Potri.002G207800	Potri.014G134800	TIR1	F-box/RNI-like superfamily protein
Conserved	ptc-miR393b	Potri.017G061600	Potri.001G323100	AFB2	auxin signaling F-box 2
Conserved	ptc-miR393b	Potri.001G323100	Potri.017G061600	AFB2	auxin signaling F-box 2
Conserved	ptc-miR393b	Potri.014G134800	Potri.002G207800	TIR1	F-box/RNI-like superfamily protein
Conserved	ptc-miR393b	Potri.002G207800	Potri.014G134800	TIR1	F-box/RNI-like superfamily protein
Conserved	ptc-miR393c	Potri.017G061600	Potri.001G323100	AFB2	auxin signaling F-box 2
Conserved	ptc-miR393c	Potri.001G323100	Potri.017G061600	AFB2	auxin signaling F-box 2
Conserved	ptc-miR393c	Potri.014G134800	Potri.002G207800	TIR1	F-box/RNI-like superfamily protein
Conserved	ptc-miR393c	Potri.002G207800	Potri.014G134800	TIR1	F-box/RNI-like superfamily protein
Conserved	ptc-miR399h	Potri.001G415800	Potri.011G131500	0	basic helix-loop-helix (bHLH) DNA-binding superfamily protein
Conserved	ptc-miR530a	Potri.008G135500	Potri.010G105600	ARR2,RR2	response regulator 2
Specific	ptc-miR7817a	Potri.006G026200	Potri.016G024400	ZIFL1	zinc induced facilitator-like 1
Conserved	ptc-miR156g	Potri.004G046700	Potri.011G055900	SPL3	squamosa promoter binding protein-like 3
Conserved	ptc-miR156g	Potri.001G055900	Potri.003G172600	SPL2	squamosa promoter binding protein-like 2
Conserved	ptc-miR156h	Potri.001G055900	Potri.003G172600	SPL2	squamosa promoter binding protein-like 2
Conserved	ptc-miR156h	Potri.004G046700	Potri.011G055900	SPL3	squamosa promoter binding protein-like 3
Conserved	ptc-miR156j	Potri.002G142400	Potri.014G057800	SPL11	squamosa promoter-like 11
Conserved	ptc-miR156j	Potri.015G098900	Potri.012G100700	0	Squamosa promoter-binding protein-like (SBP domain) transcription factor family protein
Conserved	ptc-miR156j	Potri.014G057800	Potri.002G142400	SPL10	squamosa promoter binding protein-like 10
Conserved	ptc-miR156j	Potri.001G058600	Potri.003G169400	0	Squamosa promoter-binding protein-like (SBP domain) transcription factor family protein
Conserved	ptc-miR156j	Potri.003G169400	Potri.001G058600	0	Squamosa promoter-binding protein-like (SBP domain) transcription factor family protein
Conserved	ptc-miR156j	Potri.001G055900	Potri.003G172600	SPL2	squamosa promoter binding protein-like 2
Conserved	ptc-miR156j	Potri.004G046700	Potri.011G055900	SPL3	squamosa promoter binding protein-like 3
Conserved	ptc-miR156j	Potri.007G138800	Potri.017G012900	SPL4	squamosa promoter binding protein-like 4
Conserved	ptc-miR156j	Potri.012G131300	Potri.015G133100	AAT1,CAT1	amino acid transporter 1
Conserved	ptc-miR159a	Potri.010G157700	Potri.008G096900	0	Asparagine synthase family protein
Conserved	ptc-miR159b	Potri.010G157700	Potri.008G096900	0	Asparagine synthase family protein
Conserved	ptc-miR160e	Potri.017G031700	Potri.007G127300	0	S-adenosyl-L-methionine-dependent methyltransferases superfamily protein
Conserved	ptc-miR160f	Potri.017G031700	Potri.007G127300	0	S-adenosyl-L-methionine-dependent methyltransferases superfamily protein
Conserved	ptc-miR166a	Potri.001G372300	Potri.011G098300	ATHB-14,ATHB14,PHB,PHB-1D	Homeobox-leucine zipper family protein / lipid-binding START domain-containing protein
Conserved	ptc-miR166b	Potri.001G372300	Potri.011G098300	ATHB-14,ATHB14,PHB,PHB-1D	Homeobox-leucine zipper family protein / lipid-binding START domain-containing protein
Conserved	ptc-miR166c	Potri.001G372300	Potri.011G098300	ATHB-14,ATHB14,PHB,PHB-1D	Homeobox-leucine zipper family protein / lipid-binding START domain-containing protein
Conserved	ptc-miR166d	Potri.001G372300	Potri.011G098300	ATHB-14,ATHB14,PHB,PHB-1D	Homeobox-leucine zipper family protein / lipid-binding START domain-containing protein
Conserved	ptc-miR166e	Potri.001G372300	Potri.011G098300	ATHB-14,ATHB14,PHB,PHB-1D	Homeobox-leucine zipper family protein / lipid-binding START domain-containing protein
Conserved	ptc-miR166f	Potri.001G372300	Potri.011G098300	ATHB-14,ATHB14,PHB,PHB-1D	Homeobox-leucine zipper family protein / lipid-binding START domain-containing protein
Conserved	ptc-miR166g	Potri.001G372300	Potri.011G098300	ATHB-14,ATHB14,PHB,PHB-1D	Homeobox-leucine zipper family protein / lipid-binding START domain-containing protein
Conserved	ptc-miR166h	Potri.001G372300	Potri.011G098300	ATHB-14,ATHB14,PHB,PHB-1D	Homeobox-leucine zipper family protein / lipid-binding START domain-containing protein
Conserved	ptc-miR166i	Potri.001G372300	Potri.011G098300	ATHB-14,ATHB14,PHB,PHB-1D	Homeobox-leucine zipper family protein / lipid-binding START domain-containing protein
Conserved	ptc-miR166j	Potri.001G372300	Potri.011G098300	ATHB-14,ATHB14,PHB,PHB-1D	Homeobox-leucine zipper family protein / lipid-binding START domain-containing protein
Conserved	ptc-miR166k	Potri.001G372300	Potri.011G098300	ATHB-14,ATHB14,PHB,PHB-1D	Homeobox-leucine zipper family protein / lipid-binding START domain-containing protein
Conserved	ptc-miR166l	Potri.001G372300	Potri.011G098300	ATHB-14,ATHB14,PHB,PHB-1D	Homeobox-leucine zipper family protein / lipid-binding START domain-containing protein
Conserved	ptc-miR166m	Potri.001G372300	Potri.011G098300	ATHB-14,ATHB14,PHB,PHB-1D	Homeobox-leucine zipper family protein / lipid-binding START domain-containing protein
Conserved	ptc-miR166q	Potri.001G372300	Potri.011G098300	ATHB-14,ATHB14,PHB,PHB-1D	Homeobox-leucine zipper family protein / lipid-binding START domain-containing protein
Conserved	ptc-miR169ac	Potri.006G201900	Potri.016G068200	NF-YA10	nuclear factor Y, subunit A10
Conserved	ptc-miR169ac	Potri.016G068200	Potri.006G201900	NF-YA10	nuclear factor Y, subunit A10
Conserved	ptc-miR169ad	Potri.006G201900	Potri.016G068200	NF-YA10	nuclear factor Y, subunit A10
Conserved	ptc-miR169ad	Potri.016G068200	Potri.006G201900	NF-YA10	nuclear factor Y, subunit A10
Conserved	ptc-miR169ae	Potri.006G201900	Potri.016G068200	NF-YA10	nuclear factor Y, subunit A10
Conserved	ptc-miR169ae	Potri.016G068200	Potri.006G201900	NF-YA10	nuclear factor Y, subunit A10
Conserved	ptc-miR169af	Potri.006G201900	Potri.016G068200	NF-YA10	nuclear factor Y, subunit A10
Conserved	ptc-miR169af	Potri.016G068200	Potri.006G201900	NF-YA10	nuclear factor Y, subunit A10
Conserved	ptc-miR169q	Potri.006G201900	Potri.016G068200	NF-YA10	nuclear factor Y, subunit A10
Conserved	ptc-miR169q	Potri.016G068200	Potri.006G201900	NF-YA10	nuclear factor Y, subunit A10
Conserved	ptc-miR169u	Potri.006G201900	Potri.016G068200	NF-YA10	nuclear factor Y, subunit A10
Conserved	ptc-miR169u	Potri.016G068200	Potri.006G201900	NF-YA10	nuclear factor Y, subunit A10
Conserved	ptc-miR172a	Potri.006G132400	Potri.016G084500	RAP2.7,TOE1	related to AP2.7
Conserved	ptc-miR172a	Potri.016G084500	Potri.006G132400	RAP2.7,TOE1	related to AP2.7
Conserved	ptc-miR172a	Potri.007G046200	Potri.005G140700	AP2,FL1,FLO2	Integrase-type DNA-binding superfamily protein
Conserved	ptc-miR172a	Potri.015G099400	Potri.012G101200	0	0
Conserved	ptc-miR172c	Potri.006G132400	Potri.016G084500	RAP2.7,TOE1	related to AP2.7
Conserved	ptc-miR172c	Potri.016G084500	Potri.006G132400	RAP2.7,TOE1	related to AP2.7
Conserved	ptc-miR172c	Potri.007G046200	Potri.005G140700	AP2,FL1,FLO2	Integrase-type DNA-binding superfamily protein
Conserved	ptc-miR172c	Potri.015G099400	Potri.012G101200	0	0
Conserved	ptc-miR172f	Potri.006G132400	Potri.016G084500	RAP2.7,TOE1	related to AP2.7
Conserved	ptc-miR172f	Potri.016G084500	Potri.006G132400	RAP2.7,TOE1	related to AP2.7
Conserved	ptc-miR172f	Potri.007G046200	Potri.005G140700	AP2,FL1,FLO2	Integrase-type DNA-binding superfamily protein
Conserved	ptc-miR172f	Potri.015G099400	Potri.012G101200	0	0
Conserved	ptc-miR319a	Potri.001G036000	Potri.003G189700	ATMYB65,MYB65	myb domain protein 65
Conserved	ptc-miR319b	Potri.001G036000	Potri.003G189700	ATMYB65,MYB65	myb domain protein 65
Conserved	ptc-miR319e	Potri.001G036000	Potri.003G189700	ATMYB65,MYB65	myb domain protein 65
Conserved	ptc-miR319f	Potri.001G036000	Potri.003G189700	ATMYB65,MYB65	myb domain protein 65
Conserved	ptc-miR319g	Potri.001G036000	Potri.003G189700	ATMYB65,MYB65	myb domain protein 65
Conserved	ptc-miR319h	Potri.001G036000	Potri.003G189700	ATMYB65,MYB65	myb domain protein 65
Conserved	ptc-miR395a	Potri.012G001400	Potri.015G020000	ANAC100,ATNAC5,NAC100	NAC domain containing protein 100
Conserved	ptc-miR395a	Potri.010G081200	Potri.008G159000	APS3	Pseudouridine synthase/archaeosine transglycosylase-like family protein
Conserved	ptc-miR395b	Potri.010G081200	Potri.008G159000	APS3	Pseudouridine synthase/archaeosine transglycosylase-like family protein
Conserved	ptc-miR395e	Potri.010G081200	Potri.008G159000	APS3	Pseudouridine synthase/archaeosine transglycosylase-like family protein
Conserved	ptc-miR395f	Potri.010G081200	Potri.008G159000	APS3	Pseudouridine synthase/archaeosine transglycosylase-like family protein
Conserved	ptc-miR395k	Potri.010G081200	Potri.008G159000	APS3	Pseudouridine synthase/archaeosine transglycosylase-like family protein
Conserved	ptc-miR399f	Potri.011G052600	Potri.004G043500	ATUBC24,PHO2,UBC24	phosphate 2
Conserved	ptc-miR399f	Potri.011G052600	Potri.004G043500	ATUBC24,PHO2,UBC24	phosphate 2
Conserved	ptc-miR399f	Potri.011G052600	Potri.004G043500	ATUBC24,PHO2,UBC24	phosphate 2
Conserved	ptc-miR399f	Potri.001G415800	Potri.011G131500	0	basic helix-loop-helix (bHLH) DNA-binding superfamily protein
Conserved	ptc-miR399g	Potri.011G052600	Potri.004G043500	ATUBC24,PHO2,UBC24	phosphate 2
Conserved	ptc-miR399g	Potri.011G052600	Potri.004G043500	ATUBC24,PHO2,UBC24	phosphate 2
Conserved	ptc-miR399g	Potri.011G052600	Potri.004G043500	ATUBC24,PHO2,UBC24	phosphate 2
Conserved	ptc-miR399g	Potri.001G415800	Potri.011G131500	0	basic helix-loop-helix (bHLH) DNA-binding superfamily protein
Conserved	ptc-miR399i	Potri.011G052600	Potri.004G043500	ATUBC24,PHO2,UBC24	phosphate 2
Conserved	ptc-miR399i	Potri.011G052600	Potri.004G043500	ATUBC24,PHO2,UBC24	phosphate 2
Conserved	ptc-miR399i	Potri.011G052600	Potri.004G043500	ATUBC24,PHO2,UBC24	phosphate 2
Conserved	ptc-miR403a	Potri.008G103800	Potri.010G146900	SLD5	DNA replication protein-related
Conserved	ptc-miR403b	Potri.008G103800	Potri.010G146900	SLD5	DNA replication protein-related
Conserved	ptc-miR403c	Potri.008G103800	Potri.010G146900	SLD5	DNA replication protein-related
Conserved	ptc-miR403d	Potri.008G103800	Potri.010G146900	SLD5	DNA replication protein-related
Specific	ptc-miR476a	Potri.004G074500	Potri.017G137200	0	Tetratricopeptide repeat (TPR)-like superfamily protein
Specific	ptc-miR478e	Potri.018G086200	Potri.006G163900	0	Leucine-rich repeat (LRR) family protein
Specific	ptc-miR478e	Potri.006G163900	Potri.018G086200	0	Leucine-rich repeat (LRR) family protein
Specific	ptc-miR6445a	Potri.010G121500	Potri.008G123700	ATNDT2,NDT2	NAD+ transporter 2
Specific	ptc-miR6445b	Potri.010G121500	Potri.008G123700	ATNDT2,NDT2	NAD+ transporter 2
Specific	ptc-miR6459a	Potri.003G190300	Potri.001G034500	0	Mitochondrial transcription termination factor family protein
Specific	ptc-miRN7	Potri.004G111500	Potri.017G106300	0	SMAD/FHA domain-containing protein
Specific	ptc-miR1446a	Potri.016G056400	Potri.006G049700	0	Integrase-type DNA-binding superfamily protein
Specific	ptc-miR1446b	Potri.016G056400	Potri.006G049700	0	Integrase-type DNA-binding superfamily protein
Specific	ptc-miR1446c	Potri.016G056400	Potri.006G049700	0	Integrase-type DNA-binding superfamily protein
Specific	ptc-miR1446d	Potri.016G056400	Potri.006G049700	0	Integrase-type DNA-binding superfamily protein
Specific	ptc-miR1446e	Potri.016G056400	Potri.006G049700	0	Integrase-type DNA-binding superfamily protein
Specific	ptc-miR1448	Potri.011G067000	Potri.004G057800	0	Protein of unknown function (DUF688)
Conserved	ptc-miR156a	Potri.012G100700	Potri.015G098900	0	Squamosa promoter-binding protein-like (SBP domain) transcription factor family protein
Conserved	ptc-miR156a	Potri.001G294400	Potri.009G088900	ATVSR3,BP80-2;2,VSR2;2,VSR3	vaculolar sorting receptor 3
Conserved	ptc-miR156b	Potri.012G100700	Potri.015G098900	0	Squamosa promoter-binding protein-like (SBP domain) transcription factor family protein
Conserved	ptc-miR156b	Potri.001G294400	Potri.009G088900	ATVSR3,BP80-2;2,VSR2;2,VSR3	vaculolar sorting receptor 3
Conserved	ptc-miR156c	Potri.012G100700	Potri.015G098900	0	Squamosa promoter-binding protein-like (SBP domain) transcription factor family protein
Conserved	ptc-miR156c	Potri.001G294400	Potri.009G088900	ATVSR3,BP80-2;2,VSR2;2,VSR3	vaculolar sorting receptor 3
Conserved	ptc-miR156d	Potri.012G100700	Potri.015G098900	0	Squamosa promoter-binding protein-like (SBP domain) transcription factor family protein
Conserved	ptc-miR156d	Potri.001G294400	Potri.009G088900	ATVSR3,BP80-2;2,VSR2;2,VSR3	vaculolar sorting receptor 3
Conserved	ptc-miR156e	Potri.012G100700	Potri.015G098900	0	Squamosa promoter-binding protein-like (SBP domain) transcription factor family protein
Conserved	ptc-miR156e	Potri.001G294400	Potri.009G088900	ATVSR3,BP80-2;2,VSR2;2,VSR3	vaculolar sorting receptor 3
Conserved	ptc-miR156f	Potri.012G100700	Potri.015G098900	0	Squamosa promoter-binding protein-like (SBP domain) transcription factor family protein
Conserved	ptc-miR156f	Potri.001G294400	Potri.009G088900	ATVSR3,BP80-2;2,VSR2;2,VSR3	vaculolar sorting receptor 3
Conserved	ptc-miR156j	Potri.002G105400	Potri.005G156400	0	0
Conserved	ptc-miR159a	Potri.001G409000	Potri.T024300	0	0
Conserved	ptc-miR159a	Potri.T024300	Potri.001G409000	0	0
Conserved	ptc-miR159b	Potri.001G409000	Potri.T024300	0	0
Conserved	ptc-miR159b	Potri.T024300	Potri.001G409000	0	0
Conserved	ptc-miR162a	Potri.003G147900	Potri.001G082600	BLT	branchless trichome
Conserved	ptc-miR162b	Potri.003G147900	Potri.001G082600	BLT	branchless trichome
Conserved	ptc-miR164a	Potri.010G207200	Potri.008G053100	UXS6	UDP-XYL synthase 6
Conserved	ptc-miR164b	Potri.010G207200	Potri.008G053100	UXS6	UDP-XYL synthase 6
Conserved	ptc-miR164c	Potri.010G207200	Potri.008G053100	UXS6	UDP-XYL synthase 6
Conserved	ptc-miR164d	Potri.010G207200	Potri.008G053100	UXS6	UDP-XYL synthase 6
Conserved	ptc-miR166p	Potri.003G050100	Potri.001G188800	ATHB-15,ATHB15,CNA,ICU4	Homeobox-leucine zipper family protein / lipid-binding START domain-containing protein
Conserved	ptc-miR166p	Potri.001G188800	Potri.003G050100	ATHB-15,ATHB15,CNA,ICU4	Homeobox-leucine zipper family protein / lipid-binding START domain-containing protein
Conserved	ptc-miR167a	Potri.014G114300	Potri.002G188700	SPL12	squamosa promoter-binding protein-like 12
Conserved	ptc-miR167b	Potri.014G114300	Potri.002G188700	SPL12	squamosa promoter-binding protein-like 12
Conserved	ptc-miR167c	Potri.014G114300	Potri.002G188700	SPL12	squamosa promoter-binding protein-like 12
Conserved	ptc-miR167d	Potri.014G114300	Potri.002G188700	SPL12	squamosa promoter-binding protein-like 12
Conserved	ptc-miR167f	Potri.014G114300	Potri.002G188700	SPL12	squamosa promoter-binding protein-like 12
Conserved	ptc-miR167g	Potri.014G114300	Potri.002G188700	SPL12	squamosa promoter-binding protein-like 12
Conserved	ptc-miR169i	Potri.006G201900	Potri.016G068200	NF-YA10	nuclear factor Y, subunit A10
Conserved	ptc-miR169i	Potri.016G068200	Potri.006G201900	NF-YA10	nuclear factor Y, subunit A10
Conserved	ptc-miR169j	Potri.006G201900	Potri.016G068200	NF-YA10	nuclear factor Y, subunit A10
Conserved	ptc-miR169j	Potri.016G068200	Potri.006G201900	NF-YA10	nuclear factor Y, subunit A10
Conserved	ptc-miR169k	Potri.006G201900	Potri.016G068200	NF-YA10	nuclear factor Y, subunit A10
Conserved	ptc-miR169k	Potri.016G068200	Potri.006G201900	NF-YA10	nuclear factor Y, subunit A10
Conserved	ptc-miR169l	Potri.006G201900	Potri.016G068200	NF-YA10	nuclear factor Y, subunit A10
Conserved	ptc-miR169l	Potri.016G068200	Potri.006G201900	NF-YA10	nuclear factor Y, subunit A10
Conserved	ptc-miR169m	Potri.006G201900	Potri.016G068200	NF-YA10	nuclear factor Y, subunit A10
Conserved	ptc-miR169m	Potri.016G068200	Potri.006G201900	NF-YA10	nuclear factor Y, subunit A10
Conserved	ptc-miR3627a	Potri.012G095300	Potri.015G092800	ADK1	adenylate kinase 1
Conserved	ptc-miR395a	Potri.014G040400	Potri.002G133000	0	RING/U-box superfamily protein
Conserved	ptc-miR395a	Potri.007G108900	Potri.005G059800	0	0
Conserved	ptc-miR395a	Potri.001G237300	Potri.009G028600	0	0
Conserved	ptc-miR395a	Potri.004G150700	Potri.009G112100	0	transducin family protein / WD-40 repeat family protein
Conserved	ptc-miR395b	Potri.002G092400	Potri.005G169300	AST56,SULTR2;2	STAS domain / Sulfate transporter family
Conserved	ptc-miR395b	Potri.001G237300	Potri.009G028600	0	0
Conserved	ptc-miR395e	Potri.002G092400	Potri.005G169300	AST56,SULTR2;2	STAS domain / Sulfate transporter family
Conserved	ptc-miR395e	Potri.001G237300	Potri.009G028600	0	0
Conserved	ptc-miR395f	Potri.002G092400	Potri.005G169300	AST56,SULTR2;2	STAS domain / Sulfate transporter family
Conserved	ptc-miR395f	Potri.001G237300	Potri.009G028600	0	0
Conserved	ptc-miR395k	Potri.002G092400	Potri.005G169300	AST56,SULTR2;2	STAS domain / Sulfate transporter family
Conserved	ptc-miR395k	Potri.001G237300	Potri.009G028600	0	0
Conserved	ptc-miR398a	Potri.010G046100	Potri.008G186800	0	Nucleotide-diphospho-sugar transferase family protein
Conserved	ptc-miR399i	Potri.001G415800	Potri.011G131500	0	basic helix-loop-helix (bHLH) DNA-binding superfamily protein
Conserved	ptc-miR403a	Potri.012G069300	Potri.015G062700	ATHVA22A,HVA22A	HVA22 homologue A
Conserved	ptc-miR403b	Potri.012G069300	Potri.015G062700	ATHVA22A,HVA22A	HVA22 homologue A
Conserved	ptc-miR403c	Potri.012G069300	Potri.015G062700	ATHVA22A,HVA22A	HVA22 homologue A
Conserved	ptc-miR403d	Potri.012G069300	Potri.015G062700	ATHVA22A,HVA22A	HVA22 homologue A
Specific	ptc-miR478e	Potri.005G049000	Potri.013G035700	0	Rubredoxin-like superfamily protein
Specific	ptc-miR6438b	Potri.005G140900	Potri.007G046500	DEAR2	DREB and EAR motif protein 2
Specific	ptc-miR6445a	Potri.001G324800	Potri.017G063000	0	hydroxyproline-rich glycoprotein family protein
Specific	ptc-miR6445b	Potri.001G324800	Potri.017G063000	0	hydroxyproline-rich glycoprotein family protein
Specific	ptc-miR6459a	Potri.004G037200	Potri.011G045700	0	0
Specific	ptc-miR6459b	Potri.003G217800	Potri.001G007900	0	P-loop containing nucleoside triphosphate hydrolases superfamily protein
Specific	ptc-miR6459b	Potri.001G007900	Potri.003G217800	0	P-loop containing nucleoside triphosphate hydrolases superfamily protein
Specific	ptc-miR7817a	Potri.003G128000	Potri.001G103600	GL3,MYC6.2	basic helix-loop-helix (bHLH) DNA-binding superfamily protein
Specific	ptc-miRN10	Potri.003G085300	Potri.001G149100;Potri.T132900	0	Protein kinase superfamily protein
Specific	ptc-miRN18	Potri.001G068200	Potri.003G161900	0	Aldolase-type TIM barrel family protein
Specific	ptc-miRN18	Potri.003G161900	Potri.001G068200	0	Aldolase-type TIM barrel family protein
Specific	ptc-miRN18	Potri.001G421300	Potri.011G136900	POLGAMMA2	polymerase gamma 2
Specific	ptc-miRN20	Potri.003G096000	Potri.001G137800	HB-7,HDG5	homeobox-7
Specific	ptc-miRN5	Potri.002G164400	Potri.014G096200;Potri.014G090300	AtWRKY22,WRKY22	WRKY family transcription factor
Specific	ptc-miR1446a	Potri.012G093900	Potri.015G091200	RGL,RGL1	RGA-like 1
Specific	ptc-miR1446b	Potri.012G093900	Potri.015G091200	RGL,RGL1	RGA-like 1
Specific	ptc-miR1446c	Potri.012G093900	Potri.015G091200	RGL,RGL1	RGA-like 1
Specific	ptc-miR1446d	Potri.012G093900	Potri.015G091200	RGL,RGL1	RGA-like 1
Specific	ptc-miR1446e	Potri.012G093900	Potri.015G091200	RGL,RGL1	RGA-like 1
Specific	ptc-miR1448	Potri.001G000600	Potri.003G224100	sks12	SKU5 similar 12
Specific	ptc-miR1448	Potri.004G057800	Potri.011G067000	0	Protein of unknown function (DUF688)
Conserved	ptc-miR156a	Potri.004G021500	Potri.011G026600	UBQ10	polyubiquitin 10
Conserved	ptc-miR156a	Potri.018G029300	Potri.006G252000	0	Alba DNA/RNA-binding protein
Conserved	ptc-miR156b	Potri.004G021500	Potri.011G026600	UBQ10	polyubiquitin 10
Conserved	ptc-miR156b	Potri.018G029300	Potri.006G252000	0	Alba DNA/RNA-binding protein
Conserved	ptc-miR156c	Potri.004G021500	Potri.011G026600	UBQ10	polyubiquitin 10
Conserved	ptc-miR156c	Potri.018G029300	Potri.006G252000	0	Alba DNA/RNA-binding protein
Conserved	ptc-miR156d	Potri.004G021500	Potri.011G026600	UBQ10	polyubiquitin 10
Conserved	ptc-miR156d	Potri.018G029300	Potri.006G252000	0	Alba DNA/RNA-binding protein
Conserved	ptc-miR156e	Potri.004G021500	Potri.011G026600	UBQ10	polyubiquitin 10
Conserved	ptc-miR156e	Potri.018G029300	Potri.006G252000	0	Alba DNA/RNA-binding protein
Conserved	ptc-miR156f	Potri.004G021500	Potri.011G026600	UBQ10	polyubiquitin 10
Conserved	ptc-miR156f	Potri.018G029300	Potri.006G252000	0	Alba DNA/RNA-binding protein
Conserved	ptc-miR156g	Potri.013G043700	Potri.019G013100	AN3,ATGIF1,GIF,GIF1	SSXT family protein
Conserved	ptc-miR156g	Potri.002G105400	Potri.005G156400	0	0
Conserved	ptc-miR156g	Potri.007G138800	Potri.017G012900	SPL4	squamosa promoter binding protein-like 4
Conserved	ptc-miR156g	Potri.012G100700	Potri.015G098900	0	Squamosa promoter-binding protein-like (SBP domain) transcription factor family protein
Conserved	ptc-miR156g	Potri.002G142400	Potri.014G057800	SPL11	squamosa promoter-like 11
Conserved	ptc-miR156g	Potri.015G098900	Potri.012G100700	0	Squamosa promoter-binding protein-like (SBP domain) transcription factor family protein
Conserved	ptc-miR156g	Potri.014G057800	Potri.002G142400	SPL10	squamosa promoter binding protein-like 10
Conserved	ptc-miR156g	Potri.001G058600	Potri.003G169400	0	Squamosa promoter-binding protein-like (SBP domain) transcription factor family protein
Conserved	ptc-miR156g	Potri.003G169400	Potri.001G058600	0	Squamosa promoter-binding protein-like (SBP domain) transcription factor family protein
Conserved	ptc-miR156g	Potri.012G131300	Potri.015G133100	AAT1,CAT1	amino acid transporter 1
Conserved	ptc-miR156g	Potri.019G103100	Potri.013G144100	0	Protein phosphatase 2C family protein
Conserved	ptc-miR156g	Potri.001G398200	Potri.011G116800	SPL5	squamosa promoter binding protein-like 5
Conserved	ptc-miR156g	Potri.011G116800	Potri.001G398200	SPL5	squamosa promoter binding protein-like 5
Conserved	ptc-miR156h	Potri.002G142400	Potri.014G057800	SPL11	squamosa promoter-like 11
Conserved	ptc-miR156h	Potri.015G098900	Potri.012G100700	0	Squamosa promoter-binding protein-like (SBP domain) transcription factor family protein
Conserved	ptc-miR156h	Potri.014G057800	Potri.002G142400	SPL10	squamosa promoter binding protein-like 10
Conserved	ptc-miR156h	Potri.001G058600	Potri.003G169400	0	Squamosa promoter-binding protein-like (SBP domain) transcription factor family protein
Conserved	ptc-miR156h	Potri.003G169400	Potri.001G058600	0	Squamosa promoter-binding protein-like (SBP domain) transcription factor family protein
Conserved	ptc-miR156h	Potri.007G138800	Potri.017G012900	SPL4	squamosa promoter binding protein-like 4
Conserved	ptc-miR156h	Potri.012G131300	Potri.015G133100	AAT1,CAT1	amino acid transporter 1
Conserved	ptc-miR156h	Potri.002G105400	Potri.005G156400	0	0
Conserved	ptc-miR156h	Potri.001G398200	Potri.011G116800	SPL5	squamosa promoter binding protein-like 5
Conserved	ptc-miR156h	Potri.011G116800	Potri.001G398200	SPL5	squamosa promoter binding protein-like 5
Conserved	ptc-miR156h	Potri.012G100700	Potri.015G098900	0	Squamosa promoter-binding protein-like (SBP domain) transcription factor family protein
Conserved	ptc-miR156h	Potri.013G043700	Potri.019G013100	AN3,ATGIF1,GIF,GIF1	SSXT family protein
Conserved	ptc-miR156h	Potri.019G103100	Potri.013G144100	0	Protein phosphatase 2C family protein
Conserved	ptc-miR156j	Potri.012G100700	Potri.015G098900	0	Squamosa promoter-binding protein-like (SBP domain) transcription factor family protein
Conserved	ptc-miR156j	Potri.013G043700	Potri.019G013100	AN3,ATGIF1,GIF,GIF1	SSXT family protein
Conserved	ptc-miR156j	Potri.001G076100	Potri.003G154600	CAT5	cationic amino acid transporter 5
Conserved	ptc-miR156j	Potri.003G154600	Potri.001G076100	CAT5	cationic amino acid transporter 5
Conserved	ptc-miR156j	Potri.006G178500	Potri.018G100400	GAE1	UDP-D-glucuronate 4-epimerase 1
Conserved	ptc-miR156j	Potri.001G398200	Potri.011G116800	SPL5	squamosa promoter binding protein-like 5
Conserved	ptc-miR156j	Potri.011G116800	Potri.001G398200	SPL5	squamosa promoter binding protein-like 5
Conserved	ptc-miR156j	Potri.014G022800	Potri.002G122700	EDA9	D-3-phosphoglycerate dehydrogenase
Conserved	ptc-miR159a	Potri.009G018700	Potri.001G224500	ATMYB33,MYB33	myb domain protein 33
Conserved	ptc-miR159a	Potri.001G036000	Potri.003G189700	ATMYB65,MYB65	myb domain protein 65
Conserved	ptc-miR159a	Potri.001G013800	Potri.003G212300	0	Emsy N Terminus (ENT)/ plant Tudor-like domains-containing protein
Conserved	ptc-miR159a	Potri.016G044100	Potri.006G047900	ATCKX1,CKX1	cytokinin oxidase/dehydrogenase 1
Conserved	ptc-miR159a	Potri.006G047900	Potri.016G044100	ATCKX1,CKX1	cytokinin oxidase/dehydrogenase 1
Conserved	ptc-miR159b	Potri.009G018700	Potri.001G224500	ATMYB33,MYB33	myb domain protein 33
Conserved	ptc-miR159b	Potri.001G036000	Potri.003G189700	ATMYB65,MYB65	myb domain protein 65
Conserved	ptc-miR159b	Potri.001G013800	Potri.003G212300	0	Emsy N Terminus (ENT)/ plant Tudor-like domains-containing protein
Conserved	ptc-miR159b	Potri.016G044100	Potri.006G047900	ATCKX1,CKX1	cytokinin oxidase/dehydrogenase 1
Conserved	ptc-miR159b	Potri.006G047900	Potri.016G044100	ATCKX1,CKX1	cytokinin oxidase/dehydrogenase 1
Conserved	ptc-miR159c	Potri.017G017600	Potri.007G134500	ATMYB52,BW52,MYB52	myb domain protein 52
Conserved	ptc-miR159c	Potri.002G049700	Potri.005G213200	0	Protein kinase superfamily protein
Conserved	ptc-miR159d	Potri.001G036000	Potri.003G189700	ATMYB65,MYB65	myb domain protein 65
Conserved	ptc-miR159d	Potri.019G083700	Potri.013G113100	0	DNAJ heat shock N-terminal domain-containing protein
Conserved	ptc-miR159d	Potri.010G157700	Potri.008G096900	0	Asparagine synthase family protein
Conserved	ptc-miR159d	Potri.009G018700	Potri.001G224500	ATMYB33,MYB33	myb domain protein 33
Conserved	ptc-miR159d	Potri.008G071700	Potri.010G185700;	0	Homeodomain-like superfamily protein
Conserved	ptc-miR160a	Potri.017G031700	Potri.007G127300	0	S-adenosyl-L-methionine-dependent methyltransferases superfamily protein
Conserved	ptc-miR160d	Potri.017G031700	Potri.007G127300	0	S-adenosyl-L-methionine-dependent methyltransferases superfamily protein
Conserved	ptc-miR164a	Potri.002G070300	Potri.005G190000	0	Regulator of chromosome condensation (RCC1) family with FYVE zinc finger domain
Conserved	ptc-miR164a	Potri.004G172100	Potri.009G131700	FIO1	methyltransferases
Conserved	ptc-miR164b	Potri.002G070300	Potri.005G190000	0	Regulator of chromosome condensation (RCC1) family with FYVE zinc finger domain
Conserved	ptc-miR164b	Potri.004G172100	Potri.009G131700	FIO1	methyltransferases
Conserved	ptc-miR164c	Potri.002G070300	Potri.005G190000	0	Regulator of chromosome condensation (RCC1) family with FYVE zinc finger domain
Conserved	ptc-miR164c	Potri.004G172100	Potri.009G131700	FIO1	methyltransferases
Conserved	ptc-miR164d	Potri.002G070300	Potri.005G190000	0	Regulator of chromosome condensation (RCC1) family with FYVE zinc finger domain
Conserved	ptc-miR164d	Potri.004G172100	Potri.009G131700	FIO1	methyltransferases
Conserved	ptc-miR166a	Potri.T078200	Potri.007G133400	0	Plant regulator RWP-RK family protein
Conserved	ptc-miR166b	Potri.T078200	Potri.007G133400	0	Plant regulator RWP-RK family protein
Conserved	ptc-miR166c	Potri.T078200	Potri.007G133400	0	Plant regulator RWP-RK family protein
Conserved	ptc-miR166d	Potri.T078200	Potri.007G133400	0	Plant regulator RWP-RK family protein
Conserved	ptc-miR166e	Potri.T078200	Potri.007G133400	0	Plant regulator RWP-RK family protein
Conserved	ptc-miR166f	Potri.T078200	Potri.007G133400	0	Plant regulator RWP-RK family protein
Conserved	ptc-miR166g	Potri.T078200	Potri.007G133400	0	Plant regulator RWP-RK family protein
Conserved	ptc-miR166h	Potri.T078200	Potri.007G133400	0	Plant regulator RWP-RK family protein
Conserved	ptc-miR166i	Potri.T078200	Potri.007G133400	0	Plant regulator RWP-RK family protein
Conserved	ptc-miR166j	Potri.T078200	Potri.007G133400	0	Plant regulator RWP-RK family protein
Conserved	ptc-miR166k	Potri.T078200	Potri.007G133400	0	Plant regulator RWP-RK family protein
Conserved	ptc-miR166l	Potri.T078200	Potri.007G133400	0	Plant regulator RWP-RK family protein
Conserved	ptc-miR166m	Potri.T078200	Potri.007G133400	0	Plant regulator RWP-RK family protein
Conserved	ptc-miR166p	Potri.001G003900	Potri.003G221100	ATDEK1,DEK1,EMB1275,EMB80	calpain-type cysteine protease family
Conserved	ptc-miR166p	Potri.003G221100	Potri.001G003900	ATDEK1,DEK1,EMB1275,EMB80	calpain-type cysteine protease family
Conserved	ptc-miR166p	Potri.003G076600	Potri.001G158200	OWL1	DNAJ heat shock N-terminal domain-containing protein
Conserved	ptc-miR166q	Potri.T078200	Potri.007G133400	0	Plant regulator RWP-RK family protein
Conserved	ptc-miR167h	Potri.014G114300	Potri.002G188700	SPL12	squamosa promoter-binding protein-like 12
Conserved	ptc-miR169aa	Potri.008G038800	Potri.010G223400	0	Pleckstrin homology (PH) and lipid-binding START domains-containing protein
Conserved	ptc-miR169i	Potri.001G266000	Potri.009G060600;Potri.009G052900	ATHAP2A,EMB2220,HAP2A,NF-YA1	nuclear factor Y, subunit A1
Conserved	ptc-miR169i	Potri.009G060600	Potri.001G266000	ATHAP2A,EMB2220,HAP2A,NF-YA1	nuclear factor Y, subunit A1
Conserved	ptc-miR169i	Potri.002G184000	Potri.014G109600	0	0
Conserved	ptc-miR169i	Potri.009G052900	Potri.001G257600;Potri.001G266000	ATHAP2A,EMB2220,HAP2A,NF-YA1	nuclear factor Y, subunit A1
Conserved	ptc-miR169i	Potri.001G257600	Potri.009G052900	ATHAP2A,EMB2220,HAP2A,NF-YA1	nuclear factor Y, subunit A1
Conserved	ptc-miR169i	Potri.006G053500	Potri.016G054100	NF-YA6	nuclear factor Y, subunit A6
Conserved	ptc-miR169j	Potri.001G266000	Potri.009G060600;Potri.009G052900	ATHAP2A,EMB2220,HAP2A,NF-YA1	nuclear factor Y, subunit A1
Conserved	ptc-miR169j	Potri.009G060600	Potri.001G266000	ATHAP2A,EMB2220,HAP2A,NF-YA1	nuclear factor Y, subunit A1
Conserved	ptc-miR169j	Potri.002G184000	Potri.014G109600	0	0
Conserved	ptc-miR169j	Potri.009G052900	Potri.001G257600;Potri.001G266000	ATHAP2A,EMB2220,HAP2A,NF-YA1	nuclear factor Y, subunit A1
Conserved	ptc-miR169j	Potri.001G257600	Potri.009G052900	ATHAP2A,EMB2220,HAP2A,NF-YA1	nuclear factor Y, subunit A1
Conserved	ptc-miR169j	Potri.006G053500	Potri.016G054100	NF-YA6	nuclear factor Y, subunit A6
Conserved	ptc-miR169k	Potri.001G266000	Potri.009G060600;Potri.009G052900	ATHAP2A,EMB2220,HAP2A,NF-YA1	nuclear factor Y, subunit A1
Conserved	ptc-miR169k	Potri.009G060600	Potri.001G266000	ATHAP2A,EMB2220,HAP2A,NF-YA1	nuclear factor Y, subunit A1
Conserved	ptc-miR169k	Potri.002G184000	Potri.014G109600	0	0
Conserved	ptc-miR169k	Potri.009G052900	Potri.001G257600;Potri.001G266000	ATHAP2A,EMB2220,HAP2A,NF-YA1	nuclear factor Y, subunit A1
Conserved	ptc-miR169k	Potri.001G257600	Potri.009G052900	ATHAP2A,EMB2220,HAP2A,NF-YA1	nuclear factor Y, subunit A1
Conserved	ptc-miR169k	Potri.006G053500	Potri.016G054100	NF-YA6	nuclear factor Y, subunit A6
Conserved	ptc-miR169l	Potri.001G266000	Potri.009G060600;Potri.009G052900	ATHAP2A,EMB2220,HAP2A,NF-YA1	nuclear factor Y, subunit A1
Conserved	ptc-miR169l	Potri.009G060600	Potri.001G266000	ATHAP2A,EMB2220,HAP2A,NF-YA1	nuclear factor Y, subunit A1
Conserved	ptc-miR169l	Potri.002G184000	Potri.014G109600	0	0
Conserved	ptc-miR169l	Potri.009G052900	Potri.001G257600;Potri.001G266000	ATHAP2A,EMB2220,HAP2A,NF-YA1	nuclear factor Y, subunit A1
Conserved	ptc-miR169l	Potri.001G257600	Potri.009G052900	ATHAP2A,EMB2220,HAP2A,NF-YA1	nuclear factor Y, subunit A1
Conserved	ptc-miR169l	Potri.006G053500	Potri.016G054100	NF-YA6	nuclear factor Y, subunit A6
Conserved	ptc-miR169m	Potri.001G266000	Potri.009G060600;Potri.009G052900	ATHAP2A,EMB2220,HAP2A,NF-YA1	nuclear factor Y, subunit A1
Conserved	ptc-miR169m	Potri.009G060600	Potri.001G266000	ATHAP2A,EMB2220,HAP2A,NF-YA1	nuclear factor Y, subunit A1
Conserved	ptc-miR169m	Potri.002G184000	Potri.014G109600	0	0
Conserved	ptc-miR169m	Potri.009G052900	Potri.001G257600;Potri.001G266000	ATHAP2A,EMB2220,HAP2A,NF-YA1	nuclear factor Y, subunit A1
Conserved	ptc-miR169m	Potri.001G257600	Potri.009G052900	ATHAP2A,EMB2220,HAP2A,NF-YA1	nuclear factor Y, subunit A1
Conserved	ptc-miR169m	Potri.006G053500	Potri.016G054100	NF-YA6	nuclear factor Y, subunit A6
Conserved	ptc-miR171c	Potri.001G168400	Potri.003G065900	0	0
Conserved	ptc-miR171d	Potri.001G168400	Potri.003G065900	0	0
Conserved	ptc-miR171i	Potri.008G017400	Potri.010G241300	0	pentatricopeptide (PPR) repeat-containing protein
Conserved	ptc-miR172a	Potri.016G072900	Potri.006G205500	ATOFP13,OFP13	ovate family protein 13
Conserved	ptc-miR172a	Potri.010G051900	Potri.008G182000	ALB4,ARTEMIS	OxaA/YidC-like membrane insertion protein
Conserved	ptc-miR172c	Potri.016G072900	Potri.006G205500	ATOFP13,OFP13	ovate family protein 13
Conserved	ptc-miR172c	Potri.010G051900	Potri.008G182000	ALB4,ARTEMIS	OxaA/YidC-like membrane insertion protein
Conserved	ptc-miR172f	Potri.016G072900	Potri.006G205500	ATOFP13,OFP13	ovate family protein 13
Conserved	ptc-miR172f	Potri.010G051900	Potri.008G182000	ALB4,ARTEMIS	OxaA/YidC-like membrane insertion protein
Conserved	ptc-miR319a	Potri.009G018700	Potri.001G224500	ATMYB33,MYB33	myb domain protein 33
Conserved	ptc-miR319a	Potri.002G140900	Potri.014G053500	DUO1	myb-like HTH transcriptional regulator family protein
Conserved	ptc-miR319b	Potri.009G018700	Potri.001G224500	ATMYB33,MYB33	myb domain protein 33
Conserved	ptc-miR319b	Potri.002G140900	Potri.014G053500	DUO1	myb-like HTH transcriptional regulator family protein
Conserved	ptc-miR319e	Potri.009G018700	Potri.001G224500	ATMYB33,MYB33	myb domain protein 33
Conserved	ptc-miR319e	Potri.002G140900	Potri.014G053500	DUO1	myb-like HTH transcriptional regulator family protein
Conserved	ptc-miR319f	Potri.002G140900	Potri.014G053500	DUO1	myb-like HTH transcriptional regulator family protein
Conserved	ptc-miR319g	Potri.002G140900	Potri.014G053500	DUO1	myb-like HTH transcriptional regulator family protein
Conserved	ptc-miR319h	Potri.009G018700	Potri.001G224500	ATMYB33,MYB33	myb domain protein 33
Conserved	ptc-miR319h	Potri.002G140900	Potri.014G053500	DUO1	myb-like HTH transcriptional regulator family protein
Conserved	ptc-miR3627a	Potri.012G108600	Potri.015G106600	TXR1	Protein Transporter, Pam16
Conserved	ptc-miR390a	Potri.012G022800	Potri.015G023500;;Potri.015G037400	ATPEPR1,PEPR1	PEP1 receptor 1
Conserved	ptc-miR390a	Potri.010G160700	Potri.008G093400	0	Leucine-rich repeat (LRR) family protein
Conserved	ptc-miR390b	Potri.012G022800	Potri.015G023500;;Potri.015G037400	ATPEPR1,PEPR1	PEP1 receptor 1
Conserved	ptc-miR390b	Potri.010G160700	Potri.008G093400	0	Leucine-rich repeat (LRR) family protein
Conserved	ptc-miR390c	Potri.012G022800	Potri.015G023500;;Potri.015G037400	ATPEPR1,PEPR1	PEP1 receptor 1
Conserved	ptc-miR390c	Potri.010G160700	Potri.008G093400	0	Leucine-rich repeat (LRR) family protein
Conserved	ptc-miR390d	Potri.012G022800	Potri.015G023500;;Potri.015G037400	ATPEPR1,PEPR1	PEP1 receptor 1
Conserved	ptc-miR390d	Potri.010G160700	Potri.008G093400	0	Leucine-rich repeat (LRR) family protein
Conserved	ptc-miR394a	Potri.010G101100	Potri.008G068700;Potri.008G140500;Potri.008G144700;Potri.008G137800	BRL2,VH1	BRI1-like 2
Conserved	ptc-miR394b	Potri.010G101100	Potri.008G068700;Potri.008G140500;Potri.008G144700;Potri.008G137800	BRL2,VH1	BRI1-like 2
Conserved	ptc-miR395a	Potri.008G034900	Potri.010G227600	0	0
Conserved	ptc-miR395a	Potri.016G083900	Potri.006G133000	0	Homeodomain-like superfamily protein
Conserved	ptc-miR395a	Potri.007G108800	Potri.005G059900	0	0
Conserved	ptc-miR395a	Potri.008G133500	Potri.010G108100	PDLP6	plasmodesmata-located protein 6
Conserved	ptc-miR395a	Potri.006G166500	Potri.018G091100	0	Transducin/WD40 repeat-like superfamily protein
Conserved	ptc-miR396a	Potri.012G094500	Potri.015G092000	MLS	malate synthase
Conserved	ptc-miR396a	Potri.014G161200	Potri.002G219000	0	Calcium-binding EF-hand family protein
Conserved	ptc-miR396b	Potri.012G094500	Potri.015G092000	MLS	malate synthase
Conserved	ptc-miR396b	Potri.014G161200	Potri.002G219000	0	Calcium-binding EF-hand family protein
Conserved	ptc-miR396c	Potri.012G094500	Potri.015G092000	MLS	malate synthase
Conserved	ptc-miR396c	Potri.014G161200	Potri.002G219000	0	Calcium-binding EF-hand family protein
Conserved	ptc-miR396e	Potri.012G094500	Potri.015G092000	MLS	malate synthase
Conserved	ptc-miR396e	Potri.014G161200	Potri.002G219000	0	Calcium-binding EF-hand family protein
Conserved	ptc-miR396f	Potri.011G137800	Potri.001G424500	CYP716A1	cytochrome P450, family 716, subfamily A, polypeptide 1
Conserved	ptc-miR396f	Potri.013G092000	Potri.019G066300	0	RING/FYVE/PHD zinc finger superfamily protein
Conserved	ptc-miR396f	Potri.004G001400	Potri.011G023300	0	Protein of unknown function (DUF506)
Conserved	ptc-miR396g	Potri.011G137800	Potri.001G424500	CYP716A1	cytochrome P450, family 716, subfamily A, polypeptide 1
Conserved	ptc-miR396g	Potri.013G092000	Potri.019G066300	0	RING/FYVE/PHD zinc finger superfamily protein
Conserved	ptc-miR396g	Potri.004G001400	Potri.011G023300	0	Protein of unknown function (DUF506)
Conserved	ptc-miR399f	Potri.011G052600	Potri.004G043500	ATUBC24,PHO2,UBC24	phosphate 2
Conserved	ptc-miR399f	Potri.011G052600	Potri.004G043500	ATUBC24,PHO2,UBC24	phosphate 2
Conserved	ptc-miR399g	Potri.011G052600	Potri.004G043500	ATUBC24,PHO2,UBC24	phosphate 2
Conserved	ptc-miR399g	Potri.011G052600	Potri.004G043500	ATUBC24,PHO2,UBC24	phosphate 2
Conserved	ptc-miR399h	Potri.006G031700	Potri.016G028900	DPE2	disproportionating enzyme 2
Conserved	ptc-miR399h	Potri.011G052600	Potri.004G043500	ATUBC24,PHO2,UBC24	phosphate 2
Conserved	ptc-miR399h	Potri.011G052600	Potri.004G043500	ATUBC24,PHO2,UBC24	phosphate 2
Conserved	ptc-miR399h	Potri.011G052600	Potri.004G043500	ATUBC24,PHO2,UBC24	phosphate 2
Conserved	ptc-miR399i	Potri.011G052600	Potri.004G043500	ATUBC24,PHO2,UBC24	phosphate 2
Conserved	ptc-miR399i	Potri.011G052600	Potri.004G043500	ATUBC24,PHO2,UBC24	phosphate 2
Conserved	ptc-miR403a	Potri.010G085500	Potri.008G155000	CDC73,PHP	PLANT HOMOLOGOUS TO PARAFIBROMIN
Conserved	ptc-miR403a	Potri.004G074300	Potri.017G144800	RVE1	Homeodomain-like superfamily protein
Conserved	ptc-miR403b	Potri.010G085500	Potri.008G155000	CDC73,PHP	PLANT HOMOLOGOUS TO PARAFIBROMIN
Conserved	ptc-miR403b	Potri.004G074300	Potri.017G144800	RVE1	Homeodomain-like superfamily protein
Conserved	ptc-miR403c	Potri.010G085500	Potri.008G155000	CDC73,PHP	PLANT HOMOLOGOUS TO PARAFIBROMIN
Conserved	ptc-miR403c	Potri.004G074300	Potri.017G144800	RVE1	Homeodomain-like superfamily protein
Conserved	ptc-miR403d	Potri.010G085500	Potri.008G155000	CDC73,PHP	PLANT HOMOLOGOUS TO PARAFIBROMIN
Conserved	ptc-miR403d	Potri.004G074300	Potri.017G144800	RVE1	Homeodomain-like superfamily protein
Conserved	ptc-miR408	Potri.018G037000	Potri.006G243200	0	P-loop containing nucleoside triphosphate hydrolases superfamily protein
Conserved	ptc-miR408	Potri.006G243200	Potri.018G037000	0	P-loop containing nucleoside triphosphate hydrolases superfamily protein
Conserved	ptc-miR408	Potri.012G100900	Potri.015G099100	0	0
Specific	ptc-miR476a	Potri.007G028000	Potri.005G125200	ATOFP7,OFP7	ovate family protein 7
Specific	ptc-miR476a	Potri.014G080000	Potri.002G156300	0	NAD(P)-binding Rossmann-fold superfamily protein
Specific	ptc-miR478e	Potri.008G060200	Potri.010G198400	P5CS2	delta 1-pyrroline-5-carboxylate synthase 2
Specific	ptc-miR478e	Potri.012G141200	Potri.015G143800	0	Myosin heavy chain-related protein
Conserved	ptc-miR530a	Potri.010G105600	Potri.008G135500	ARR2,RR2	response regulator 2
Conserved	ptc-miR530a	Potri.006G180500	Potri.018G102800	0	0
Conserved	ptc-miR530a	Potri.018G102800	Potri.006G180500	0	0
Conserved	ptc-miR530a	Potri.011G071900	Potri.004G062500	0	RING/FYVE/PHD-type zinc finger family protein
Specific	ptc-miR6425a	Potri.015G141800	Potri.012G139300	AHDP,ANL2	Homeobox-leucine zipper family protein / lipid-binding START domain-containing protein
Specific	ptc-miR6425a	Potri.002G053100	Potri.005G209400	0	0
Specific	ptc-miR6425b	Potri.015G141800	Potri.012G139300	AHDP,ANL2	Homeobox-leucine zipper family protein / lipid-binding START domain-containing protein
Specific	ptc-miR6425b	Potri.002G053100	Potri.005G209400	0	0
Specific	ptc-miR6425c	Potri.015G141800	Potri.012G139300	AHDP,ANL2	Homeobox-leucine zipper family protein / lipid-binding START domain-containing protein
Specific	ptc-miR6425c	Potri.002G053100	Potri.005G209400	0	0
Specific	ptc-miR6425d	Potri.015G141800	Potri.012G139300	AHDP,ANL2	Homeobox-leucine zipper family protein / lipid-binding START domain-containing protein
Specific	ptc-miR6425d	Potri.002G053100	Potri.005G209400	0	0
Specific	ptc-miR6425e	Potri.015G141800	Potri.012G139300	AHDP,ANL2	Homeobox-leucine zipper family protein / lipid-binding START domain-containing protein
Specific	ptc-miR6425e	Potri.002G053100	Potri.005G209400	0	0
Specific	ptc-miR6427	Potri.019G131600	Potri.013G159000	RPT2	Phototropic-responsive NPH3 family protein
Specific	ptc-miR6445a	Potri.010G201100	Potri.008G058300	APUM1,PUM1	pumilio 1
Specific	ptc-miR6445a	Potri.005G249400	Potri.002G011700	0	Protein of unknown function (DUF630 and DUF632)
Specific	ptc-miR6445a	Potri.002G099000	Potri.005G162900	0	phosphotyrosyl phosphatase activator (PTPA) family protein
Specific	ptc-miR6445a	Potri.018G143000	Potri.006G075900	0	0
Specific	ptc-miR6445b	Potri.010G201100	Potri.008G058300	APUM1,PUM1	pumilio 1
Specific	ptc-miR6445b	Potri.005G249400	Potri.002G011700	0	Protein of unknown function (DUF630 and DUF632)
Specific	ptc-miR6445b	Potri.002G099000	Potri.005G162900	0	phosphotyrosyl phosphatase activator (PTPA) family protein
Specific	ptc-miR6445b	Potri.018G143000	Potri.006G075900	0	0
Specific	ptc-miR6459a	Potri.001G034500	Potri.003G190300	0	Mitochondrial transcription termination factor family protein
Specific	ptc-miR6459a	Potri.005G234000	Potri.002G028700	RD19,RD19A	Papain family cysteine protease
Specific	ptc-miR6459b	Potri.010G212900	Potri.008G048100	0	0
Specific	ptc-miR6459b	Potri.008G048100	Potri.010G212900	0	0
Specific	ptc-miR7828	Potri.005G075400	Potri.007G093000	DOT3	Phototropic-responsive NPH3 family protein
Specific	ptc-miR7840	Potri.016G121400	Potri.006G102800	AMT2,AMT2;1,ATAMT2	ammonium transporter 2
Specific	ptc-miR7840	Potri.012G007800	Potri.015G028600;	AtRLP35,RLP35	receptor like protein 35
Specific	ptc-miR7840	Potri.006G210700	Potri.016G077800	0	P-loop containing nucleoside triphosphate hydrolases superfamily protein
Specific	ptc-miR7840	Potri.006G050200	Potri.016G056200	ATVLN2,VLN2	villin 2
Specific	ptc-miRN9	Potri.005G205200	Potri.002G057400	HPD,PDS1	phytoene desaturation 1
Specific	ptc-miRN10	Potri.002G144400	Potri.014G060400	0	0
Specific	ptc-miRN11	Potri.007G023600	Potri.005G121900	0	basic helix-loop-helix (bHLH) DNA-binding superfamily protein
Specific	ptc-miRN11	Potri.004G174700	Potri.009G134300	KAK,UPL3	HEAT repeat ;HECT-domain (ubiquitin-transferase)
Specific	ptc-miRN11	Potri.018G129600	Potri.006G067600	0	chloroplast thylakoid lumen protein
Specific	ptc-miRN18	Potri.003G089600	Potri.001G144600	0	pentatricopeptide (PPR) repeat-containing protein
Specific	ptc-miRN18	Potri.017G139800	Potri.004G080600	0	0
Specific	ptc-miRN18	Potri.004G080600	Potri.017G139800	0	0
Specific	ptc-miRN18	Potri.004G115500	Potri.017G099200	AGL4,SEP2	K-box region and MADS-box transcription factor family protein
Specific	ptc-miRN19	Potri.010G102600	Potri.008G138100	0	Protein of unknown function (DUF1423)
Specific	ptc-miRN19	Potri.008G138100	Potri.010G102600	0	Protein of unknown function (DUF1423)
Specific	ptc-miRN19	Potri.010G056200	Potri.008G178600	0	0
Specific	ptc-miRN21	Potri.007G023600	Potri.005G121900	0	basic helix-loop-helix (bHLH) DNA-binding superfamily protein
Specific	ptc-miRN21	Potri.004G174700	Potri.009G134300	KAK,UPL3	HEAT repeat ;HECT-domain (ubiquitin-transferase)
Specific	ptc-miRN21	Potri.018G129600	Potri.006G067600	0	chloroplast thylakoid lumen protein
Specific	ptc-miRN3	Potri.015G013400	Potri.012G014900	0	prolyl oligopeptidase family protein
Specific	ptc-miRN4	Potri.002G044800	Potri.005G218400	FBL17	RNI-like superfamily protein
Specific	ptc-miRN5	Potri.004G007400	Potri.011G007900	0	0
Specific	ptc-miRN5	Potri.014G090300	Potri.002G164400	AtWRKY22,WRKY22	WRKY family transcription factor
Specific	ptc-miRN5	Potri.007G041000	Potri.005G136300	0	Transducin/WD40 repeat-like superfamily protein
Specific	ptc-miRN5	Potri.005G208200	Potri.002G054500	0	F-box family protein
Specific	ptc-miRN5	Potri.010G196000	Potri.008G062000	ATROPGEF5,ROPGEF5	ROP guanine nucleotide exchange factor 5
Specific	ptc-miRN6	Potri.003G214200	Potri.001G012200	ATGSL12,gsl12	glucan synthase-like 12
Specific	ptc-miRN7	Potri.003G131600	Potri.001G100100	SP1L1	SPIRAL1-like1
Specific	ptc-miRN7	Potri.012G038400	Potri.015G030500	0	Cysteine/Histidine-rich C1 domain family protein
Specific	ptc-miR1446a	Potri.006G244900	Potri.018G035600	0	0
Specific	ptc-miR1446b	Potri.006G244900	Potri.018G035600	0	0
Specific	ptc-miR1446c	Potri.006G244900	Potri.018G035600	0	0
Specific	ptc-miR1446d	Potri.006G244900	Potri.018G035600	0	0
Specific	ptc-miR1446e	Potri.006G244900	Potri.018G035600	0	0
Specific	ptc-miR1447	Potri.013G076900	Potri.019G042700	0	0
Specific	ptc-miR1448	Potri.002G048000	Potri.005G215100	AtIDD12,IDD12	indeterminate(ID)-domain 12
Specific	ptc-miR1448	Potri.005G137700	Potri.007G043300	0	0
Conserved	ptc-miR156a	Potri.005G162500	Potri.002G099700	ATOST1,OST1,P44,SNRK2-6,SNRK2.6,SRK2E	Protein kinase superfamily protein
Conserved	ptc-miR156a	Potri.009G073300	Potri.001G278800	0	Clathrin, heavy chain
Conserved	ptc-miR156a	Potri.005G112900	Potri.007G057200	ATLFNR1,FNR1	ferredoxin-NADP(+)-oxidoreductase 1
Conserved	ptc-miR156a	Potri.003G115100	Potri.001G075000;Potri.001G117800	0	Leucine-rich repeat protein kinase family protein
Conserved	ptc-miR156a	Potri.010G058200	Potri.008G176900	0	Leucine-rich repeat protein kinase family protein
Conserved	ptc-miR156b	Potri.005G162500	Potri.002G099700	ATOST1,OST1,P44,SNRK2-6,SNRK2.6,SRK2E	Protein kinase superfamily protein
Conserved	ptc-miR156b	Potri.009G073300	Potri.001G278800	0	Clathrin, heavy chain
Conserved	ptc-miR156b	Potri.005G112900	Potri.007G057200	ATLFNR1,FNR1	ferredoxin-NADP(+)-oxidoreductase 1
Conserved	ptc-miR156b	Potri.003G115100	Potri.001G075000;Potri.001G117800	0	Leucine-rich repeat protein kinase family protein
Conserved	ptc-miR156b	Potri.010G058200	Potri.008G176900	0	Leucine-rich repeat protein kinase family protein
Conserved	ptc-miR156c	Potri.005G162500	Potri.002G099700	ATOST1,OST1,P44,SNRK2-6,SNRK2.6,SRK2E	Protein kinase superfamily protein
Conserved	ptc-miR156c	Potri.009G073300	Potri.001G278800	0	Clathrin, heavy chain
Conserved	ptc-miR156c	Potri.005G112900	Potri.007G057200	ATLFNR1,FNR1	ferredoxin-NADP(+)-oxidoreductase 1
Conserved	ptc-miR156c	Potri.003G115100	Potri.001G075000;Potri.001G117800	0	Leucine-rich repeat protein kinase family protein
Conserved	ptc-miR156c	Potri.010G058200	Potri.008G176900	0	Leucine-rich repeat protein kinase family protein
Conserved	ptc-miR156d	Potri.005G162500	Potri.002G099700	ATOST1,OST1,P44,SNRK2-6,SNRK2.6,SRK2E	Protein kinase superfamily protein
Conserved	ptc-miR156d	Potri.009G073300	Potri.001G278800	0	Clathrin, heavy chain
Conserved	ptc-miR156d	Potri.005G112900	Potri.007G057200	ATLFNR1,FNR1	ferredoxin-NADP(+)-oxidoreductase 1
Conserved	ptc-miR156d	Potri.003G115100	Potri.001G075000;Potri.001G117800	0	Leucine-rich repeat protein kinase family protein
Conserved	ptc-miR156d	Potri.010G058200	Potri.008G176900	0	Leucine-rich repeat protein kinase family protein
Conserved	ptc-miR156e	Potri.005G162500	Potri.002G099700	ATOST1,OST1,P44,SNRK2-6,SNRK2.6,SRK2E	Protein kinase superfamily protein
Conserved	ptc-miR156e	Potri.009G073300	Potri.001G278800	0	Clathrin, heavy chain
Conserved	ptc-miR156e	Potri.005G112900	Potri.007G057200	ATLFNR1,FNR1	ferredoxin-NADP(+)-oxidoreductase 1
Conserved	ptc-miR156e	Potri.003G115100	Potri.001G075000;Potri.001G117800	0	Leucine-rich repeat protein kinase family protein
Conserved	ptc-miR156e	Potri.010G058200	Potri.008G176900	0	Leucine-rich repeat protein kinase family protein
Conserved	ptc-miR156f	Potri.005G162500	Potri.002G099700	ATOST1,OST1,P44,SNRK2-6,SNRK2.6,SRK2E	Protein kinase superfamily protein
Conserved	ptc-miR156f	Potri.009G073300	Potri.001G278800	0	Clathrin, heavy chain
Conserved	ptc-miR156f	Potri.005G112900	Potri.007G057200	ATLFNR1,FNR1	ferredoxin-NADP(+)-oxidoreductase 1
Conserved	ptc-miR156f	Potri.003G115100	Potri.001G075000;Potri.001G117800	0	Leucine-rich repeat protein kinase family protein
Conserved	ptc-miR156f	Potri.010G058200	Potri.008G176900	0	Leucine-rich repeat protein kinase family protein
Conserved	ptc-miR156g	Potri.005G159100	Potri.002G102800	FIP1	FH interacting protein 1
Conserved	ptc-miR156g	Potri.005G010700	Potri.013G006500	0	Photosystem II reaction center PsbP family protein
Conserved	ptc-miR156g	Potri.014G022800	Potri.002G122700	EDA9	D-3-phosphoglycerate dehydrogenase
Conserved	ptc-miR156g	Potri.005G226900	Potri.002G036000	CKL6,PAPK1	casein kinase I-like 6
Conserved	ptc-miR156g	Potri.003G094000	Potri.001G140200	0	SNARE associated Golgi protein family
Conserved	ptc-miR156g	Potri.008G057300	Potri.010G202400	ATTBP2,TRFL9	TRF-like 9
Conserved	ptc-miR156h	Potri.005G159100	Potri.002G102800	FIP1	FH interacting protein 1
Conserved	ptc-miR156h	Potri.014G022800	Potri.002G122700	EDA9	D-3-phosphoglycerate dehydrogenase
Conserved	ptc-miR156h	Potri.008G057300	Potri.010G202400	ATTBP2,TRFL9	TRF-like 9
Conserved	ptc-miR156h	Potri.005G010700	Potri.013G006500	0	Photosystem II reaction center PsbP family protein
Conserved	ptc-miR156h	Potri.005G226900	Potri.002G036000	CKL6,PAPK1	casein kinase I-like 6
Conserved	ptc-miR156j	Potri.007G096800	Potri.005G072200	0	Protein of unknown function (DUF3550/UPF0682)
Conserved	ptc-miR156j	Potri.001G037700	Potri.003G187300	0	Galactose mutarotase-like superfamily protein
Conserved	ptc-miR156j	Potri.001G127100	Potri.003G106600	0	RING/U-box superfamily protein
Conserved	ptc-miR156j	Potri.005G226900	Potri.002G036000	CKL6,PAPK1	casein kinase I-like 6
Conserved	ptc-miR156j	Potri.010G115200	Potri.008G127700	0	Auxin efflux carrier family protein
Conserved	ptc-miR159a	Potri.007G132700	Potri.017G023300	0	Protein of unknown function (DUF3755)
Conserved	ptc-miR159a	Potri.002G140900	Potri.014G053500	DUO1	myb-like HTH transcriptional regulator family protein
Conserved	ptc-miR159a	Potri.008G071700	Potri.010G185700;	0	Homeodomain-like superfamily protein
Conserved	ptc-miR159a	Potri.011G149200	Potri.001G452800	0	RING/U-box superfamily protein
Conserved	ptc-miR159a	Potri.005G098600	Potri.007G065000	PIRL4	plant intracellular ras group-related LRR 4
Conserved	ptc-miR159a	Potri.014G095200	Potri.002G161600	0	Protein kinase family protein
Conserved	ptc-miR159a	Potri.017G025900	Potri.007G132000	SGR7,SHR	GRAS family transcription factor
Conserved	ptc-miR159a	Potri.004G167600	Potri.009G129100	0	0
Conserved	ptc-miR159a	Potri.002G049700	Potri.005G213200	0	Protein kinase superfamily protein
Conserved	ptc-miR159b	Potri.007G132700	Potri.017G023300	0	Protein of unknown function (DUF3755)
Conserved	ptc-miR159b	Potri.002G140900	Potri.014G053500	DUO1	myb-like HTH transcriptional regulator family protein
Conserved	ptc-miR159b	Potri.008G071700	Potri.010G185700;	0	Homeodomain-like superfamily protein
Conserved	ptc-miR159b	Potri.011G149200	Potri.001G452800	0	RING/U-box superfamily protein
Conserved	ptc-miR159b	Potri.005G098600	Potri.007G065000	PIRL4	plant intracellular ras group-related LRR 4
Conserved	ptc-miR159b	Potri.014G095200	Potri.002G161600	0	Protein kinase family protein
Conserved	ptc-miR159b	Potri.017G025900	Potri.007G132000	SGR7,SHR	GRAS family transcription factor
Conserved	ptc-miR159b	Potri.004G167600	Potri.009G129100	0	0
Conserved	ptc-miR159b	Potri.002G049700	Potri.005G213200	0	Protein kinase superfamily protein
Conserved	ptc-miR159c	Potri.013G099700	Potri.019G072300	SGR2	shoot gravitropism 2 (SGR2)
Conserved	ptc-miR159c	Potri.011G026600	Potri.004G021500	UBQ3	polyubiquitin 3
Conserved	ptc-miR159d	Potri.001G409000	Potri.T024300	0	0
Conserved	ptc-miR159d	Potri.T024300	Potri.001G409000	0	0
Conserved	ptc-miR162a	Potri.019G084400	Potri.013G113800	0	0
Conserved	ptc-miR162a	Potri.008G067000	Potri.010G190100	ATATE1,ATE1,DLS1	arginine-tRNA protein transferase 1
Conserved	ptc-miR162b	Potri.019G084400	Potri.013G113800	0	0
Conserved	ptc-miR162b	Potri.008G067000	Potri.010G190100	ATATE1,ATE1,DLS1	arginine-tRNA protein transferase 1
Conserved	ptc-miR164a	Potri.002G077200	Potri.005G183400	ATFMN/FHY,FMN/FHY	riboflavin kinase/FMN hydrolase
Conserved	ptc-miR164a	Potri.001G093600	Potri.003G138100	0	Transmembrane amino acid transporter family protein
Conserved	ptc-miR164a	Potri.012G094600	Potri.015G092100	0	Protein kinase superfamily protein
Conserved	ptc-miR164a	Potri.009G131700	Potri.004G172100	FIO1	methyltransferases
Conserved	ptc-miR164b	Potri.002G077200	Potri.005G183400	ATFMN/FHY,FMN/FHY	riboflavin kinase/FMN hydrolase
Conserved	ptc-miR164b	Potri.001G093600	Potri.003G138100	0	Transmembrane amino acid transporter family protein
Conserved	ptc-miR164b	Potri.012G094600	Potri.015G092100	0	Protein kinase superfamily protein
Conserved	ptc-miR164b	Potri.009G131700	Potri.004G172100	FIO1	methyltransferases
Conserved	ptc-miR164c	Potri.002G077200	Potri.005G183400	ATFMN/FHY,FMN/FHY	riboflavin kinase/FMN hydrolase
Conserved	ptc-miR164c	Potri.001G093600	Potri.003G138100	0	Transmembrane amino acid transporter family protein
Conserved	ptc-miR164c	Potri.012G094600	Potri.015G092100	0	Protein kinase superfamily protein
Conserved	ptc-miR164c	Potri.009G131700	Potri.004G172100	FIO1	methyltransferases
Conserved	ptc-miR164d	Potri.002G077200	Potri.005G183400	ATFMN/FHY,FMN/FHY	riboflavin kinase/FMN hydrolase
Conserved	ptc-miR164d	Potri.001G093600	Potri.003G138100	0	Transmembrane amino acid transporter family protein
Conserved	ptc-miR164d	Potri.012G094600	Potri.015G092100	0	Protein kinase superfamily protein
Conserved	ptc-miR164d	Potri.009G131700	Potri.004G172100	FIO1	methyltransferases
Conserved	ptc-miR166a	Potri.004G049300	Potri.011G058400	ANAC073,NAC073,SND2	NAC domain containing protein 73
Conserved	ptc-miR166a	Potri.011G098300	Potri.001G372300	ATHB-14,ATHB14,PHB,PHB-1D	Homeobox-leucine zipper family protein / lipid-binding START domain-containing protein
Conserved	ptc-miR166a	Potri.001G003900	Potri.003G221100	ATDEK1,DEK1,EMB1275,EMB80	calpain-type cysteine protease family
Conserved	ptc-miR166a	Potri.003G221100	Potri.001G003900	ATDEK1,DEK1,EMB1275,EMB80	calpain-type cysteine protease family
Conserved	ptc-miR166a	Potri.017G016700	Potri.007G135300	ANAC073,NAC073,SND2	NAC domain containing protein 73
Conserved	ptc-miR166a	Potri.003G076600	Potri.001G158200	OWL1	DNAJ heat shock N-terminal domain-containing protein
Conserved	ptc-miR166b	Potri.004G049300	Potri.011G058400	ANAC073,NAC073,SND2	NAC domain containing protein 73
Conserved	ptc-miR166b	Potri.011G098300	Potri.001G372300	ATHB-14,ATHB14,PHB,PHB-1D	Homeobox-leucine zipper family protein / lipid-binding START domain-containing protein
Conserved	ptc-miR166b	Potri.001G003900	Potri.003G221100	ATDEK1,DEK1,EMB1275,EMB80	calpain-type cysteine protease family
Conserved	ptc-miR166b	Potri.003G221100	Potri.001G003900	ATDEK1,DEK1,EMB1275,EMB80	calpain-type cysteine protease family
Conserved	ptc-miR166b	Potri.017G016700	Potri.007G135300	ANAC073,NAC073,SND2	NAC domain containing protein 73
Conserved	ptc-miR166b	Potri.003G076600	Potri.001G158200	OWL1	DNAJ heat shock N-terminal domain-containing protein
Conserved	ptc-miR166c	Potri.004G049300	Potri.011G058400	ANAC073,NAC073,SND2	NAC domain containing protein 73
Conserved	ptc-miR166c	Potri.011G098300	Potri.001G372300	ATHB-14,ATHB14,PHB,PHB-1D	Homeobox-leucine zipper family protein / lipid-binding START domain-containing protein
Conserved	ptc-miR166c	Potri.001G003900	Potri.003G221100	ATDEK1,DEK1,EMB1275,EMB80	calpain-type cysteine protease family
Conserved	ptc-miR166c	Potri.003G221100	Potri.001G003900	ATDEK1,DEK1,EMB1275,EMB80	calpain-type cysteine protease family
Conserved	ptc-miR166c	Potri.017G016700	Potri.007G135300	ANAC073,NAC073,SND2	NAC domain containing protein 73
Conserved	ptc-miR166c	Potri.003G076600	Potri.001G158200	OWL1	DNAJ heat shock N-terminal domain-containing protein
Conserved	ptc-miR166d	Potri.004G049300	Potri.011G058400	ANAC073,NAC073,SND2	NAC domain containing protein 73
Conserved	ptc-miR166d	Potri.011G098300	Potri.001G372300	ATHB-14,ATHB14,PHB,PHB-1D	Homeobox-leucine zipper family protein / lipid-binding START domain-containing protein
Conserved	ptc-miR166d	Potri.001G003900	Potri.003G221100	ATDEK1,DEK1,EMB1275,EMB80	calpain-type cysteine protease family
Conserved	ptc-miR166d	Potri.003G221100	Potri.001G003900	ATDEK1,DEK1,EMB1275,EMB80	calpain-type cysteine protease family
Conserved	ptc-miR166d	Potri.017G016700	Potri.007G135300	ANAC073,NAC073,SND2	NAC domain containing protein 73
Conserved	ptc-miR166d	Potri.003G076600	Potri.001G158200	OWL1	DNAJ heat shock N-terminal domain-containing protein
Conserved	ptc-miR166e	Potri.004G049300	Potri.011G058400	ANAC073,NAC073,SND2	NAC domain containing protein 73
Conserved	ptc-miR166e	Potri.011G098300	Potri.001G372300	ATHB-14,ATHB14,PHB,PHB-1D	Homeobox-leucine zipper family protein / lipid-binding START domain-containing protein
Conserved	ptc-miR166e	Potri.001G003900	Potri.003G221100	ATDEK1,DEK1,EMB1275,EMB80	calpain-type cysteine protease family
Conserved	ptc-miR166e	Potri.003G221100	Potri.001G003900	ATDEK1,DEK1,EMB1275,EMB80	calpain-type cysteine protease family
Conserved	ptc-miR166e	Potri.017G016700	Potri.007G135300	ANAC073,NAC073,SND2	NAC domain containing protein 73
Conserved	ptc-miR166e	Potri.003G076600	Potri.001G158200	OWL1	DNAJ heat shock N-terminal domain-containing protein
Conserved	ptc-miR166f	Potri.004G049300	Potri.011G058400	ANAC073,NAC073,SND2	NAC domain containing protein 73
Conserved	ptc-miR166f	Potri.011G098300	Potri.001G372300	ATHB-14,ATHB14,PHB,PHB-1D	Homeobox-leucine zipper family protein / lipid-binding START domain-containing protein
Conserved	ptc-miR166f	Potri.001G003900	Potri.003G221100	ATDEK1,DEK1,EMB1275,EMB80	calpain-type cysteine protease family
Conserved	ptc-miR166f	Potri.003G221100	Potri.001G003900	ATDEK1,DEK1,EMB1275,EMB80	calpain-type cysteine protease family
Conserved	ptc-miR166f	Potri.017G016700	Potri.007G135300	ANAC073,NAC073,SND2	NAC domain containing protein 73
Conserved	ptc-miR166f	Potri.003G076600	Potri.001G158200	OWL1	DNAJ heat shock N-terminal domain-containing protein
Conserved	ptc-miR166g	Potri.004G049300	Potri.011G058400	ANAC073,NAC073,SND2	NAC domain containing protein 73
Conserved	ptc-miR166g	Potri.011G098300	Potri.001G372300	ATHB-14,ATHB14,PHB,PHB-1D	Homeobox-leucine zipper family protein / lipid-binding START domain-containing protein
Conserved	ptc-miR166g	Potri.001G003900	Potri.003G221100	ATDEK1,DEK1,EMB1275,EMB80	calpain-type cysteine protease family
Conserved	ptc-miR166g	Potri.003G221100	Potri.001G003900	ATDEK1,DEK1,EMB1275,EMB80	calpain-type cysteine protease family
Conserved	ptc-miR166g	Potri.017G016700	Potri.007G135300	ANAC073,NAC073,SND2	NAC domain containing protein 73
Conserved	ptc-miR166g	Potri.003G076600	Potri.001G158200	OWL1	DNAJ heat shock N-terminal domain-containing protein
Conserved	ptc-miR166h	Potri.004G049300	Potri.011G058400	ANAC073,NAC073,SND2	NAC domain containing protein 73
Conserved	ptc-miR166h	Potri.011G098300	Potri.001G372300	ATHB-14,ATHB14,PHB,PHB-1D	Homeobox-leucine zipper family protein / lipid-binding START domain-containing protein
Conserved	ptc-miR166h	Potri.001G003900	Potri.003G221100	ATDEK1,DEK1,EMB1275,EMB80	calpain-type cysteine protease family
Conserved	ptc-miR166h	Potri.003G221100	Potri.001G003900	ATDEK1,DEK1,EMB1275,EMB80	calpain-type cysteine protease family
Conserved	ptc-miR166h	Potri.017G016700	Potri.007G135300	ANAC073,NAC073,SND2	NAC domain containing protein 73
Conserved	ptc-miR166h	Potri.003G076600	Potri.001G158200	OWL1	DNAJ heat shock N-terminal domain-containing protein
Conserved	ptc-miR166i	Potri.004G049300	Potri.011G058400	ANAC073,NAC073,SND2	NAC domain containing protein 73
Conserved	ptc-miR166i	Potri.011G098300	Potri.001G372300	ATHB-14,ATHB14,PHB,PHB-1D	Homeobox-leucine zipper family protein / lipid-binding START domain-containing protein
Conserved	ptc-miR166i	Potri.001G003900	Potri.003G221100	ATDEK1,DEK1,EMB1275,EMB80	calpain-type cysteine protease family
Conserved	ptc-miR166i	Potri.003G221100	Potri.001G003900	ATDEK1,DEK1,EMB1275,EMB80	calpain-type cysteine protease family
Conserved	ptc-miR166i	Potri.017G016700	Potri.007G135300	ANAC073,NAC073,SND2	NAC domain containing protein 73
Conserved	ptc-miR166i	Potri.003G076600	Potri.001G158200	OWL1	DNAJ heat shock N-terminal domain-containing protein
Conserved	ptc-miR166j	Potri.004G049300	Potri.011G058400	ANAC073,NAC073,SND2	NAC domain containing protein 73
Conserved	ptc-miR166j	Potri.011G098300	Potri.001G372300	ATHB-14,ATHB14,PHB,PHB-1D	Homeobox-leucine zipper family protein / lipid-binding START domain-containing protein
Conserved	ptc-miR166j	Potri.001G003900	Potri.003G221100	ATDEK1,DEK1,EMB1275,EMB80	calpain-type cysteine protease family
Conserved	ptc-miR166j	Potri.003G221100	Potri.001G003900	ATDEK1,DEK1,EMB1275,EMB80	calpain-type cysteine protease family
Conserved	ptc-miR166j	Potri.017G016700	Potri.007G135300	ANAC073,NAC073,SND2	NAC domain containing protein 73
Conserved	ptc-miR166j	Potri.003G076600	Potri.001G158200	OWL1	DNAJ heat shock N-terminal domain-containing protein
Conserved	ptc-miR166k	Potri.004G049300	Potri.011G058400	ANAC073,NAC073,SND2	NAC domain containing protein 73
Conserved	ptc-miR166k	Potri.011G098300	Potri.001G372300	ATHB-14,ATHB14,PHB,PHB-1D	Homeobox-leucine zipper family protein / lipid-binding START domain-containing protein
Conserved	ptc-miR166k	Potri.001G003900	Potri.003G221100	ATDEK1,DEK1,EMB1275,EMB80	calpain-type cysteine protease family
Conserved	ptc-miR166k	Potri.003G221100	Potri.001G003900	ATDEK1,DEK1,EMB1275,EMB80	calpain-type cysteine protease family
Conserved	ptc-miR166k	Potri.017G016700	Potri.007G135300	ANAC073,NAC073,SND2	NAC domain containing protein 73
Conserved	ptc-miR166k	Potri.003G076600	Potri.001G158200	OWL1	DNAJ heat shock N-terminal domain-containing protein
Conserved	ptc-miR166l	Potri.004G049300	Potri.011G058400	ANAC073,NAC073,SND2	NAC domain containing protein 73
Conserved	ptc-miR166l	Potri.011G098300	Potri.001G372300	ATHB-14,ATHB14,PHB,PHB-1D	Homeobox-leucine zipper family protein / lipid-binding START domain-containing protein
Conserved	ptc-miR166l	Potri.001G003900	Potri.003G221100	ATDEK1,DEK1,EMB1275,EMB80	calpain-type cysteine protease family
Conserved	ptc-miR166l	Potri.003G221100	Potri.001G003900	ATDEK1,DEK1,EMB1275,EMB80	calpain-type cysteine protease family
Conserved	ptc-miR166l	Potri.017G016700	Potri.007G135300	ANAC073,NAC073,SND2	NAC domain containing protein 73
Conserved	ptc-miR166l	Potri.003G076600	Potri.001G158200	OWL1	DNAJ heat shock N-terminal domain-containing protein
Conserved	ptc-miR166m	Potri.004G049300	Potri.011G058400	ANAC073,NAC073,SND2	NAC domain containing protein 73
Conserved	ptc-miR166m	Potri.011G098300	Potri.001G372300	ATHB-14,ATHB14,PHB,PHB-1D	Homeobox-leucine zipper family protein / lipid-binding START domain-containing protein
Conserved	ptc-miR166m	Potri.001G003900	Potri.003G221100	ATDEK1,DEK1,EMB1275,EMB80	calpain-type cysteine protease family
Conserved	ptc-miR166m	Potri.003G221100	Potri.001G003900	ATDEK1,DEK1,EMB1275,EMB80	calpain-type cysteine protease family
Conserved	ptc-miR166m	Potri.017G016700	Potri.007G135300	ANAC073,NAC073,SND2	NAC domain containing protein 73
Conserved	ptc-miR166m	Potri.003G076600	Potri.001G158200	OWL1	DNAJ heat shock N-terminal domain-containing protein
Conserved	ptc-miR166p	Potri.001G070100	Potri.003G160600	0	DHHC-type zinc finger family protein
Conserved	ptc-miR166p	Potri.001G117000	Potri.003G115700	0	0
Conserved	ptc-miR166p	Potri.003G115700	Potri.001G117000	0	0
Conserved	ptc-miR166p	Potri.001G372300	Potri.011G098300	ATHB-14,ATHB14,PHB,PHB-1D	Homeobox-leucine zipper family protein / lipid-binding START domain-containing protein
Conserved	ptc-miR166q	Potri.011G098300	Potri.001G372300	ATHB-14,ATHB14,PHB,PHB-1D	Homeobox-leucine zipper family protein / lipid-binding START domain-containing protein
Conserved	ptc-miR166q	Potri.004G049300	Potri.011G058400	ANAC073,NAC073,SND2	NAC domain containing protein 73
Conserved	ptc-miR166q	Potri.017G016700	Potri.007G135300	ANAC073,NAC073,SND2	NAC domain containing protein 73
Conserved	ptc-miR166q	Potri.001G003900	Potri.003G221100	ATDEK1,DEK1,EMB1275,EMB80	calpain-type cysteine protease family
Conserved	ptc-miR166q	Potri.003G221100	Potri.001G003900	ATDEK1,DEK1,EMB1275,EMB80	calpain-type cysteine protease family
Conserved	ptc-miR167a	Potri.002G235700	Potri.014G149200	0	Insulinase (Peptidase family M16) family protein
Conserved	ptc-miR167a	Potri.019G057700	Potri.013G091300	0	RING/U-box superfamily protein
Conserved	ptc-miR167b	Potri.002G235700	Potri.014G149200	0	Insulinase (Peptidase family M16) family protein
Conserved	ptc-miR167b	Potri.019G057700	Potri.013G091300	0	RING/U-box superfamily protein
Conserved	ptc-miR167c	Potri.002G235700	Potri.014G149200	0	Insulinase (Peptidase family M16) family protein
Conserved	ptc-miR167c	Potri.019G057700	Potri.013G091300	0	RING/U-box superfamily protein
Conserved	ptc-miR167d	Potri.002G235700	Potri.014G149200	0	Insulinase (Peptidase family M16) family protein
Conserved	ptc-miR167d	Potri.019G057700	Potri.013G091300	0	RING/U-box superfamily protein
Conserved	ptc-miR167f	Potri.002G235700	Potri.014G149200	0	Insulinase (Peptidase family M16) family protein
Conserved	ptc-miR167f	Potri.019G057700	Potri.013G091300	0	RING/U-box superfamily protein
Conserved	ptc-miR167g	Potri.002G235700	Potri.014G149200	0	Insulinase (Peptidase family M16) family protein
Conserved	ptc-miR167g	Potri.019G057700	Potri.013G091300	0	RING/U-box superfamily protein
Conserved	ptc-miR167h	Potri.004G228400	Potri.003G001400	ADL3,CF1,DL3,DRP2B	dynamin-like 3
Conserved	ptc-miR167h	Potri.002G235700	Potri.014G149200	0	Insulinase (Peptidase family M16) family protein
Conserved	ptc-miR167h	Potri.017G141000	Potri.004G078200	ARF8,ATARF8	auxin response factor 8
Conserved	ptc-miR171c	Potri.017G130200	Potri.004G086400	0	O-Glycosyl hydrolases family 17 protein
Conserved	ptc-miR171c	Potri.003G091800	Potri.001G142400	IKU1	VQ motif-containing protein
Conserved	ptc-miR171d	Potri.017G130200	Potri.004G086400	0	O-Glycosyl hydrolases family 17 protein
Conserved	ptc-miR171d	Potri.003G091800	Potri.001G142400	IKU1	VQ motif-containing protein
Conserved	ptc-miR171i	Potri.003G098100	Potri.001G135500	0	GHMP kinase family protein
Conserved	ptc-miR171l	Potri.001G390400	Potri.011G109500	ATMBF1B,MBF1B	multiprotein bridging factor 1B
Conserved	ptc-miR171l	Potri.005G166300	Potri.002G094800	0	tetratricopeptide repeat (TPR)-containing protein
Conserved	ptc-miR172a	Potri.005G224000	Potri.002G038600	RUS2,WXR1	Protein of unknown function, DUF647
Conserved	ptc-miR172a	Potri.018G019900	Potri.006G263500	CIPK5,SnRK3.24	CBL-interacting protein kinase 5
Conserved	ptc-miR172a	Potri.010G217700	Potri.008G043900	LBD1	LOB domain-containing protein 1
Conserved	ptc-miR172a	Potri.008G043900	Potri.010G217700	LBD1	LOB domain-containing protein 1
Conserved	ptc-miR172a	Potri.013G016800	Potri.005G025100	ATS6A.2,RPT5A	regulatory particle triple-A ATPase 5A
Conserved	ptc-miR172a	Potri.005G025100	Potri.013G016800	ATS6A.2,RPT5A	regulatory particle triple-A ATPase 5A
Conserved	ptc-miR172c	Potri.005G224000	Potri.002G038600	RUS2,WXR1	Protein of unknown function, DUF647
Conserved	ptc-miR172c	Potri.018G019900	Potri.006G263500	CIPK5,SnRK3.24	CBL-interacting protein kinase 5
Conserved	ptc-miR172c	Potri.010G217700	Potri.008G043900	LBD1	LOB domain-containing protein 1
Conserved	ptc-miR172c	Potri.008G043900	Potri.010G217700	LBD1	LOB domain-containing protein 1
Conserved	ptc-miR172c	Potri.013G016800	Potri.005G025100	ATS6A.2,RPT5A	regulatory particle triple-A ATPase 5A
Conserved	ptc-miR172c	Potri.005G025100	Potri.013G016800	ATS6A.2,RPT5A	regulatory particle triple-A ATPase 5A
Conserved	ptc-miR172f	Potri.005G224000	Potri.002G038600	RUS2,WXR1	Protein of unknown function, DUF647
Conserved	ptc-miR172f	Potri.018G019900	Potri.006G263500	CIPK5,SnRK3.24	CBL-interacting protein kinase 5
Conserved	ptc-miR172f	Potri.010G217700	Potri.008G043900	LBD1	LOB domain-containing protein 1
Conserved	ptc-miR172f	Potri.008G043900	Potri.010G217700	LBD1	LOB domain-containing protein 1
Conserved	ptc-miR172f	Potri.013G016800	Potri.005G025100	ATS6A.2,RPT5A	regulatory particle triple-A ATPase 5A
Conserved	ptc-miR172f	Potri.005G025100	Potri.013G016800	ATS6A.2,RPT5A	regulatory particle triple-A ATPase 5A
Conserved	ptc-miR319a	Potri.007G137700	Potri.017G014300	0	Reticulon family protein
Conserved	ptc-miR319a	Potri.019G091300	Potri.013G119400	MEE35,TCP4	TCP family transcription factor 4
Conserved	ptc-miR319a	Potri.013G119400	Potri.019G091300	MEE35,TCP4	TCP family transcription factor 4
Conserved	ptc-miR319a	Potri.011G096600	Potri.001G375800	MEE35,TCP4	TCP family transcription factor 4
Conserved	ptc-miR319a	Potri.001G375800	Potri.011G096600	MEE35,TCP4	TCP family transcription factor 4
Conserved	ptc-miR319b	Potri.007G137700	Potri.017G014300	0	Reticulon family protein
Conserved	ptc-miR319b	Potri.019G091300	Potri.013G119400	MEE35,TCP4	TCP family transcription factor 4
Conserved	ptc-miR319b	Potri.013G119400	Potri.019G091300	MEE35,TCP4	TCP family transcription factor 4
Conserved	ptc-miR319b	Potri.011G096600	Potri.001G375800	MEE35,TCP4	TCP family transcription factor 4
Conserved	ptc-miR319b	Potri.001G375800	Potri.011G096600	MEE35,TCP4	TCP family transcription factor 4
Conserved	ptc-miR319e	Potri.007G137700	Potri.017G014300	0	Reticulon family protein
Conserved	ptc-miR319e	Potri.013G119400	Potri.019G091300	MEE35,TCP4	TCP family transcription factor 4
Conserved	ptc-miR319e	Potri.011G096600	Potri.001G375800	MEE35,TCP4	TCP family transcription factor 4
Conserved	ptc-miR319e	Potri.019G091300	Potri.013G119400	MEE35,TCP4	TCP family transcription factor 4
Conserved	ptc-miR319e	Potri.001G375800	Potri.011G096600	MEE35,TCP4	TCP family transcription factor 4
Conserved	ptc-miR319f	Potri.007G137700	Potri.017G014300	0	Reticulon family protein
Conserved	ptc-miR319f	Potri.019G091300	Potri.013G119400	MEE35,TCP4	TCP family transcription factor 4
Conserved	ptc-miR319f	Potri.013G119400	Potri.019G091300	MEE35,TCP4	TCP family transcription factor 4
Conserved	ptc-miR319f	Potri.011G096600	Potri.001G375800	MEE35,TCP4	TCP family transcription factor 4
Conserved	ptc-miR319f	Potri.001G375800	Potri.011G096600	MEE35,TCP4	TCP family transcription factor 4
Conserved	ptc-miR319g	Potri.007G137700	Potri.017G014300	0	Reticulon family protein
Conserved	ptc-miR319g	Potri.019G091300	Potri.013G119400	MEE35,TCP4	TCP family transcription factor 4
Conserved	ptc-miR319g	Potri.013G119400	Potri.019G091300	MEE35,TCP4	TCP family transcription factor 4
Conserved	ptc-miR319g	Potri.011G096600	Potri.001G375800	MEE35,TCP4	TCP family transcription factor 4
Conserved	ptc-miR319g	Potri.001G375800	Potri.011G096600	MEE35,TCP4	TCP family transcription factor 4
Conserved	ptc-miR319h	Potri.007G137700	Potri.017G014300	0	Reticulon family protein
Conserved	ptc-miR319h	Potri.013G119400	Potri.019G091300	MEE35,TCP4	TCP family transcription factor 4
Conserved	ptc-miR319h	Potri.011G096600	Potri.001G375800	MEE35,TCP4	TCP family transcription factor 4
Conserved	ptc-miR319h	Potri.019G091300	Potri.013G119400	MEE35,TCP4	TCP family transcription factor 4
Conserved	ptc-miR319h	Potri.001G375800	Potri.011G096600	MEE35,TCP4	TCP family transcription factor 4
Conserved	ptc-miR319i	Potri.001G036000	Potri.003G189700	ATMYB65,MYB65	myb domain protein 65
Conserved	ptc-miR319i	Potri.002G140900	Potri.014G053500	DUO1	myb-like HTH transcriptional regulator family protein
Conserved	ptc-miR319i	Potri.009G018700	Potri.001G224500	ATMYB33,MYB33	myb domain protein 33
Conserved	ptc-miR319i	Potri.007G132700	Potri.017G023300	0	Protein of unknown function (DUF3755)
Conserved	ptc-miR319i	Potri.017G025900	Potri.007G132000	SGR7,SHR	GRAS family transcription factor
Conserved	ptc-miR3627a	Potri.001G258700	Potri.009G053900	ATMYB46,MYB46	myb domain protein 46
Conserved	ptc-miR3627a	Potri.015G092800	Potri.012G095300	ADK1	adenylate kinase 1
Conserved	ptc-miR3627a	Potri.012G032200	Potri.015G022900	PDV1	plastid division1
Conserved	ptc-miR3627a	Potri.003G194600	Potri.001G029800	BZIP45,TGA6	TGACG motif-binding factor 6
Conserved	ptc-miR3627a	Potri.004G167500	Potri.009G129000	0	Plant neutral invertase family protein
Conserved	ptc-miR3627a	Potri.019G081600	Potri.013G109400	0	P-loop containing nucleoside triphosphate hydrolases superfamily protein
Conserved	ptc-miR390a	Potri.011G116900	Potri.001G398500	AtPSKR2,PSKR2	phytosylfokine-alpha receptor 2
Conserved	ptc-miR390a	Potri.009G144500	Potri.004G184500	AIR3	Subtilisin-like serine endopeptidase family protein
Conserved	ptc-miR390a	Potri.006G061300	Potri.018G116800	AtRLP21,RLP21	receptor like protein 21
Conserved	ptc-miR390a	Potri.010G254700	Potri.008G002900	SHM1,SHMT1,STM	serine transhydroxymethyltransferase 1
Conserved	ptc-miR390a	Potri.008G002900	Potri.010G254700	SHM1,SHMT1,STM	serine transhydroxymethyltransferase 1
Conserved	ptc-miR390a	Potri.002G129300	Potri.014G035700	ADR1-L1	ADR1-like 1
Conserved	ptc-miR390b	Potri.011G116900	Potri.001G398500	AtPSKR2,PSKR2	phytosylfokine-alpha receptor 2
Conserved	ptc-miR390b	Potri.009G144500	Potri.004G184500	AIR3	Subtilisin-like serine endopeptidase family protein
Conserved	ptc-miR390b	Potri.006G061300	Potri.018G116800	AtRLP21,RLP21	receptor like protein 21
Conserved	ptc-miR390b	Potri.010G254700	Potri.008G002900	SHM1,SHMT1,STM	serine transhydroxymethyltransferase 1
Conserved	ptc-miR390b	Potri.008G002900	Potri.010G254700	SHM1,SHMT1,STM	serine transhydroxymethyltransferase 1
Conserved	ptc-miR390b	Potri.002G129300	Potri.014G035700	ADR1-L1	ADR1-like 1
Conserved	ptc-miR390c	Potri.011G116900	Potri.001G398500	AtPSKR2,PSKR2	phytosylfokine-alpha receptor 2
Conserved	ptc-miR390c	Potri.009G144500	Potri.004G184500	AIR3	Subtilisin-like serine endopeptidase family protein
Conserved	ptc-miR390c	Potri.006G061300	Potri.018G116800	AtRLP21,RLP21	receptor like protein 21
Conserved	ptc-miR390c	Potri.010G254700	Potri.008G002900	SHM1,SHMT1,STM	serine transhydroxymethyltransferase 1
Conserved	ptc-miR390c	Potri.008G002900	Potri.010G254700	SHM1,SHMT1,STM	serine transhydroxymethyltransferase 1
Conserved	ptc-miR390c	Potri.002G129300	Potri.014G035700	ADR1-L1	ADR1-like 1
Conserved	ptc-miR390d	Potri.011G116900	Potri.001G398500	AtPSKR2,PSKR2	phytosylfokine-alpha receptor 2
Conserved	ptc-miR390d	Potri.009G144500	Potri.004G184500	AIR3	Subtilisin-like serine endopeptidase family protein
Conserved	ptc-miR390d	Potri.006G061300	Potri.018G116800	AtRLP21,RLP21	receptor like protein 21
Conserved	ptc-miR390d	Potri.010G254700	Potri.008G002900	SHM1,SHMT1,STM	serine transhydroxymethyltransferase 1
Conserved	ptc-miR390d	Potri.008G002900	Potri.010G254700	SHM1,SHMT1,STM	serine transhydroxymethyltransferase 1
Conserved	ptc-miR390d	Potri.002G129300	Potri.014G035700	ADR1-L1	ADR1-like 1
Conserved	ptc-miR393a	Potri.005G181300	Potri.002G080100;Potri.T152000	EMB1968,RFC4	ATPase family associated with various cellular activities (AAA)
Conserved	ptc-miR393a	Potri.004G089100	Potri.017G126500	0	Protein kinase superfamily protein
Conserved	ptc-miR393a	Potri.014G015000	Potri.002G117600	0	0
Conserved	ptc-miR393a	Potri.003G124600	Potri.001G106700	0	Myosin heavy chain-related protein
Conserved	ptc-miR393b	Potri.005G181300	Potri.002G080100;Potri.T152000	EMB1968,RFC4	ATPase family associated with various cellular activities (AAA)
Conserved	ptc-miR393b	Potri.004G089100	Potri.017G126500	0	Protein kinase superfamily protein
Conserved	ptc-miR393b	Potri.014G015000	Potri.002G117600	0	0
Conserved	ptc-miR393b	Potri.003G124600	Potri.001G106700	0	Myosin heavy chain-related protein
Conserved	ptc-miR393c	Potri.005G181300	Potri.002G080100;Potri.T152000	EMB1968,RFC4	ATPase family associated with various cellular activities (AAA)
Conserved	ptc-miR393c	Potri.004G089100	Potri.017G126500	0	Protein kinase superfamily protein
Conserved	ptc-miR393c	Potri.014G015000	Potri.002G117600	0	0
Conserved	ptc-miR394a	Potri.009G168500	Potri.004G207000;Potri.004G207100	TMT2	tonoplast monosaccharide transporter2
Conserved	ptc-miR394a	Potri.005G122500	Potri.007G024100	AtHB24,HB24	homeobox protein 24
Conserved	ptc-miR394a	Potri.001G330400	Potri.T061800	0	0
Conserved	ptc-miR394a	Potri.015G094300	Potri.012G096500	0	Protein of unknown function (DUF167)
Conserved	ptc-miR394a	Potri.006G061700	Potri.018G118400	0	Leucine-rich repeat family protein
Conserved	ptc-miR394a	Potri.003G050100	Potri.001G188800	ATHB-15,ATHB15,CNA,ICU4	Homeobox-leucine zipper family protein / lipid-binding START domain-containing protein
Conserved	ptc-miR394a	Potri.009G045400	Potri.001G250800	0	RING/U-box superfamily protein
Conserved	ptc-miR394a	Potri.005G083300	Potri.007G082400	ATSERK1,SERK1	somatic embryogenesis receptor-like kinase 1
Conserved	ptc-miR394a	Potri.006G058200	Potri.016G049900	CYP93D1	cytochrome P450, family 93, subfamily D, polypeptide 1
Conserved	ptc-miR394a	Potri.019G002500	Potri.001G307300	0	disease resistance protein (TIR-NBS-LRR class), putative
Conserved	ptc-miR394b	Potri.009G168500	Potri.004G207000;Potri.004G207100	TMT2	tonoplast monosaccharide transporter2
Conserved	ptc-miR394b	Potri.005G122500	Potri.007G024100	AtHB24,HB24	homeobox protein 24
Conserved	ptc-miR394b	Potri.001G330400	Potri.T061800	0	0
Conserved	ptc-miR394b	Potri.015G094300	Potri.012G096500	0	Protein of unknown function (DUF167)
Conserved	ptc-miR394b	Potri.006G061700	Potri.018G118400	0	Leucine-rich repeat family protein
Conserved	ptc-miR394b	Potri.003G050100	Potri.001G188800	ATHB-15,ATHB15,CNA,ICU4	Homeobox-leucine zipper family protein / lipid-binding START domain-containing protein
Conserved	ptc-miR394b	Potri.009G045400	Potri.001G250800	0	RING/U-box superfamily protein
Conserved	ptc-miR394b	Potri.005G083300	Potri.007G082400	ATSERK1,SERK1	somatic embryogenesis receptor-like kinase 1
Conserved	ptc-miR394b	Potri.006G058200	Potri.016G049900	CYP93D1	cytochrome P450, family 93, subfamily D, polypeptide 1
Conserved	ptc-miR394b	Potri.019G002500	Potri.001G307300	0	disease resistance protein (TIR-NBS-LRR class), putative
Conserved	ptc-miR395a	Potri.006G056800	Potri.016G051500	0	0
Conserved	ptc-miR395a	Potri.007G023900	Potri.005G122300	0	AAA-type ATPase family protein
Conserved	ptc-miR395a	Potri.006G164000	Potri.018G086300	CDC27b,HBT	CDC27 family protein
Conserved	ptc-miR395a	Potri.017G146800	Potri.004G073300	0	Homeodomain-like superfamily protein
Conserved	ptc-miR395a	Potri.018G033300	Potri.006G248100	LUG,RON2	LisH dimerisation motif;WD40/YVTN repeat-like-containing domain
Conserved	ptc-miR395a	Potri.005G166300	Potri.002G094800	0	tetratricopeptide repeat (TPR)-containing protein
Conserved	ptc-miR395a	Potri.014G117800	Potri.002G192300	ATDUF6,DUF6	DOMAIN OF UNKNOWN FUNCTION 724 6
Conserved	ptc-miR395a	Potri.016G051500	Potri.006G056800	0	nucleolar protein gar2-related
Conserved	ptc-miR395a	Potri.006G248100	Potri.018G033300	LUG,RON2	LisH dimerisation motif;WD40/YVTN repeat-like-containing domain
Conserved	ptc-miR395a	Potri.001G092300	Potri.003G139400	0	0
Conserved	ptc-miR395a	Potri.005G189300	Potri.002G070600	0	VQ motif-containing protein
Conserved	ptc-miR395a	Potri.004G150800	Potri.009G112400	0	Protein of unknown function (DUF677)
Conserved	ptc-miR395a	Potri.009G112400	Potri.004G150800	0	Protein of unknown function (DUF677)
Conserved	ptc-miR395a	Potri.018G111300	Potri.006G188000	ARR12,RR12	response regulator 12
Conserved	ptc-miR395a	Potri.007G135500	Potri.017G016200	0	Homeodomain-like transcriptional regulator
Conserved	ptc-miR395a	Potri.017G016200	Potri.007G135500	0	Homeodomain-like transcriptional regulator
Conserved	ptc-miR395b	Potri.008G159000	Potri.010G081200	APS1	ATP sulfurylase 1
Conserved	ptc-miR395b	Potri.010G230300	Potri.008G031200	0	Galactose oxidase/kelch repeat superfamily protein
Conserved	ptc-miR395b	Potri.002G054400	Potri.005G208300	TBL11	TRICHOME BIREFRINGENCE-LIKE 11
Conserved	ptc-miR395b	Potri.006G057200	Potri.016G051000	0	basic helix-loop-helix (bHLH) DNA-binding superfamily protein
Conserved	ptc-miR395b	Potri.005G213500	Potri.002G049500	AST12,SULTR3;1	sulfate transporter 3;1
Conserved	ptc-miR395e	Potri.008G159000	Potri.010G081200	APS1	ATP sulfurylase 1
Conserved	ptc-miR395e	Potri.010G230300	Potri.008G031200	0	Galactose oxidase/kelch repeat superfamily protein
Conserved	ptc-miR395e	Potri.002G054400	Potri.005G208300	TBL11	TRICHOME BIREFRINGENCE-LIKE 11
Conserved	ptc-miR395e	Potri.006G057200	Potri.016G051000	0	basic helix-loop-helix (bHLH) DNA-binding superfamily protein
Conserved	ptc-miR395e	Potri.005G213500	Potri.002G049500	AST12,SULTR3;1	sulfate transporter 3;1
Conserved	ptc-miR395f	Potri.008G159000	Potri.010G081200	APS1	ATP sulfurylase 1
Conserved	ptc-miR395f	Potri.010G230300	Potri.008G031200	0	Galactose oxidase/kelch repeat superfamily protein
Conserved	ptc-miR395f	Potri.002G054400	Potri.005G208300	TBL11	TRICHOME BIREFRINGENCE-LIKE 11
Conserved	ptc-miR395f	Potri.006G057200	Potri.016G051000	0	basic helix-loop-helix (bHLH) DNA-binding superfamily protein
Conserved	ptc-miR395f	Potri.005G213500	Potri.002G049500	AST12,SULTR3;1	sulfate transporter 3;1
Conserved	ptc-miR395k	Potri.008G159000	Potri.010G081200	APS1	ATP sulfurylase 1
Conserved	ptc-miR395k	Potri.010G230300	Potri.008G031200	0	Galactose oxidase/kelch repeat superfamily protein
Conserved	ptc-miR395k	Potri.002G054400	Potri.005G208300	TBL11	TRICHOME BIREFRINGENCE-LIKE 11
Conserved	ptc-miR395k	Potri.006G057200	Potri.016G051000	0	basic helix-loop-helix (bHLH) DNA-binding superfamily protein
Conserved	ptc-miR395k	Potri.005G213500	Potri.002G049500	AST12,SULTR3;1	sulfate transporter 3;1
Conserved	ptc-miR396a	Potri.006G066800	Potri.018G128000	TPR4,WSIP2	WUS-interacting protein 2
Conserved	ptc-miR396a	Potri.003G065000	Potri.001G169100	AtGRF5,GRF5	growth-regulating factor 5
Conserved	ptc-miR396a	Potri.002G115100	Potri.014G012800	AtGRF1,GRF1	growth-regulating factor 1
Conserved	ptc-miR396a	Potri.015G006200	Potri.012G022600	AtGRF7,GRF7	growth-regulating factor 7
Conserved	ptc-miR396a	Potri.001G132600	Potri.003G100800	AtGRF2,GRF2	growth-regulating factor 2
Conserved	ptc-miR396a	Potri.001G082700	Potri.003G118100	AtGRF8,GRF8	growth-regulating factor 8
Conserved	ptc-miR396a	Potri.012G022600	Potri.015G006200	AtGRF7,GRF7	growth-regulating factor 7
Conserved	ptc-miR396a	Potri.014G012800	Potri.002G115100	AtGRF1,GRF1	growth-regulating factor 1
Conserved	ptc-miR396a	Potri.001G116300	Potri.003G116100	0	Tetratricopeptide repeat (TPR)-like superfamily protein
Conserved	ptc-miR396a	Potri.010G131600	Potri.008G114500	0	Protein of unknown function, DUF617
Conserved	ptc-miR396a	Potri.015G117400	Potri.012G118700	AGO2	Argonaute family protein
Conserved	ptc-miR396a	Potri.010G081600	Potri.008G158400	0	Aluminium induced protein with YGL and LRDR motifs
Conserved	ptc-miR396a	Potri.015G092000	Potri.012G094500	MLS	malate synthase
Conserved	ptc-miR396a	Potri.001G020600	Potri.003G204000	ACA4	autoinhibited Ca(2+)-ATPase, isoform 4
Conserved	ptc-miR396a	Potri.018G118100	Potri.006G061500	0	ubiquitin-associated (UBA)/TS-N domain-containing protein
Conserved	ptc-miR396a	Potri.006G061500	Potri.018G118100	0	ubiquitin-associated (UBA)/TS-N domain-containing protein
Conserved	ptc-miR396b	Potri.006G066800	Potri.018G128000	TPR4,WSIP2	WUS-interacting protein 2
Conserved	ptc-miR396b	Potri.003G065000	Potri.001G169100	AtGRF5,GRF5	growth-regulating factor 5
Conserved	ptc-miR396b	Potri.002G115100	Potri.014G012800	AtGRF1,GRF1	growth-regulating factor 1
Conserved	ptc-miR396b	Potri.015G006200	Potri.012G022600	AtGRF7,GRF7	growth-regulating factor 7
Conserved	ptc-miR396b	Potri.001G132600	Potri.003G100800	AtGRF2,GRF2	growth-regulating factor 2
Conserved	ptc-miR396b	Potri.001G082700	Potri.003G118100	AtGRF8,GRF8	growth-regulating factor 8
Conserved	ptc-miR396b	Potri.012G022600	Potri.015G006200	AtGRF7,GRF7	growth-regulating factor 7
Conserved	ptc-miR396b	Potri.014G012800	Potri.002G115100	AtGRF1,GRF1	growth-regulating factor 1
Conserved	ptc-miR396b	Potri.001G116300	Potri.003G116100	0	Tetratricopeptide repeat (TPR)-like superfamily protein
Conserved	ptc-miR396b	Potri.010G131600	Potri.008G114500	0	Protein of unknown function, DUF617
Conserved	ptc-miR396b	Potri.015G117400	Potri.012G118700	AGO2	Argonaute family protein
Conserved	ptc-miR396b	Potri.010G081600	Potri.008G158400	0	Aluminium induced protein with YGL and LRDR motifs
Conserved	ptc-miR396b	Potri.015G092000	Potri.012G094500	MLS	malate synthase
Conserved	ptc-miR396b	Potri.001G020600	Potri.003G204000	ACA4	autoinhibited Ca(2+)-ATPase, isoform 4
Conserved	ptc-miR396b	Potri.018G118100	Potri.006G061500	0	ubiquitin-associated (UBA)/TS-N domain-containing protein
Conserved	ptc-miR396b	Potri.006G061500	Potri.018G118100	0	ubiquitin-associated (UBA)/TS-N domain-containing protein
Conserved	ptc-miR396c	Potri.006G066800	Potri.018G128000	TPR4,WSIP2	WUS-interacting protein 2
Conserved	ptc-miR396c	Potri.010G131600	Potri.008G114500	0	Protein of unknown function, DUF617
Conserved	ptc-miR396c	Potri.001G116300	Potri.003G116100	0	Tetratricopeptide repeat (TPR)-like superfamily protein
Conserved	ptc-miR396c	Potri.003G065000	Potri.001G169100	AtGRF5,GRF5	growth-regulating factor 5
Conserved	ptc-miR396c	Potri.002G115100	Potri.014G012800	AtGRF1,GRF1	growth-regulating factor 1
Conserved	ptc-miR396c	Potri.015G006200	Potri.012G022600	AtGRF7,GRF7	growth-regulating factor 7
Conserved	ptc-miR396c	Potri.001G132600	Potri.003G100800	AtGRF2,GRF2	growth-regulating factor 2
Conserved	ptc-miR396c	Potri.001G082700	Potri.003G118100	AtGRF8,GRF8	growth-regulating factor 8
Conserved	ptc-miR396c	Potri.012G022600	Potri.015G006200	AtGRF7,GRF7	growth-regulating factor 7
Conserved	ptc-miR396c	Potri.014G012800	Potri.002G115100	AtGRF1,GRF1	growth-regulating factor 1
Conserved	ptc-miR396c	Potri.015G117400	Potri.012G118700	AGO2	Argonaute family protein
Conserved	ptc-miR396c	Potri.010G081600	Potri.008G158400	0	Aluminium induced protein with YGL and LRDR motifs
Conserved	ptc-miR396c	Potri.015G092000	Potri.012G094500	MLS	malate synthase
Conserved	ptc-miR396c	Potri.001G020600	Potri.003G204000	ACA4	autoinhibited Ca(2+)-ATPase, isoform 4
Conserved	ptc-miR396c	Potri.018G118100	Potri.006G061500	0	ubiquitin-associated (UBA)/TS-N domain-containing protein
Conserved	ptc-miR396c	Potri.006G061500	Potri.018G118100	0	ubiquitin-associated (UBA)/TS-N domain-containing protein
Conserved	ptc-miR396e	Potri.006G066800	Potri.018G128000	TPR4,WSIP2	WUS-interacting protein 2
Conserved	ptc-miR396e	Potri.003G065000	Potri.001G169100	AtGRF5,GRF5	growth-regulating factor 5
Conserved	ptc-miR396e	Potri.002G115100	Potri.014G012800	AtGRF1,GRF1	growth-regulating factor 1
Conserved	ptc-miR396e	Potri.015G006200	Potri.012G022600	AtGRF7,GRF7	growth-regulating factor 7
Conserved	ptc-miR396e	Potri.001G132600	Potri.003G100800	AtGRF2,GRF2	growth-regulating factor 2
Conserved	ptc-miR396e	Potri.001G082700	Potri.003G118100	AtGRF8,GRF8	growth-regulating factor 8
Conserved	ptc-miR396e	Potri.012G022600	Potri.015G006200	AtGRF7,GRF7	growth-regulating factor 7
Conserved	ptc-miR396e	Potri.014G012800	Potri.002G115100	AtGRF1,GRF1	growth-regulating factor 1
Conserved	ptc-miR396e	Potri.001G116300	Potri.003G116100	0	Tetratricopeptide repeat (TPR)-like superfamily protein
Conserved	ptc-miR396e	Potri.010G131600	Potri.008G114500	0	Protein of unknown function, DUF617
Conserved	ptc-miR396e	Potri.015G117400	Potri.012G118700	AGO2	Argonaute family protein
Conserved	ptc-miR396e	Potri.010G081600	Potri.008G158400	0	Aluminium induced protein with YGL and LRDR motifs
Conserved	ptc-miR396e	Potri.015G092000	Potri.012G094500	MLS	malate synthase
Conserved	ptc-miR396e	Potri.001G020600	Potri.003G204000	ACA4	autoinhibited Ca(2+)-ATPase, isoform 4
Conserved	ptc-miR396e	Potri.018G118100	Potri.006G061500	0	ubiquitin-associated (UBA)/TS-N domain-containing protein
Conserved	ptc-miR396e	Potri.006G061500	Potri.018G118100	0	ubiquitin-associated (UBA)/TS-N domain-containing protein
Conserved	ptc-miR396f	Potri.012G094500	Potri.015G092000	MLS	malate synthase
Conserved	ptc-miR396f	Potri.010G081600	Potri.008G158400	0	Aluminium induced protein with YGL and LRDR motifs
Conserved	ptc-miR396f	Potri.001G256400	Potri.009G052000	0	NAD(P)-binding Rossmann-fold superfamily protein
Conserved	ptc-miR396f	Potri.012G087000	Potri.015G083300	CRK42	cysteine-rich RLK (RECEPTOR-like protein kinase) 42
Conserved	ptc-miR396f	Potri.006G111900	Potri.016G141300	0	0
Conserved	ptc-miR396f	Potri.012G002100	Potri.015G019200	0	Protein phosphatase 2C family protein
Conserved	ptc-miR396f	Potri.015G117400	Potri.012G118700	AGO2	Argonaute family protein
Conserved	ptc-miR396f	Potri.001G466800	Potri.011G164400	0	myosin heavy chain-related
Conserved	ptc-miR396f	Potri.011G164400	Potri.001G466800	0	myosin heavy chain-related
Conserved	ptc-miR396f	Potri.014G161200	Potri.002G219000	0	Calcium-binding EF-hand family protein
Conserved	ptc-miR396g	Potri.012G094500	Potri.015G092000	MLS	malate synthase
Conserved	ptc-miR396g	Potri.010G081600	Potri.008G158400	0	Aluminium induced protein with YGL and LRDR motifs
Conserved	ptc-miR396g	Potri.001G256400	Potri.009G052000	0	NAD(P)-binding Rossmann-fold superfamily protein
Conserved	ptc-miR396g	Potri.012G087000	Potri.015G083300	CRK42	cysteine-rich RLK (RECEPTOR-like protein kinase) 42
Conserved	ptc-miR396g	Potri.006G111900	Potri.016G141300	0	0
Conserved	ptc-miR396g	Potri.012G002100	Potri.015G019200	0	Protein phosphatase 2C family protein
Conserved	ptc-miR396g	Potri.015G117400	Potri.012G118700	AGO2	Argonaute family protein
Conserved	ptc-miR396g	Potri.001G466800	Potri.011G164400	0	myosin heavy chain-related
Conserved	ptc-miR396g	Potri.011G164400	Potri.001G466800	0	myosin heavy chain-related
Conserved	ptc-miR396g	Potri.014G161200	Potri.002G219000	0	Calcium-binding EF-hand family protein
Conserved	ptc-miR398a	Potri.014G012700	Potri.002G115000	ATRBP1,RBP1	RNA-binding protein 1
Conserved	ptc-miR398a	Potri.011G096600	Potri.001G375800	MEE35,TCP4	TCP family transcription factor 4
Conserved	ptc-miR398a	Potri.001G375800	Potri.011G096600	MEE35,TCP4	TCP family transcription factor 4
Conserved	ptc-miR398b	Potri.001G321600	Potri.017G060000	SBP1	selenium-binding protein 1
Conserved	ptc-miR398b	Potri.015G009400	Potri.012G018600	0	Regulator of chromosome condensation (RCC1) family protein
Conserved	ptc-miR398c	Potri.001G321600	Potri.017G060000	SBP1	selenium-binding protein 1
Conserved	ptc-miR398c	Potri.015G009400	Potri.012G018600	0	Regulator of chromosome condensation (RCC1) family protein
Conserved	ptc-miR399f	Potri.003G194900	Potri.001G029500	atnudt16,NUDT16	nudix hydrolase homolog 16
Conserved	ptc-miR399g	Potri.003G194900	Potri.001G029500	atnudt16,NUDT16	nudix hydrolase homolog 16
Conserved	ptc-miR399h	Potri.005G246000	Potri.002G016100	ATPLDDELTA,PLDDELTA	phospholipase D delta
Conserved	ptc-miR399h	Potri.007G060300	Potri.005G104700	ATPLDDELTA,PLDDELTA	phospholipase D delta
Conserved	ptc-miR399h	Potri.003G033300	Potri.001G193400	0	0
Conserved	ptc-miR399h	Potri.019G048900	Potri.013G083200	HEME2	Uroporphyrinogen decarboxylase
Conserved	ptc-miR399i	Potri.005G223500	Potri.002G038900	ATPT2,PHT1;4	phosphate transporter 1;4
Conserved	ptc-miR399i	Potri.002G038900	Potri.005G223500	ATPT2,PHT1;4	phosphate transporter 1;4
Conserved	ptc-miR399i	Potri.008G024100	Potri.010G236100	At-A/N-InvE,INV-E	alkaline/neutral invertase
Conserved	ptc-miR399i	Potri.010G236100	Potri.008G024100	At-A/N-InvE,INV-E	alkaline/neutral invertase
Conserved	ptc-miR408	Potri.010G123200	Potri.008G121800	0	Adenine nucleotide alpha hydrolases-like superfamily protein
Conserved	ptc-miR408	Potri.002G065100	Potri.005G195900	0	Protein kinase superfamily protein
Conserved	ptc-miR408	Potri.011G009900	Potri.004G005900	0	ERD (early-responsive to dehydration stress) family protein
Conserved	ptc-miR408	Potri.004G005900	Potri.011G009900;Potri.011G009800	0	ERD (early-responsive to dehydration stress) family protein
Conserved	ptc-miR408	Potri.018G114900	Potri.006G190600	CLO,GFA1,MEE5	Ribosomal protein S5/Elongation factor G/III/V family protein
Specific	ptc-miR476a	Potri.008G156300	Potri.010G083200	0	Ribosomal protein S3Ae
Specific	ptc-miR476a	Potri.010G083200	Potri.008G156300	0	Ribosomal protein S3Ae
Specific	ptc-miR476a	Potri.009G085400	Potri.001G289800	ATPRP40A,PRP40A	pre-mRNA-processing protein 40A
Specific	ptc-miR476a	Potri.019G089900	Potri.013G118000	0	0
Specific	ptc-miR476b	Potri.018G128800	Potri.006G067200	AtENODL14,ENODL14	early nodulin-like protein 14
Specific	ptc-miR476b	Potri.011G045100	Potri.004G036600	SC3	secretory carrier 3
Specific	ptc-miR476b	Potri.013G105900	Potri.019G079300	0	Sec14p-like phosphatidylinositol transfer family protein
Specific	ptc-miR476b	Potri.006G035500	Potri.016G033300	0	Transcription elongation factor (TFIIS) family protein
Specific	ptc-miR476b	Potri.010G217900	Potri.008G043700	0	mitochondrial substrate carrier family protein
Specific	ptc-miR478e	Potri.015G046200	Potri.012G055600	AtMYB116,MYB116	myb domain protein 116
Specific	ptc-miR478e	Potri.014G016000	Potri.002G118500	NPGR1	no pollen germination related 1
Specific	ptc-miR478e	Potri.005G047600	Potri.013G034800	ATEDR1,EDR1	Protein kinase superfamily protein
Specific	ptc-miR478e	Potri.001G054500	Potri.003G173800	MEE4	GRIM-19 protein
Conserved	ptc-miR530a	Potri.003G124600	Potri.001G106700	0	Myosin heavy chain-related protein
Conserved	ptc-miR530a	Potri.002G234500	Potri.014G147900	ATGWD3,OK1,PWD	catalytics;carbohydrate kinases;phosphoglucan, water dikinases
Conserved	ptc-miR530a	Potri.008G116500	Potri.010G129800	0	NAD(P)-binding Rossmann-fold superfamily protein
Specific	ptc-miR6425a	Potri.008G215300	Potri.010G022300	EMB40,FASS,FASS 2,FS1,GDO,TON2	tonneau 2 (TON2)
Specific	ptc-miR6425a	Potri.002G022300	Potri.T155200	0	ER lumen protein retaining receptor family protein
Specific	ptc-miR6425a	Potri.001G240500	Potri.009G035400;Potri.009G031500	0	Protein kinase superfamily protein
Specific	ptc-miR6425a	Potri.001G246200	Potri.009G039300	0	Protein of unknown function (DUF3527)
Specific	ptc-miR6425b	Potri.008G215300	Potri.010G022300	EMB40,FASS,FASS 2,FS1,GDO,TON2	tonneau 2 (TON2)
Specific	ptc-miR6425b	Potri.002G022300	Potri.T155200	0	ER lumen protein retaining receptor family protein
Specific	ptc-miR6425b	Potri.001G240500	Potri.009G035400;Potri.009G031500	0	Protein kinase superfamily protein
Specific	ptc-miR6425b	Potri.001G246200	Potri.009G039300	0	Protein of unknown function (DUF3527)
Specific	ptc-miR6425c	Potri.008G215300	Potri.010G022300	EMB40,FASS,FASS 2,FS1,GDO,TON2	tonneau 2 (TON2)
Specific	ptc-miR6425c	Potri.002G022300	Potri.T155200	0	ER lumen protein retaining receptor family protein
Specific	ptc-miR6425c	Potri.001G240500	Potri.009G035400;Potri.009G031500	0	Protein kinase superfamily protein
Specific	ptc-miR6425c	Potri.001G246200	Potri.009G039300	0	Protein of unknown function (DUF3527)
Specific	ptc-miR6425d	Potri.008G215300	Potri.010G022300	EMB40,FASS,FASS 2,FS1,GDO,TON2	tonneau 2 (TON2)
Specific	ptc-miR6425d	Potri.002G022300	Potri.T155200	0	ER lumen protein retaining receptor family protein
Specific	ptc-miR6425d	Potri.001G240500	Potri.009G035400;Potri.009G031500	0	Protein kinase superfamily protein
Specific	ptc-miR6425d	Potri.001G246200	Potri.009G039300	0	Protein of unknown function (DUF3527)
Specific	ptc-miR6425e	Potri.008G215300	Potri.010G022300	EMB40,FASS,FASS 2,FS1,GDO,TON2	tonneau 2 (TON2)
Specific	ptc-miR6425e	Potri.002G022300	Potri.T155200	0	ER lumen protein retaining receptor family protein
Specific	ptc-miR6425e	Potri.001G240500	Potri.009G035400;Potri.009G031500	0	Protein kinase superfamily protein
Specific	ptc-miR6425e	Potri.001G246200	Potri.009G039300	0	Protein of unknown function (DUF3527)
Specific	ptc-miR6427	Potri.005G122400	Potri.007G024000	0	Late embryogenesis abundant (LEA) protein
Specific	ptc-miR6438a	Potri.014G040800	Potri.002G133300	0	metalloendopeptidases;zinc ion binding
Specific	ptc-miR6438a	Potri.003G195700	Potri.001G028000	NQR	NADPH:quinone oxidoreductase
Specific	ptc-miR6438b	Potri.002G064400	Potri.005G196700	FB,GI	gigantea protein (GI)
Specific	ptc-miR6438b	Potri.014G089800	Potri.002G163900	0	RING/U-box superfamily protein
Specific	ptc-miR6445a	Potri.002G011700	Potri.005G249400	0	Protein of unknown function (DUF630 and DUF632)
Specific	ptc-miR6445a	Potri.017G090800	Potri.004G124500	GAUT14	galacturonosyltransferase 14
Specific	ptc-miR6445a	Potri.017G110700	Potri.004G104800	ATPCME,PCME	prenylcysteine methylesterase
Specific	ptc-miR6445a	Potri.008G018400	Potri.010G242800	0	bZIP protein
Specific	ptc-miR6445a	Potri.010G048400	Potri.008G185300	0	Melibiase family protein
Specific	ptc-miR6445a	Potri.007G093400	Potri.005G075100	CAMTA3,SR1	signal responsive 1
Specific	ptc-miR6445a	Potri.010G033500	Potri.008G194900	ATVDAC1,VDAC1	voltage dependent anion channel 1
Specific	ptc-miR6445b	Potri.002G011700	Potri.005G249400	0	Protein of unknown function (DUF630 and DUF632)
Specific	ptc-miR6445b	Potri.017G090800	Potri.004G124500	GAUT14	galacturonosyltransferase 14
Specific	ptc-miR6445b	Potri.017G110700	Potri.004G104800	ATPCME,PCME	prenylcysteine methylesterase
Specific	ptc-miR6445b	Potri.008G018400	Potri.010G242800	0	bZIP protein
Specific	ptc-miR6445b	Potri.010G048400	Potri.008G185300	0	Melibiase family protein
Specific	ptc-miR6445b	Potri.007G093400	Potri.005G075100	CAMTA3,SR1	signal responsive 1
Specific	ptc-miR6445b	Potri.010G033500	Potri.008G194900	ATVDAC1,VDAC1	voltage dependent anion channel 1
Specific	ptc-miR6459a	Potri.006G239500	Potri.018G043500	0	RING/U-box superfamily protein
Specific	ptc-miR6459a	Potri.011G070000	Potri.004G060800	0	0
Specific	ptc-miR6459a	Potri.015G078100	Potri.012G082300	SKIP16	SKP1/ASK-interacting protein 16
Specific	ptc-miR6459a	Potri.002G059300	Potri.005G202700	0	Kinase-related protein of unknown function (DUF1296)
Specific	ptc-miR6459a	Potri.001G009600	Potri.003G215900	CMT3	chromomethylase 3
Specific	ptc-miR6459a	Potri.014G100000	Potri.002G172400	0	cellular apoptosis susceptibility protein, putative / importin-alpha re-exporter, putative
Specific	ptc-miR6459a	Potri.005G140200	Potri.007G045800	CLF,ICU1,SDG1,SET1	SET domain-containing protein
Specific	ptc-miR6459b	Potri.014G100000	Potri.002G172400	0	cellular apoptosis susceptibility protein, putative / importin-alpha re-exporter, putative
Specific	ptc-miR6459b	Potri.006G239500	Potri.018G043500	0	RING/U-box superfamily protein
Specific	ptc-miR6459b	Potri.011G070000	Potri.004G060800	0	0
Specific	ptc-miR6459b	Potri.015G078100	Potri.012G082300	SKIP16	SKP1/ASK-interacting protein 16
Specific	ptc-miR6459b	Potri.010G182400	Potri.008G075000	0	0
Specific	ptc-miR6459b	Potri.005G259600	Potri.002G001600	0	Protein kinase superfamily protein
Specific	ptc-miR6459b	Potri.010G107200	Potri.008G134100	0	0
Specific	ptc-miR6459b	Potri.004G037200	Potri.011G045700	0	0
Specific	ptc-miR6459b	Potri.002G067600	Potri.005G192800	0	Cupredoxin superfamily protein
Specific	ptc-miR6459b	Potri.010G074700	Potri.008G163600	ATCSLG1,CSLG1	cellulose synthase like G1
Specific	ptc-miR7817a	Potri.001G394600	Potri.011G112800	UBP25	ubiquitin-specific protease 25
Specific	ptc-miR7817a	Potri.004G160800	Potri.009G121700	0	0
Specific	ptc-miR7817a	Potri.009G066800	Potri.001G272300	0	plectin-related
Specific	ptc-miR7817a	Potri.012G088100	Potri.015G083800;Potri.015G080800	0	Leucine-rich receptor-like protein kinase family protein
Specific	ptc-miR7817a	Potri.017G075200	Potri.004G130400	UCH2	Peptidase C12, ubiquitin carboxyl-terminal hydrolase 1
Specific	ptc-miR7828	Potri.004G112800	Potri.017G101900;Potri.017G102000	MDH	malate dehydrogenase
Specific	ptc-miR7828	Potri.002G169700	Potri.014G097200	0	nucleotidyltransferases
Specific	ptc-miR7828	Potri.004G061600	Potri.011G071000	UNE1	Plant protein of unknown function (DUF641)
Specific	ptc-miR7828	Potri.005G099000	Potri.007G064400	0	RING/U-box superfamily protein
Specific	ptc-miR7828	Potri.003G091800	Potri.001G142400	IKU1	VQ motif-containing protein
Specific	ptc-miR7828	Potri.013G105900	Potri.019G079300	0	Sec14p-like phosphatidylinositol transfer family protein
Specific	ptc-miR7828	Potri.008G100500	Potri.010G152000	0	Pectin lyase-like superfamily protein
Specific	ptc-miR7840	Potri.004G182900	Potri.009G142900	0	Protein of unknown function (DUF630 and DUF632)
Specific	ptc-miR7840	Potri.006G102800	Potri.016G121400;Potri.016G121300	AMT2,AMT2;1,ATAMT2	ammonium transporter 2
Specific	ptc-miR7840	Potri.001G153200	Potri.003G081300	0	Acyl-CoA N-acyltransferase with RING/FYVE/PHD-type zinc finger protein
Specific	ptc-miR7840	Potri.008G161500	Potri.010G077800	DRIP2	DREB2A-interacting protein 2
Specific	ptc-miR7840	Potri.010G072900	Potri.008G165700	bHLH104	basic helix-loop-helix (bHLH) DNA-binding superfamily protein
Specific	ptc-miR7840	Potri.017G128300	Potri.004G088400	DegP7	DegP protease 7
Specific	ptc-miRN9	Potri.015G005100	Potri.012G021300	0	0
Specific	ptc-miRN9	Potri.012G093500	Potri.015G090900	0	26S proteasome, regulatory subunit Rpn7;Proteasome component (PCI) domain
Specific	ptc-miRN9	Potri.015G090900	Potri.012G093500	0	26S proteasome, regulatory subunit Rpn7;Proteasome component (PCI) domain
Specific	ptc-miRN9	Potri.016G105700	Potri.006G093800	AtIPCS1	Arabidopsis Inositol phosphorylceramide synthase 1
Specific	ptc-miRN9	Potri.009G113700	Potri.004G152400	ATPI4K ALPHA	Phosphatidylinositol 3- and 4-kinase family protein
Specific	ptc-miRN9	Potri.010G104600	Potri.008G136400	0	MAC/Perforin domain-containing protein
Specific	ptc-miRN9	Potri.005G222500	Potri.002G040200	CPUORF7	conserved peptide upstream open reading frame 7
Specific	ptc-miRN10	Potri.011G129500	Potri.001G410600	0	basic helix-loop-helix (bHLH) DNA-binding superfamily protein
Specific	ptc-miRN10	Potri.006G046500	Potri.016G043100	ACA11	autoinhibited Ca2+-ATPase 11
Specific	ptc-miRN10	Potri.010G219000	Potri.008G042800	0	0
Specific	ptc-miRN10	Potri.008G042800	Potri.010G219000	0	0
Specific	ptc-miRN10	Potri.001G155300	Potri.003G079500	0	myb-like transcription factor family protein
Specific	ptc-miRN10	Potri.013G017100	Potri.005G025500	0	0
Specific	ptc-miRN10	Potri.016G067000	Potri.006G201000	0	0
Specific	ptc-miRN10	Potri.007G123900	Potri.017G036400	EMB1270	Pentatricopeptide repeat (PPR) superfamily protein
Specific	ptc-miRN10	Potri.012G103300	Potri.015G101900	0	DHHC-type zinc finger family protein
Specific	ptc-miRN11	Potri.014G003600	Potri.014G011400;Potri.004G170700;Potri.014G001900;Potri.004G170400;Potri.014G002200;Potri.004G170300;;Potri.004G169800	0	LRR and NB-ARC domains-containing disease resistance protein
Specific	ptc-miRN11	Potri.014G003600	Potri.014G011400;Potri.004G170700;Potri.014G001900;Potri.004G170400;Potri.014G002200;Potri.004G170300;;Potri.004G169800	0	LRR and NB-ARC domains-containing disease resistance protein
Specific	ptc-miRN11	Potri.006G212000	Potri.016G078900;Potri.016G078800	0	Serine protease inhibitor, potato inhibitor I-type family protein
Specific	ptc-miRN12	Potri.006G201900	Potri.016G068200	NF-YA10	nuclear factor Y, subunit A10
Specific	ptc-miRN12	Potri.016G068200	Potri.006G201900	NF-YA10	nuclear factor Y, subunit A10
Specific	ptc-miRN14	Potri.011G068600	Potri.004G059000	ATSK21,BIN2,DWF12,SK21,UCU1	Protein kinase superfamily protein
Specific	ptc-miRN14	Potri.008G121000	Potri.010G124400	0	0
Specific	ptc-miRN15	Potri.011G068600	Potri.004G059000	ATSK21,BIN2,DWF12,SK21,UCU1	Protein kinase superfamily protein
Specific	ptc-miRN15	Potri.008G121000	Potri.010G124400	0	0
Specific	ptc-miRN16	Potri.007G085300	Potri.005G082200	0	Protein kinase superfamily protein
Specific	ptc-miRN16	Potri.001G251100	Potri.009G045600	ATPDR3,PDR3	pleiotropic drug resistance 3
Specific	ptc-miRN17	Potri.006G118900	Potri.016G096800	0	P-loop containing nucleoside triphosphate hydrolases superfamily protein
Specific	ptc-miRN18	Potri.004G001300	Potri.T157700	ATCES1	Alkaline phytoceramidase (aPHC)
Specific	ptc-miRN18	Potri.011G093600	Potri.001G368200	0	0
Specific	ptc-miRN18	Potri.001G235200	Potri.009G027100	0	Protein of unknown function (DUF1635)
Specific	ptc-miRN18	Potri.008G047600	Potri.010G213800	0	0
Specific	ptc-miRN18	Potri.018G028900	Potri.006G252500	0	Nucleotide-sugar transporter family protein
Specific	ptc-miRN18	Potri.009G100600	Potri.004G140400	0	Putative endonuclease or glycosyl hydrolase
Specific	ptc-miRN18	Potri.004G140400	Potri.009G100600	0	Putative endonuclease or glycosyl hydrolase
Specific	ptc-miRN19	Potri.016G053900	Potri.006G053600	0	0
Specific	ptc-miRN19	Potri.002G075700	Potri.005G184700	0	0
Specific	ptc-miRN20	Potri.001G112800	Potri.003G119400	0	Protein of unknown function (DUF1191)
Specific	ptc-miRN20	Potri.006G016900	Potri.016G008800	0	Uncharacterised protein family (UPF0497)
Specific	ptc-miRN20	Potri.016G008800	Potri.006G016900	0	Uncharacterised protein family (UPF0497)
Specific	ptc-miRN20	Potri.015G034900	Potri.012G041200;Potri.012G044200	0	Tetratricopeptide repeat (TPR)-like superfamily protein
Specific	ptc-miRN20	Potri.017G053400	Potri.001G313200	0	RNI-like superfamily protein
Specific	ptc-miRN20	Potri.001G352500	Potri.011G079100	ATKCO6,ATTPK3,KCO6,TPK3	Ca2+ activated outward rectifying K+ channel 6
Specific	ptc-miRN20	Potri.013G048700	Potri.019G021600	emb2458	FtsH extracellular protease family
Specific	ptc-miRN21	Potri.014G003600	Potri.014G011400;Potri.004G170700;Potri.014G001900;Potri.004G170400;Potri.014G002200;Potri.004G170300;;Potri.004G169800	0	LRR and NB-ARC domains-containing disease resistance protein
Specific	ptc-miRN21	Potri.014G003600	Potri.014G011400;Potri.004G170700;Potri.014G001900;Potri.004G170400;Potri.014G002200;Potri.004G170300;;Potri.004G169800	0	LRR and NB-ARC domains-containing disease resistance protein
Specific	ptc-miRN21	Potri.006G212000	Potri.016G078900;Potri.016G078800	0	Serine protease inhibitor, potato inhibitor I-type family protein
Specific	ptc-miRN2	Potri.009G109400	Potri.004G148300	ATXLG1,XLG1	extra-large G-protein 1
Specific	ptc-miRN3	Potri.005G250500	Potri.002G010700	0	HXXXD-type acyl-transferase family protein
Specific	ptc-miRN3	Potri.002G206100	Potri.014G131400	ATTSPO,TSPO	TSPO(outer membrane tryptophan-rich sensory protein)-related
Specific	ptc-miRN3	Potri.018G098400	Potri.006G176600	XBAT32	XB3 ortholog 2 in Arabidopsis thaliana
Specific	ptc-miRN4	Potri.011G069500	Potri.004G059500	AtRLP51,RLP51	receptor like protein 51
Specific	ptc-miRN4	Potri.004G059500	Potri.011G069500	AtRLP51,RLP51	receptor like protein 51
Specific	ptc-miRN4	Potri.018G027100	Potri.006G254700	0	0
Specific	ptc-miRN4	Potri.002G111000	Potri.005G152900	0	binding
Specific	ptc-miRN4	Potri.005G053200	Potri.013G040700	AtbZIP63,BZO2H3	bZIP transcription factor family protein
Specific	ptc-miRN4	Potri.001G254300	Potri.009G049100	0	DNA binding;zinc ion binding;DNA binding
Specific	ptc-miRN4	Potri.006G088400	Potri.016G101000	RLK	receptor lectin kinase
Specific	ptc-miRN4	Potri.009G049100	Potri.001G254300	0	DNA binding;zinc ion binding;DNA binding
Specific	ptc-miRN4	Potri.006G105000	Potri.016G127900	0	Protein phosphatase 2C family protein
Specific	ptc-miRN5	Potri.004G157700	Potri.009G119500	0	Sec14p-like phosphatidylinositol transfer family protein
Specific	ptc-miRN5	Potri.006G073100	Potri.018G140200	0	0
Specific	ptc-miRN5	Potri.001G448900	Potri.011G152600	0	RING/FYVE/PHD zinc finger superfamily protein
Specific	ptc-miRN5	Potri.001G318300	Potri.017G058000	0	F-box family protein
Specific	ptc-miRN5	Potri.012G023100	Potri.015G006600	GIF3	GRF1-interacting factor 3
Specific	ptc-miRN6	Potri.017G026200	Potri.007G131600	0	Plant protein of unknown function (DUF936)
Specific	ptc-miRN6	Potri.013G048700	Potri.019G021600	emb2458	FtsH extracellular protease family
Specific	ptc-miRN6	Potri.001G012200	Potri.003G214200	ATGSL12,gsl12	glucan synthase-like 12
Specific	ptc-miRN7	Potri.005G141200	Potri.007G046900	0	Leucine-rich repeat protein kinase family protein
Specific	ptc-miRN7	Potri.001G100100	Potri.003G131600	SP1L2	SPIRAL1-like2
Specific	ptc-miRN7	Potri.003G123500	Potri.001G108200	0	Plant invertase/pectin methylesterase inhibitor superfamily protein
Specific	ptc-miRN7	Potri.001G108200	Potri.003G123500	0	Plant invertase/pectin methylesterase inhibitor superfamily protein
Specific	ptc-miRN7	Potri.004G074800	Potri.017G144600	ATHDG11,EDT1,HDG11	homeodomain GLABROUS 11
Specific	ptc-miRN7	Potri.003G201000	Potri.001G024600	ATPUB44,PUB44,SAUL1	senescence-associated E3 ubiquitin ligase 1
Specific	ptc-miRN7	Potri.010G134300	Potri.008G113300	ZIP7	zinc transporter 7 precursor
Specific	ptc-miRN7	Potri.016G133700	Potri.006G107500	0	0
Specific	ptc-miRN7	Potri.014G098600	Potri.002G170900	0	Tetratricopeptide repeat (TPR)-like superfamily protein
Specific	ptc-miRN7	Potri.006G103400	Potri.016G123800	ATEOL1,ETO1	tetratricopeptide repeat (TPR)-containing protein
Specific	ptc-miRN8	Potri.009G022900	Potri.001G229000	0	Emsy N Terminus (ENT)/ plant Tudor-like domains-containing protein
Specific	ptc-miRN8	Potri.001G229000	Potri.009G022900	0	Emsy N Terminus (ENT)/ plant Tudor-like domains-containing protein
Specific	ptc-miR1446a	Potri.012G103200	Potri.015G101400;Potri.015G101500	0	Nodulin MtN3 family protein
Specific	ptc-miR1446a	Potri.014G043600	Potri.002G135000	ADL1E,ADL4,ADLP2,DL1E,DRP1E,EDR3	DYNAMIN-like 1E
Specific	ptc-miR1446a	Potri.001G120800	Potri.003G112200	0	Exostosin family protein
Specific	ptc-miR1446a	Potri.001G252500	Potri.009G046700	0	Double Clp-N motif-containing P-loop nucleoside triphosphate hydrolases superfamily protein
Specific	ptc-miR1446a	Potri.013G010800	Potri.005G020300	0	Chaperone DnaJ-domain superfamily protein
Specific	ptc-miR1446a	Potri.005G215100	Potri.002G048000	MGP	C2H2 and C2HC zinc fingers superfamily protein
Specific	ptc-miR1446a	Potri.016G068100	Potri.006G201700	AGL80,FEM111	AGAMOUS-like 80
Specific	ptc-miR1446a	Potri.015G055200	Potri.012G057300	ATPK3,PK3	serine/threonine protein kinase 3
Specific	ptc-miR1446a	Potri.009G157700	Potri.004G195800	0	Pyridine nucleotide-disulphide oxidoreductase family protein
Specific	ptc-miR1446a	Potri.006G049700	Potri.016G056400	0	Integrase-type DNA-binding superfamily protein
Specific	ptc-miR1446b	Potri.012G103200	Potri.015G101400;Potri.015G101500	0	Nodulin MtN3 family protein
Specific	ptc-miR1446b	Potri.014G043600	Potri.002G135000	ADL1E,ADL4,ADLP2,DL1E,DRP1E,EDR3	DYNAMIN-like 1E
Specific	ptc-miR1446b	Potri.001G120800	Potri.003G112200	0	Exostosin family protein
Specific	ptc-miR1446b	Potri.001G252500	Potri.009G046700	0	Double Clp-N motif-containing P-loop nucleoside triphosphate hydrolases superfamily protein
Specific	ptc-miR1446b	Potri.013G010800	Potri.005G020300	0	Chaperone DnaJ-domain superfamily protein
Specific	ptc-miR1446b	Potri.005G215100	Potri.002G048000	MGP	C2H2 and C2HC zinc fingers superfamily protein
Specific	ptc-miR1446b	Potri.016G068100	Potri.006G201700	AGL80,FEM111	AGAMOUS-like 80
Specific	ptc-miR1446b	Potri.015G055200	Potri.012G057300	ATPK3,PK3	serine/threonine protein kinase 3
Specific	ptc-miR1446b	Potri.009G157700	Potri.004G195800	0	Pyridine nucleotide-disulphide oxidoreductase family protein
Specific	ptc-miR1446b	Potri.006G049700	Potri.016G056400	0	Integrase-type DNA-binding superfamily protein
Specific	ptc-miR1446c	Potri.012G103200	Potri.015G101400;Potri.015G101500	0	Nodulin MtN3 family protein
Specific	ptc-miR1446c	Potri.001G120800	Potri.003G112200	0	Exostosin family protein
Specific	ptc-miR1446c	Potri.014G043600	Potri.002G135000	ADL1E,ADL4,ADLP2,DL1E,DRP1E,EDR3	DYNAMIN-like 1E
Specific	ptc-miR1446c	Potri.013G010800	Potri.005G020300	0	Chaperone DnaJ-domain superfamily protein
Specific	ptc-miR1446c	Potri.001G252500	Potri.009G046700	0	Double Clp-N motif-containing P-loop nucleoside triphosphate hydrolases superfamily protein
Specific	ptc-miR1446c	Potri.005G215100	Potri.002G048000	MGP	C2H2 and C2HC zinc fingers superfamily protein
Specific	ptc-miR1446c	Potri.009G157700	Potri.004G195800	0	Pyridine nucleotide-disulphide oxidoreductase family protein
Specific	ptc-miR1446d	Potri.012G103200	Potri.015G101400;Potri.015G101500	0	Nodulin MtN3 family protein
Specific	ptc-miR1446d	Potri.001G120800	Potri.003G112200	0	Exostosin family protein
Specific	ptc-miR1446d	Potri.014G043600	Potri.002G135000	ADL1E,ADL4,ADLP2,DL1E,DRP1E,EDR3	DYNAMIN-like 1E
Specific	ptc-miR1446d	Potri.013G010800	Potri.005G020300	0	Chaperone DnaJ-domain superfamily protein
Specific	ptc-miR1446d	Potri.001G252500	Potri.009G046700	0	Double Clp-N motif-containing P-loop nucleoside triphosphate hydrolases superfamily protein
Specific	ptc-miR1446d	Potri.005G215100	Potri.002G048000	MGP	C2H2 and C2HC zinc fingers superfamily protein
Specific	ptc-miR1446d	Potri.009G157700	Potri.004G195800	0	Pyridine nucleotide-disulphide oxidoreductase family protein
Specific	ptc-miR1446e	Potri.012G103200	Potri.015G101400;Potri.015G101500	0	Nodulin MtN3 family protein
Specific	ptc-miR1446e	Potri.001G120800	Potri.003G112200	0	Exostosin family protein
Specific	ptc-miR1446e	Potri.014G043600	Potri.002G135000	ADL1E,ADL4,ADLP2,DL1E,DRP1E,EDR3	DYNAMIN-like 1E
Specific	ptc-miR1446e	Potri.013G010800	Potri.005G020300	0	Chaperone DnaJ-domain superfamily protein
Specific	ptc-miR1446e	Potri.001G252500	Potri.009G046700	0	Double Clp-N motif-containing P-loop nucleoside triphosphate hydrolases superfamily protein
Specific	ptc-miR1446e	Potri.005G215100	Potri.002G048000	MGP	C2H2 and C2HC zinc fingers superfamily protein
Specific	ptc-miR1446e	Potri.009G157700	Potri.004G195800	0	Pyridine nucleotide-disulphide oxidoreductase family protein
Specific	ptc-miR1447	Potri.015G037400	Potri.012G044500;Potri.012G022800	0	Leucine-rich repeat protein kinase family protein
Specific	ptc-miR1447	Potri.017G031900	Potri.007G127000	CPK24	calcium-dependent protein kinase 24
Specific	ptc-miR1447	Potri.010G212100	Potri.008G048900	0	Cleavage and polyadenylation specificity factor (CPSF) A subunit protein
Specific	ptc-miR1447	Potri.008G048900	Potri.010G212100	0	Cleavage and polyadenylation specificity factor (CPSF) A subunit protein
Specific	ptc-miR1447	Potri.008G080800	Potri.010G175500	ECT8	evolutionarily conserved C-terminal region 8
Specific	ptc-miR1448	Potri.006G154800	Potri.018G074200	0	RING/FYVE/PHD zinc finger superfamily protein
Specific	ptc-miR1448	Potri.004G222600	Potri.003G009300	ATCNFU2,NFU2	NIFU-like protein 2
Specific	ptc-miR1448	Potri.006G113900	Potri.016G143600	PECT1	phosphorylethanolamine cytidylyltransferase 1
Specific	ptc-miR1448	Potri.018G137400	Potri.004G134600	ATSGS3,SGS3	XS domain-containing protein / XS zinc finger domain-containing protein-related
Specific	ptc-miR1448	Potri.018G053800	Potri.006G229400	0	Protein kinase superfamily protein
Specific	ptc-miR1448	Potri.001G120300	Potri.003G112700	SKU5	Cupredoxin superfamily protein
Specific	ptc-miR1448	Potri.011G010500	Potri.004G005100	SRF8	STRUBBELIG-receptor family 8
Specific	ptc-miR1448	Potri.010G204300	Potri.008G055500	ACT11	actin-11
Conserved	ptc-miR156a	Potri.003G111600	Potri.001G121700	ORP2A	OSBP(oxysterol binding protein)-related protein 2A
Conserved	ptc-miR156a	Potri.019G002300	Potri.001G306800	0	Fasciclin-like arabinogalactan family protein
Conserved	ptc-miR156a	Potri.014G042200	Potri.002G134100	0	Phospholipid/glycerol acyltransferase family protein
Conserved	ptc-miR156a	Potri.010G052800	Potri.008G181200	0	Leucine-rich repeat protein kinase family protein
Conserved	ptc-miR156a	Potri.004G159300	Potri.009G120800	BLH6	BEL1-like homeodomain 6
Conserved	ptc-miR156a	Potri.002G033400	Potri.005G229700	APL2	ADPGLC-PPase large subunit
Conserved	ptc-miR156a	Potri.001G286400	Potri.009G080600	HEMA1	Glutamyl-tRNA reductase family protein
Conserved	ptc-miR156b	Potri.003G111600	Potri.001G121700	ORP2A	OSBP(oxysterol binding protein)-related protein 2A
Conserved	ptc-miR156b	Potri.019G002300	Potri.001G306800	0	Fasciclin-like arabinogalactan family protein
Conserved	ptc-miR156b	Potri.014G042200	Potri.002G134100	0	Phospholipid/glycerol acyltransferase family protein
Conserved	ptc-miR156b	Potri.010G052800	Potri.008G181200	0	Leucine-rich repeat protein kinase family protein
Conserved	ptc-miR156b	Potri.004G159300	Potri.009G120800	BLH6	BEL1-like homeodomain 6
Conserved	ptc-miR156b	Potri.002G033400	Potri.005G229700	APL2	ADPGLC-PPase large subunit
Conserved	ptc-miR156b	Potri.001G286400	Potri.009G080600	HEMA1	Glutamyl-tRNA reductase family protein
Conserved	ptc-miR156c	Potri.003G111600	Potri.001G121700	ORP2A	OSBP(oxysterol binding protein)-related protein 2A
Conserved	ptc-miR156c	Potri.019G002300	Potri.001G306800	0	Fasciclin-like arabinogalactan family protein
Conserved	ptc-miR156c	Potri.014G042200	Potri.002G134100	0	Phospholipid/glycerol acyltransferase family protein
Conserved	ptc-miR156c	Potri.010G052800	Potri.008G181200	0	Leucine-rich repeat protein kinase family protein
Conserved	ptc-miR156c	Potri.004G159300	Potri.009G120800	BLH6	BEL1-like homeodomain 6
Conserved	ptc-miR156c	Potri.002G033400	Potri.005G229700	APL2	ADPGLC-PPase large subunit
Conserved	ptc-miR156c	Potri.001G286400	Potri.009G080600	HEMA1	Glutamyl-tRNA reductase family protein
Conserved	ptc-miR156d	Potri.003G111600	Potri.001G121700	ORP2A	OSBP(oxysterol binding protein)-related protein 2A
Conserved	ptc-miR156d	Potri.019G002300	Potri.001G306800	0	Fasciclin-like arabinogalactan family protein
Conserved	ptc-miR156d	Potri.014G042200	Potri.002G134100	0	Phospholipid/glycerol acyltransferase family protein
Conserved	ptc-miR156d	Potri.010G052800	Potri.008G181200	0	Leucine-rich repeat protein kinase family protein
Conserved	ptc-miR156d	Potri.004G159300	Potri.009G120800	BLH6	BEL1-like homeodomain 6
Conserved	ptc-miR156d	Potri.002G033400	Potri.005G229700	APL2	ADPGLC-PPase large subunit
Conserved	ptc-miR156d	Potri.001G286400	Potri.009G080600	HEMA1	Glutamyl-tRNA reductase family protein
Conserved	ptc-miR156e	Potri.003G111600	Potri.001G121700	ORP2A	OSBP(oxysterol binding protein)-related protein 2A
Conserved	ptc-miR156e	Potri.019G002300	Potri.001G306800	0	Fasciclin-like arabinogalactan family protein
Conserved	ptc-miR156e	Potri.014G042200	Potri.002G134100	0	Phospholipid/glycerol acyltransferase family protein
Conserved	ptc-miR156e	Potri.010G052800	Potri.008G181200	0	Leucine-rich repeat protein kinase family protein
Conserved	ptc-miR156e	Potri.004G159300	Potri.009G120800	BLH6	BEL1-like homeodomain 6
Conserved	ptc-miR156e	Potri.002G033400	Potri.005G229700	APL2	ADPGLC-PPase large subunit
Conserved	ptc-miR156e	Potri.001G286400	Potri.009G080600	HEMA1	Glutamyl-tRNA reductase family protein
Conserved	ptc-miR156f	Potri.003G111600	Potri.001G121700	ORP2A	OSBP(oxysterol binding protein)-related protein 2A
Conserved	ptc-miR156f	Potri.019G002300	Potri.001G306800	0	Fasciclin-like arabinogalactan family protein
Conserved	ptc-miR156f	Potri.014G042200	Potri.002G134100	0	Phospholipid/glycerol acyltransferase family protein
Conserved	ptc-miR156f	Potri.010G052800	Potri.008G181200	0	Leucine-rich repeat protein kinase family protein
Conserved	ptc-miR156f	Potri.004G159300	Potri.009G120800	BLH6	BEL1-like homeodomain 6
Conserved	ptc-miR156f	Potri.002G033400	Potri.005G229700	APL2	ADPGLC-PPase large subunit
Conserved	ptc-miR156f	Potri.001G286400	Potri.009G080600	HEMA1	Glutamyl-tRNA reductase family protein
Conserved	ptc-miR156g	Potri.001G037700	Potri.003G187300	0	Galactose mutarotase-like superfamily protein
Conserved	ptc-miR156g	Potri.001G076100	Potri.003G154600	CAT5	cationic amino acid transporter 5
Conserved	ptc-miR156g	Potri.013G132300	Potri.019G100800	ATRMA1,RMA1	RING membrane-anchor 1
Conserved	ptc-miR156g	Potri.012G082400	Potri.015G078200	0	0
Conserved	ptc-miR156g	Potri.003G136300	Potri.001G094800	CRF2,TMO3	cytokinin response factor 2
Conserved	ptc-miR156g	Potri.003G154600	Potri.001G076100	CAT5	cationic amino acid transporter 5
Conserved	ptc-miR156g	Potri.006G219600	Potri.018G048500	0	Chalcone-flavanone isomerase family protein
Conserved	ptc-miR156g	Potri.006G034900	Potri.016G032600	0	Homeodomain-like superfamily protein
Conserved	ptc-miR156g	Potri.002G169800	Potri.014G097700	0	P-loop containing nucleoside triphosphate hydrolases superfamily protein
Conserved	ptc-miR156g	Potri.013G136100	Potri.019G102800	EPF1	epidermal patterning factor 1
Conserved	ptc-miR156g	Potri.004G055000	Potri.011G065100	TBL38	TRICHOME BIREFRINGENCE-LIKE 38
Conserved	ptc-miR156g	Potri.017G015300	Potri.017G015600;;Potri.017G015500	0	LRR and NB-ARC domains-containing disease resistance protein
Conserved	ptc-miR156g	Potri.017G015200	Potri.017G015500	0	LRR and NB-ARC domains-containing disease resistance protein
Conserved	ptc-miR156g	Potri.012G139600	Potri.015G142000	ATRBL3,RBL3	RHOMBOID-like protein 3
Conserved	ptc-miR156h	Potri.001G076100	Potri.003G154600	CAT5	cationic amino acid transporter 5
Conserved	ptc-miR156h	Potri.014G042200	Potri.002G134100	0	Phospholipid/glycerol acyltransferase family protein
Conserved	ptc-miR156h	Potri.003G154600	Potri.001G076100	CAT5	cationic amino acid transporter 5
Conserved	ptc-miR156h	Potri.013G136100	Potri.019G102800	EPF1	epidermal patterning factor 1
Conserved	ptc-miR156h	Potri.001G037700	Potri.003G187300	0	Galactose mutarotase-like superfamily protein
Conserved	ptc-miR156h	Potri.004G055000	Potri.011G065100	TBL38	TRICHOME BIREFRINGENCE-LIKE 38
Conserved	ptc-miR156h	Potri.017G015300	Potri.017G015600;;Potri.017G015500	0	LRR and NB-ARC domains-containing disease resistance protein
Conserved	ptc-miR156h	Potri.017G015200	Potri.017G015500	0	LRR and NB-ARC domains-containing disease resistance protein
Conserved	ptc-miR156h	Potri.006G219600	Potri.018G048500	0	Chalcone-flavanone isomerase family protein
Conserved	ptc-miR156h	Potri.002G169800	Potri.014G097700	0	P-loop containing nucleoside triphosphate hydrolases superfamily protein
Conserved	ptc-miR156j	Potri.002G050900	Potri.005G211400	0	0
Conserved	ptc-miR156j	Potri.008G057300	Potri.010G202400	ATTBP2,TRFL9	TRF-like 9
Conserved	ptc-miR156j	Potri.008G181200	Potri.010G093700;Potri.010G052800	0	Leucine-rich repeat protein kinase family protein
Conserved	ptc-miR156j	Potri.012G113700	Potri.015G111200	0	Mitochondrial import inner membrane translocase subunit Tim17/Tim22/Tim23 family protein
Conserved	ptc-miR156j	Potri.013G136100	Potri.019G102800	EPF1	epidermal patterning factor 1
Conserved	ptc-miR156j	Potri.002G135000	Potri.014G043500	0	Haloacid dehalogenase-like hydrolase (HAD) superfamily protein
Conserved	ptc-miR156j	Potri.008G000300	Potri.010G241000	ATCAT6,CAT6	cationic amino acid transporter 6
Conserved	ptc-miR156j	Potri.004G055000	Potri.011G065100	TBL38	TRICHOME BIREFRINGENCE-LIKE 38
Conserved	ptc-miR156j	Potri.015G133100	Potri.012G131300	AAT1,CAT1	amino acid transporter 1
Conserved	ptc-miR156j	Potri.003G115100	Potri.001G075000;Potri.001G117800	0	Leucine-rich repeat protein kinase family protein
Conserved	ptc-miR156j	Potri.010G058200	Potri.008G176900	0	Leucine-rich repeat protein kinase family protein
Conserved	ptc-miR156j	Potri.017G015300	Potri.017G015600;;Potri.017G015500	0	LRR and NB-ARC domains-containing disease resistance protein
Conserved	ptc-miR156j	Potri.017G015200	Potri.017G015500	0	LRR and NB-ARC domains-containing disease resistance protein
Conserved	ptc-miR156j	Potri.018G139300	Potri.006G072400	ATWRKY11,WRKY11	WRKY DNA-binding protein 11
Conserved	ptc-miR159a	Potri.019G083700	Potri.013G113100	0	DNAJ heat shock N-terminal domain-containing protein
Conserved	ptc-miR159a	Potri.016G138600	Potri.006G109900	0	Glycosyl hydrolase superfamily protein
Conserved	ptc-miR159a	Potri.012G007400	Potri.015G004000	ILL3	IAA-leucine-resistant (ILR1)-like 3
Conserved	ptc-miR159a	Potri.004G217800	Potri.003G018500	0	T-complex protein 11
Conserved	ptc-miR159a	Potri.016G008800	Potri.006G016900	0	Uncharacterised protein family (UPF0497)
Conserved	ptc-miR159a	Potri.019G100600	Potri.013G131900	0	0
Conserved	ptc-miR159a	Potri.016G105900	Potri.006G094000	0	RING/FYVE/PHD zinc finger superfamily protein
Conserved	ptc-miR159b	Potri.019G083700	Potri.013G113100	0	DNAJ heat shock N-terminal domain-containing protein
Conserved	ptc-miR159b	Potri.016G138600	Potri.006G109900	0	Glycosyl hydrolase superfamily protein
Conserved	ptc-miR159b	Potri.012G007400	Potri.015G004000	ILL3	IAA-leucine-resistant (ILR1)-like 3
Conserved	ptc-miR159b	Potri.004G217800	Potri.003G018500	0	T-complex protein 11
Conserved	ptc-miR159b	Potri.016G008800	Potri.006G016900	0	Uncharacterised protein family (UPF0497)
Conserved	ptc-miR159b	Potri.019G100600	Potri.013G131900	0	0
Conserved	ptc-miR159b	Potri.016G105900	Potri.006G094000	0	RING/FYVE/PHD zinc finger superfamily protein
Conserved	ptc-miR159c	Potri.001G107900	Potri.003G123600	EMB1586,ISE1	P-loop containing nucleoside triphosphate hydrolases superfamily protein
Conserved	ptc-miR159c	Potri.006G034900	Potri.016G032600	0	Homeodomain-like superfamily protein
Conserved	ptc-miR159c	Potri.013G026000	Potri.005G039500	0	NAD(P)-binding Rossmann-fold superfamily protein
Conserved	ptc-miR159c	Potri.014G113500	Potri.002G187400	PGP21	P-glycoprotein 21
Conserved	ptc-miR159c	Potri.018G009000	Potri.006G272600;Potri.006G272500	UGT73B4	UDP-glycosyltransferase 73B4
Conserved	ptc-miR159c	Potri.008G002500	Potri.010G254900	0	Pyruvate kinase family protein
Conserved	ptc-miR159c	Potri.010G192000	Potri.008G065500	AteIF3f,EIF2,eIF3F	eukaryotic translation initiation factor 2
Conserved	ptc-miR159c	Potri.002G185200	Potri.014G110700	ROC4	rotamase CYP 4
Conserved	ptc-miR159c	Potri.008G172800	Potri.010G064600	0	Transducin/WD40 repeat-like superfamily protein
Conserved	ptc-miR159c	Potri.010G064600	Potri.008G172800	0	Transducin/WD40 repeat-like superfamily protein
Conserved	ptc-miR159c	Potri.005G198000	Potri.002G063300	0	Leucine-rich receptor-like protein kinase family protein
Conserved	ptc-miR159c	Potri.005G251800	Potri.002G009600	0	Patched family protein
Conserved	ptc-miR159c	Potri.002G092700	Potri.005G167400	ACC1,AT-ACC1,EMB22,GK,PAS3	acetyl-CoA carboxylase 1
Conserved	ptc-miR159d	Potri.002G032400	Potri.005G230800	0	basic helix-loop-helix (bHLH) DNA-binding superfamily protein
Conserved	ptc-miR159d	Potri.006G097600	Potri.016G112600	SQD2	sulfoquinovosyldiacylglycerol 2
Conserved	ptc-miR159d	Potri.016G112600	Potri.006G097600	SQD2	sulfoquinovosyldiacylglycerol 2
Conserved	ptc-miR159d	Potri.004G038300	Potri.011G046900	0	disease resistance protein (TIR class), putative
Conserved	ptc-miR159d	Potri.005G251800	Potri.002G009600	0	Patched family protein
Conserved	ptc-miR159d	Potri.002G009600	Potri.005G251800	0	Patched family protein
Conserved	ptc-miR159d	Potri.012G034700	Potri.015G025900	EDA28,MEE23	FAD-binding Berberine family protein
Conserved	ptc-miR159d	Potri.001G013800	Potri.003G212300	0	Emsy N Terminus (ENT)/ plant Tudor-like domains-containing protein
Conserved	ptc-miR160a	Potri.010G102900	Potri.008G137900	AHK4,ATCRE1,CRE1,WOL,WOL1	CHASE domain containing histidine kinase protein
Conserved	ptc-miR160a	Potri.008G137900	Potri.010G102900	AHK4,ATCRE1,CRE1,WOL,WOL1	CHASE domain containing histidine kinase protein
Conserved	ptc-miR160d	Potri.010G102900	Potri.008G137900	AHK4,ATCRE1,CRE1,WOL,WOL1	CHASE domain containing histidine kinase protein
Conserved	ptc-miR160d	Potri.008G137900	Potri.010G102900	AHK4,ATCRE1,CRE1,WOL,WOL1	CHASE domain containing histidine kinase protein
Conserved	ptc-miR162a	Potri.014G110500	Potri.002G185000	POL	Protein phosphatase 2C family protein
Conserved	ptc-miR162a	Potri.016G074900	Potri.006G208300	0	LETM1-like protein
Conserved	ptc-miR162a	Potri.003G006300	Potri.004G224400	cpHsc70-2,CPHSC70-2EAT SHOCK PROTEIN 70-2,HSC70-7	chloroplast heat shock protein 70-2
Conserved	ptc-miR162a	Potri.004G224400	Potri.003G006300	cpHsc70-2,CPHSC70-2EAT SHOCK PROTEIN 70-2,HSC70-7	chloroplast heat shock protein 70-2
Conserved	ptc-miR162b	Potri.014G110500	Potri.002G185000	POL	Protein phosphatase 2C family protein
Conserved	ptc-miR162b	Potri.016G074900	Potri.006G208300	0	LETM1-like protein
Conserved	ptc-miR162b	Potri.003G006300	Potri.004G224400	cpHsc70-2,CPHSC70-2EAT SHOCK PROTEIN 70-2,HSC70-7	chloroplast heat shock protein 70-2
Conserved	ptc-miR162b	Potri.004G224400	Potri.003G006300	cpHsc70-2,CPHSC70-2EAT SHOCK PROTEIN 70-2,HSC70-7	chloroplast heat shock protein 70-2
Conserved	ptc-miR164a	Potri.012G069700	Potri.015G063400	ATATH6,ATH6	ABC2 homolog 6
Conserved	ptc-miR164a	Potri.010G026200	Potri.008G197000	ATSPL7,SPL7	squamosa promoter binding protein-like 7
Conserved	ptc-miR164a	Potri.019G035600	Potri.013G057200	0	0
Conserved	ptc-miR164a	Potri.014G162800	Potri.002G223100	0	0
Conserved	ptc-miR164a	Potri.006G214000	Potri.016G080500	ATUXS1,UXS1	UDP-glucuronic acid decarboxylase 1
Conserved	ptc-miR164a	Potri.008G053100	Potri.010G207200	UXS6	UDP-XYL synthase 6
Conserved	ptc-miR164a	Potri.011G119600	Potri.001G399500	0	Core-2/I-branching beta-1,6-N-acetylglucosaminyltransferase family protein
Conserved	ptc-miR164a	Potri.001G399500	Potri.011G119600	0	Core-2/I-branching beta-1,6-N-acetylglucosaminyltransferase family protein
Conserved	ptc-miR164b	Potri.012G069700	Potri.015G063400	ATATH6,ATH6	ABC2 homolog 6
Conserved	ptc-miR164b	Potri.010G026200	Potri.008G197000	ATSPL7,SPL7	squamosa promoter binding protein-like 7
Conserved	ptc-miR164b	Potri.019G035600	Potri.013G057200	0	0
Conserved	ptc-miR164b	Potri.014G162800	Potri.002G223100	0	0
Conserved	ptc-miR164b	Potri.006G214000	Potri.016G080500	ATUXS1,UXS1	UDP-glucuronic acid decarboxylase 1
Conserved	ptc-miR164b	Potri.008G053100	Potri.010G207200	UXS6	UDP-XYL synthase 6
Conserved	ptc-miR164b	Potri.011G119600	Potri.001G399500	0	Core-2/I-branching beta-1,6-N-acetylglucosaminyltransferase family protein
Conserved	ptc-miR164b	Potri.001G399500	Potri.011G119600	0	Core-2/I-branching beta-1,6-N-acetylglucosaminyltransferase family protein
Conserved	ptc-miR164c	Potri.012G069700	Potri.015G063400	ATATH6,ATH6	ABC2 homolog 6
Conserved	ptc-miR164c	Potri.010G026200	Potri.008G197000	ATSPL7,SPL7	squamosa promoter binding protein-like 7
Conserved	ptc-miR164c	Potri.019G035600	Potri.013G057200	0	0
Conserved	ptc-miR164c	Potri.014G162800	Potri.002G223100	0	0
Conserved	ptc-miR164c	Potri.006G214000	Potri.016G080500	ATUXS1,UXS1	UDP-glucuronic acid decarboxylase 1
Conserved	ptc-miR164c	Potri.008G053100	Potri.010G207200	UXS6	UDP-XYL synthase 6
Conserved	ptc-miR164c	Potri.011G119600	Potri.001G399500	0	Core-2/I-branching beta-1,6-N-acetylglucosaminyltransferase family protein
Conserved	ptc-miR164c	Potri.001G399500	Potri.011G119600	0	Core-2/I-branching beta-1,6-N-acetylglucosaminyltransferase family protein
Conserved	ptc-miR164d	Potri.012G069700	Potri.015G063400	ATATH6,ATH6	ABC2 homolog 6
Conserved	ptc-miR164d	Potri.010G026200	Potri.008G197000	ATSPL7,SPL7	squamosa promoter binding protein-like 7
Conserved	ptc-miR164d	Potri.019G035600	Potri.013G057200	0	0
Conserved	ptc-miR164d	Potri.014G162800	Potri.002G223100	0	0
Conserved	ptc-miR164d	Potri.006G214000	Potri.016G080500	ATUXS1,UXS1	UDP-glucuronic acid decarboxylase 1
Conserved	ptc-miR164d	Potri.008G053100	Potri.010G207200	UXS6	UDP-XYL synthase 6
Conserved	ptc-miR164d	Potri.011G119600	Potri.001G399500	0	Core-2/I-branching beta-1,6-N-acetylglucosaminyltransferase family protein
Conserved	ptc-miR164d	Potri.001G399500	Potri.011G119600	0	Core-2/I-branching beta-1,6-N-acetylglucosaminyltransferase family protein
Conserved	ptc-miR166a	Potri.007G119200	Potri.017G041300	0	eukaryotic translation initiation factor-related
Conserved	ptc-miR166a	Potri.001G070100	Potri.003G160600	0	DHHC-type zinc finger family protein
Conserved	ptc-miR166a	Potri.T169600	Potri.008G146200	0	RNA-processing, Lsm domain
Conserved	ptc-miR166a	Potri.001G117000	Potri.003G115700	0	0
Conserved	ptc-miR166a	Potri.003G115700	Potri.001G117000	0	0
Conserved	ptc-miR166a	Potri.002G195100	Potri.014G119600	0	HIT zinc finger ;PAPA-1-like conserved region
Conserved	ptc-miR166a	Potri.009G043200	Potri.001G249200	PY,THIC	thiaminC
Conserved	ptc-miR166b	Potri.007G119200	Potri.017G041300	0	eukaryotic translation initiation factor-related
Conserved	ptc-miR166b	Potri.001G070100	Potri.003G160600	0	DHHC-type zinc finger family protein
Conserved	ptc-miR166b	Potri.T169600	Potri.008G146200	0	RNA-processing, Lsm domain
Conserved	ptc-miR166b	Potri.001G117000	Potri.003G115700	0	0
Conserved	ptc-miR166b	Potri.003G115700	Potri.001G117000	0	0
Conserved	ptc-miR166b	Potri.002G195100	Potri.014G119600	0	HIT zinc finger ;PAPA-1-like conserved region
Conserved	ptc-miR166b	Potri.009G043200	Potri.001G249200	PY,THIC	thiaminC
Conserved	ptc-miR166c	Potri.007G119200	Potri.017G041300	0	eukaryotic translation initiation factor-related
Conserved	ptc-miR166c	Potri.001G070100	Potri.003G160600	0	DHHC-type zinc finger family protein
Conserved	ptc-miR166c	Potri.T169600	Potri.008G146200	0	RNA-processing, Lsm domain
Conserved	ptc-miR166c	Potri.001G117000	Potri.003G115700	0	0
Conserved	ptc-miR166c	Potri.003G115700	Potri.001G117000	0	0
Conserved	ptc-miR166c	Potri.002G195100	Potri.014G119600	0	HIT zinc finger ;PAPA-1-like conserved region
Conserved	ptc-miR166c	Potri.009G043200	Potri.001G249200	PY,THIC	thiaminC
Conserved	ptc-miR166d	Potri.007G119200	Potri.017G041300	0	eukaryotic translation initiation factor-related
Conserved	ptc-miR166d	Potri.001G070100	Potri.003G160600	0	DHHC-type zinc finger family protein
Conserved	ptc-miR166d	Potri.T169600	Potri.008G146200	0	RNA-processing, Lsm domain
Conserved	ptc-miR166d	Potri.001G117000	Potri.003G115700	0	0
Conserved	ptc-miR166d	Potri.003G115700	Potri.001G117000	0	0
Conserved	ptc-miR166d	Potri.002G195100	Potri.014G119600	0	HIT zinc finger ;PAPA-1-like conserved region
Conserved	ptc-miR166d	Potri.009G043200	Potri.001G249200	PY,THIC	thiaminC
Conserved	ptc-miR166e	Potri.007G119200	Potri.017G041300	0	eukaryotic translation initiation factor-related
Conserved	ptc-miR166e	Potri.001G070100	Potri.003G160600	0	DHHC-type zinc finger family protein
Conserved	ptc-miR166e	Potri.T169600	Potri.008G146200	0	RNA-processing, Lsm domain
Conserved	ptc-miR166e	Potri.001G117000	Potri.003G115700	0	0
Conserved	ptc-miR166e	Potri.003G115700	Potri.001G117000	0	0
Conserved	ptc-miR166e	Potri.002G195100	Potri.014G119600	0	HIT zinc finger ;PAPA-1-like conserved region
Conserved	ptc-miR166e	Potri.009G043200	Potri.001G249200	PY,THIC	thiaminC
Conserved	ptc-miR166f	Potri.007G119200	Potri.017G041300	0	eukaryotic translation initiation factor-related
Conserved	ptc-miR166f	Potri.001G070100	Potri.003G160600	0	DHHC-type zinc finger family protein
Conserved	ptc-miR166f	Potri.T169600	Potri.008G146200	0	RNA-processing, Lsm domain
Conserved	ptc-miR166f	Potri.001G117000	Potri.003G115700	0	0
Conserved	ptc-miR166f	Potri.003G115700	Potri.001G117000	0	0
Conserved	ptc-miR166f	Potri.002G195100	Potri.014G119600	0	HIT zinc finger ;PAPA-1-like conserved region
Conserved	ptc-miR166f	Potri.009G043200	Potri.001G249200	PY,THIC	thiaminC
Conserved	ptc-miR166g	Potri.007G119200	Potri.017G041300	0	eukaryotic translation initiation factor-related
Conserved	ptc-miR166g	Potri.001G070100	Potri.003G160600	0	DHHC-type zinc finger family protein
Conserved	ptc-miR166g	Potri.T169600	Potri.008G146200	0	RNA-processing, Lsm domain
Conserved	ptc-miR166g	Potri.001G117000	Potri.003G115700	0	0
Conserved	ptc-miR166g	Potri.003G115700	Potri.001G117000	0	0
Conserved	ptc-miR166g	Potri.002G195100	Potri.014G119600	0	HIT zinc finger ;PAPA-1-like conserved region
Conserved	ptc-miR166g	Potri.009G043200	Potri.001G249200	PY,THIC	thiaminC
Conserved	ptc-miR166h	Potri.007G119200	Potri.017G041300	0	eukaryotic translation initiation factor-related
Conserved	ptc-miR166h	Potri.001G070100	Potri.003G160600	0	DHHC-type zinc finger family protein
Conserved	ptc-miR166h	Potri.T169600	Potri.008G146200	0	RNA-processing, Lsm domain
Conserved	ptc-miR166h	Potri.001G117000	Potri.003G115700	0	0
Conserved	ptc-miR166h	Potri.003G115700	Potri.001G117000	0	0
Conserved	ptc-miR166h	Potri.002G195100	Potri.014G119600	0	HIT zinc finger ;PAPA-1-like conserved region
Conserved	ptc-miR166h	Potri.009G043200	Potri.001G249200	PY,THIC	thiaminC
Conserved	ptc-miR166i	Potri.007G119200	Potri.017G041300	0	eukaryotic translation initiation factor-related
Conserved	ptc-miR166i	Potri.001G070100	Potri.003G160600	0	DHHC-type zinc finger family protein
Conserved	ptc-miR166i	Potri.T169600	Potri.008G146200	0	RNA-processing, Lsm domain
Conserved	ptc-miR166i	Potri.001G117000	Potri.003G115700	0	0
Conserved	ptc-miR166i	Potri.003G115700	Potri.001G117000	0	0
Conserved	ptc-miR166i	Potri.002G195100	Potri.014G119600	0	HIT zinc finger ;PAPA-1-like conserved region
Conserved	ptc-miR166i	Potri.009G043200	Potri.001G249200	PY,THIC	thiaminC
Conserved	ptc-miR166j	Potri.007G119200	Potri.017G041300	0	eukaryotic translation initiation factor-related
Conserved	ptc-miR166j	Potri.001G070100	Potri.003G160600	0	DHHC-type zinc finger family protein
Conserved	ptc-miR166j	Potri.T169600	Potri.008G146200	0	RNA-processing, Lsm domain
Conserved	ptc-miR166j	Potri.001G117000	Potri.003G115700	0	0
Conserved	ptc-miR166j	Potri.003G115700	Potri.001G117000	0	0
Conserved	ptc-miR166j	Potri.002G195100	Potri.014G119600	0	HIT zinc finger ;PAPA-1-like conserved region
Conserved	ptc-miR166j	Potri.009G043200	Potri.001G249200	PY,THIC	thiaminC
Conserved	ptc-miR166k	Potri.007G119200	Potri.017G041300	0	eukaryotic translation initiation factor-related
Conserved	ptc-miR166k	Potri.001G070100	Potri.003G160600	0	DHHC-type zinc finger family protein
Conserved	ptc-miR166k	Potri.T169600	Potri.008G146200	0	RNA-processing, Lsm domain
Conserved	ptc-miR166k	Potri.001G117000	Potri.003G115700	0	0
Conserved	ptc-miR166k	Potri.003G115700	Potri.001G117000	0	0
Conserved	ptc-miR166k	Potri.002G195100	Potri.014G119600	0	HIT zinc finger ;PAPA-1-like conserved region
Conserved	ptc-miR166k	Potri.009G043200	Potri.001G249200	PY,THIC	thiaminC
Conserved	ptc-miR166l	Potri.007G119200	Potri.017G041300	0	eukaryotic translation initiation factor-related
Conserved	ptc-miR166l	Potri.001G070100	Potri.003G160600	0	DHHC-type zinc finger family protein
Conserved	ptc-miR166l	Potri.T169600	Potri.008G146200	0	RNA-processing, Lsm domain
Conserved	ptc-miR166l	Potri.001G117000	Potri.003G115700	0	0
Conserved	ptc-miR166l	Potri.003G115700	Potri.001G117000	0	0
Conserved	ptc-miR166l	Potri.002G195100	Potri.014G119600	0	HIT zinc finger ;PAPA-1-like conserved region
Conserved	ptc-miR166l	Potri.009G043200	Potri.001G249200	PY,THIC	thiaminC
Conserved	ptc-miR166m	Potri.007G119200	Potri.017G041300	0	eukaryotic translation initiation factor-related
Conserved	ptc-miR166m	Potri.001G070100	Potri.003G160600	0	DHHC-type zinc finger family protein
Conserved	ptc-miR166m	Potri.T169600	Potri.008G146200	0	RNA-processing, Lsm domain
Conserved	ptc-miR166m	Potri.001G117000	Potri.003G115700	0	0
Conserved	ptc-miR166m	Potri.003G115700	Potri.001G117000	0	0
Conserved	ptc-miR166m	Potri.002G195100	Potri.014G119600	0	HIT zinc finger ;PAPA-1-like conserved region
Conserved	ptc-miR166m	Potri.009G043200	Potri.001G249200	PY,THIC	thiaminC
Conserved	ptc-miR166p	Potri.007G102100	Potri.005G067200	AIR3	Subtilisin-like serine endopeptidase family protein
Conserved	ptc-miR166p	Potri.004G048700	Potri.011G057700	HB-1	homeobox-1
Conserved	ptc-miR166q	Potri.002G195100	Potri.014G119600	0	HIT zinc finger ;PAPA-1-like conserved region
Conserved	ptc-miR166q	Potri.007G119200	Potri.017G041300	0	eukaryotic translation initiation factor-related
Conserved	ptc-miR166q	Potri.001G070100	Potri.003G160600	0	DHHC-type zinc finger family protein
Conserved	ptc-miR167a	Potri.004G078200	Potri.017G141000	ARF8,ATARF8	auxin response factor 8
Conserved	ptc-miR167a	Potri.002G055000	Potri.005G207500	ARF8,ATARF8	auxin response factor 8
Conserved	ptc-miR167a	Potri.017G141000	Potri.004G078200	ARF8,ATARF8	auxin response factor 8
Conserved	ptc-miR167a	Potri.001G358500	Potri.011G091900	ARF8,ATARF8	auxin response factor 8
Conserved	ptc-miR167a	Potri.011G091900	Potri.001G358500	ARF8,ATARF8	auxin response factor 8
Conserved	ptc-miR167a	Potri.004G207500	Potri.009G168600	0	0
Conserved	ptc-miR167a	Potri.003G094500	Potri.001G139500	ATTPS5,TPS5	trehalose phosphatase/synthase 5
Conserved	ptc-miR167a	Potri.010G100600	Potri.008G141000	0	Bifunctional inhibitor/lipid-transfer protein/seed storage 2S albumin superfamily protein
Conserved	ptc-miR167a	Potri.015G030400	Potri.012G038300	EPR1,RVE7	Homeodomain-like superfamily protein
Conserved	ptc-miR167a	Potri.006G024100	Potri.016G023100	ATRH53,PMH2	putative mitochondrial RNA helicase 2
Conserved	ptc-miR167a	Potri.010G220100	Potri.008G041700	SCPL27	serine carboxypeptidase-like 27
Conserved	ptc-miR167a	Potri.012G126800	Potri.015G127700	0	Plant invertase/pectin methylesterase inhibitor superfamily
Conserved	ptc-miR167a	Potri.003G161000	Potri.001G069300	0	Integrase-type DNA-binding superfamily protein
Conserved	ptc-miR167a	Potri.006G130700	Potri.016G086700	0	Phosphatidic acid phosphatase (PAP2) family protein
Conserved	ptc-miR167a	Potri.009G136700	Potri.004G176400	0	Protein of unknown function (DUF1624)
Conserved	ptc-miR167a	Potri.017G016200	Potri.007G135500	0	Homeodomain-like transcriptional regulator
Conserved	ptc-miR167b	Potri.004G078200	Potri.017G141000	ARF8,ATARF8	auxin response factor 8
Conserved	ptc-miR167b	Potri.002G055000	Potri.005G207500	ARF8,ATARF8	auxin response factor 8
Conserved	ptc-miR167b	Potri.017G141000	Potri.004G078200	ARF8,ATARF8	auxin response factor 8
Conserved	ptc-miR167b	Potri.001G358500	Potri.011G091900	ARF8,ATARF8	auxin response factor 8
Conserved	ptc-miR167b	Potri.011G091900	Potri.001G358500	ARF8,ATARF8	auxin response factor 8
Conserved	ptc-miR167b	Potri.004G207500	Potri.009G168600	0	0
Conserved	ptc-miR167b	Potri.003G094500	Potri.001G139500	ATTPS5,TPS5	trehalose phosphatase/synthase 5
Conserved	ptc-miR167b	Potri.010G100600	Potri.008G141000	0	Bifunctional inhibitor/lipid-transfer protein/seed storage 2S albumin superfamily protein
Conserved	ptc-miR167b	Potri.015G030400	Potri.012G038300	EPR1,RVE7	Homeodomain-like superfamily protein
Conserved	ptc-miR167b	Potri.006G024100	Potri.016G023100	ATRH53,PMH2	putative mitochondrial RNA helicase 2
Conserved	ptc-miR167b	Potri.010G220100	Potri.008G041700	SCPL27	serine carboxypeptidase-like 27
Conserved	ptc-miR167b	Potri.012G126800	Potri.015G127700	0	Plant invertase/pectin methylesterase inhibitor superfamily
Conserved	ptc-miR167b	Potri.003G161000	Potri.001G069300	0	Integrase-type DNA-binding superfamily protein
Conserved	ptc-miR167b	Potri.006G130700	Potri.016G086700	0	Phosphatidic acid phosphatase (PAP2) family protein
Conserved	ptc-miR167b	Potri.009G136700	Potri.004G176400	0	Protein of unknown function (DUF1624)
Conserved	ptc-miR167b	Potri.017G016200	Potri.007G135500	0	Homeodomain-like transcriptional regulator
Conserved	ptc-miR167c	Potri.004G078200	Potri.017G141000	ARF8,ATARF8	auxin response factor 8
Conserved	ptc-miR167c	Potri.002G055000	Potri.005G207500	ARF8,ATARF8	auxin response factor 8
Conserved	ptc-miR167c	Potri.017G141000	Potri.004G078200	ARF8,ATARF8	auxin response factor 8
Conserved	ptc-miR167c	Potri.001G358500	Potri.011G091900	ARF8,ATARF8	auxin response factor 8
Conserved	ptc-miR167c	Potri.011G091900	Potri.001G358500	ARF8,ATARF8	auxin response factor 8
Conserved	ptc-miR167c	Potri.004G207500	Potri.009G168600	0	0
Conserved	ptc-miR167c	Potri.003G094500	Potri.001G139500	ATTPS5,TPS5	trehalose phosphatase/synthase 5
Conserved	ptc-miR167c	Potri.010G100600	Potri.008G141000	0	Bifunctional inhibitor/lipid-transfer protein/seed storage 2S albumin superfamily protein
Conserved	ptc-miR167c	Potri.015G030400	Potri.012G038300	EPR1,RVE7	Homeodomain-like superfamily protein
Conserved	ptc-miR167c	Potri.006G024100	Potri.016G023100	ATRH53,PMH2	putative mitochondrial RNA helicase 2
Conserved	ptc-miR167c	Potri.010G220100	Potri.008G041700	SCPL27	serine carboxypeptidase-like 27
Conserved	ptc-miR167c	Potri.012G126800	Potri.015G127700	0	Plant invertase/pectin methylesterase inhibitor superfamily
Conserved	ptc-miR167c	Potri.003G161000	Potri.001G069300	0	Integrase-type DNA-binding superfamily protein
Conserved	ptc-miR167c	Potri.006G130700	Potri.016G086700	0	Phosphatidic acid phosphatase (PAP2) family protein
Conserved	ptc-miR167c	Potri.009G136700	Potri.004G176400	0	Protein of unknown function (DUF1624)
Conserved	ptc-miR167c	Potri.017G016200	Potri.007G135500	0	Homeodomain-like transcriptional regulator
Conserved	ptc-miR167d	Potri.004G078200	Potri.017G141000	ARF8,ATARF8	auxin response factor 8
Conserved	ptc-miR167d	Potri.002G055000	Potri.005G207500	ARF8,ATARF8	auxin response factor 8
Conserved	ptc-miR167d	Potri.017G141000	Potri.004G078200	ARF8,ATARF8	auxin response factor 8
Conserved	ptc-miR167d	Potri.001G358500	Potri.011G091900	ARF8,ATARF8	auxin response factor 8
Conserved	ptc-miR167d	Potri.011G091900	Potri.001G358500	ARF8,ATARF8	auxin response factor 8
Conserved	ptc-miR167d	Potri.004G207500	Potri.009G168600	0	0
Conserved	ptc-miR167d	Potri.003G094500	Potri.001G139500	ATTPS5,TPS5	trehalose phosphatase/synthase 5
Conserved	ptc-miR167d	Potri.010G100600	Potri.008G141000	0	Bifunctional inhibitor/lipid-transfer protein/seed storage 2S albumin superfamily protein
Conserved	ptc-miR167d	Potri.015G030400	Potri.012G038300	EPR1,RVE7	Homeodomain-like superfamily protein
Conserved	ptc-miR167d	Potri.006G024100	Potri.016G023100	ATRH53,PMH2	putative mitochondrial RNA helicase 2
Conserved	ptc-miR167d	Potri.010G220100	Potri.008G041700	SCPL27	serine carboxypeptidase-like 27
Conserved	ptc-miR167d	Potri.012G126800	Potri.015G127700	0	Plant invertase/pectin methylesterase inhibitor superfamily
Conserved	ptc-miR167d	Potri.003G161000	Potri.001G069300	0	Integrase-type DNA-binding superfamily protein
Conserved	ptc-miR167d	Potri.006G130700	Potri.016G086700	0	Phosphatidic acid phosphatase (PAP2) family protein
Conserved	ptc-miR167d	Potri.009G136700	Potri.004G176400	0	Protein of unknown function (DUF1624)
Conserved	ptc-miR167d	Potri.017G016200	Potri.007G135500	0	Homeodomain-like transcriptional regulator
Conserved	ptc-miR167f	Potri.004G078200	Potri.017G141000	ARF8,ATARF8	auxin response factor 8
Conserved	ptc-miR167f	Potri.002G055000	Potri.005G207500	ARF8,ATARF8	auxin response factor 8
Conserved	ptc-miR167f	Potri.017G141000	Potri.004G078200	ARF8,ATARF8	auxin response factor 8
Conserved	ptc-miR167f	Potri.001G358500	Potri.011G091900	ARF8,ATARF8	auxin response factor 8
Conserved	ptc-miR167f	Potri.011G091900	Potri.001G358500	ARF8,ATARF8	auxin response factor 8
Conserved	ptc-miR167f	Potri.004G207500	Potri.009G168600	0	0
Conserved	ptc-miR167f	Potri.003G094500	Potri.001G139500	ATTPS5,TPS5	trehalose phosphatase/synthase 5
Conserved	ptc-miR167f	Potri.010G100600	Potri.008G141000	0	Bifunctional inhibitor/lipid-transfer protein/seed storage 2S albumin superfamily protein
Conserved	ptc-miR167f	Potri.015G030400	Potri.012G038300	EPR1,RVE7	Homeodomain-like superfamily protein
Conserved	ptc-miR167f	Potri.006G024100	Potri.016G023100	ATRH53,PMH2	putative mitochondrial RNA helicase 2
Conserved	ptc-miR167f	Potri.010G220100	Potri.008G041700	SCPL27	serine carboxypeptidase-like 27
Conserved	ptc-miR167f	Potri.012G126800	Potri.015G127700	0	Plant invertase/pectin methylesterase inhibitor superfamily
Conserved	ptc-miR167f	Potri.003G161000	Potri.001G069300	0	Integrase-type DNA-binding superfamily protein
Conserved	ptc-miR167f	Potri.006G130700	Potri.016G086700	0	Phosphatidic acid phosphatase (PAP2) family protein
Conserved	ptc-miR167f	Potri.009G136700	Potri.004G176400	0	Protein of unknown function (DUF1624)
Conserved	ptc-miR167f	Potri.017G016200	Potri.007G135500	0	Homeodomain-like transcriptional regulator
Conserved	ptc-miR167g	Potri.004G078200	Potri.017G141000	ARF8,ATARF8	auxin response factor 8
Conserved	ptc-miR167g	Potri.002G055000	Potri.005G207500	ARF8,ATARF8	auxin response factor 8
Conserved	ptc-miR167g	Potri.017G141000	Potri.004G078200	ARF8,ATARF8	auxin response factor 8
Conserved	ptc-miR167g	Potri.001G358500	Potri.011G091900	ARF8,ATARF8	auxin response factor 8
Conserved	ptc-miR167g	Potri.011G091900	Potri.001G358500	ARF8,ATARF8	auxin response factor 8
Conserved	ptc-miR167g	Potri.004G207500	Potri.009G168600	0	0
Conserved	ptc-miR167g	Potri.003G094500	Potri.001G139500	ATTPS5,TPS5	trehalose phosphatase/synthase 5
Conserved	ptc-miR167g	Potri.010G100600	Potri.008G141000	0	Bifunctional inhibitor/lipid-transfer protein/seed storage 2S albumin superfamily protein
Conserved	ptc-miR167g	Potri.015G030400	Potri.012G038300	EPR1,RVE7	Homeodomain-like superfamily protein
Conserved	ptc-miR167g	Potri.006G024100	Potri.016G023100	ATRH53,PMH2	putative mitochondrial RNA helicase 2
Conserved	ptc-miR167g	Potri.010G220100	Potri.008G041700	SCPL27	serine carboxypeptidase-like 27
Conserved	ptc-miR167g	Potri.012G126800	Potri.015G127700	0	Plant invertase/pectin methylesterase inhibitor superfamily
Conserved	ptc-miR167g	Potri.003G161000	Potri.001G069300	0	Integrase-type DNA-binding superfamily protein
Conserved	ptc-miR167g	Potri.006G130700	Potri.016G086700	0	Phosphatidic acid phosphatase (PAP2) family protein
Conserved	ptc-miR167g	Potri.009G136700	Potri.004G176400	0	Protein of unknown function (DUF1624)
Conserved	ptc-miR167g	Potri.017G016200	Potri.007G135500	0	Homeodomain-like transcriptional regulator
Conserved	ptc-miR167h	Potri.003G117300	Potri.001G114700	0	Sodium Bile acid symporter family
Conserved	ptc-miR167h	Potri.003G071200	Potri.001G164000	RPSAb	40s ribosomal protein SA B
Conserved	ptc-miR167h	Potri.012G032200	Potri.015G022900	PDV1	plastid division1
Conserved	ptc-miR167h	Potri.001G164000	Potri.003G071200	AP40,P40,RP40,RPSAA	40s ribosomal protein SA
Conserved	ptc-miR167h	Potri.019G057700	Potri.013G091300	0	RING/U-box superfamily protein
Conserved	ptc-miR167h	Potri.004G078200	Potri.017G141000	ARF8,ATARF8	auxin response factor 8
Conserved	ptc-miR167h	Potri.017G141000	Potri.004G078200	ARF8,ATARF8	auxin response factor 8
Conserved	ptc-miR167h	Potri.009G075900	Potri.001G280700	0	Protein kinase superfamily protein
Conserved	ptc-miR169aa	Potri.006G132100	Potri.016G084900	0	Leucine-rich repeat protein kinase family protein
Conserved	ptc-miR169aa	Potri.004G013500	Potri.011G004500	0	Ankyrin repeat family protein
Conserved	ptc-miR169aa	Potri.007G019500	Potri.005G119100	0	Transducin/WD40 repeat-like superfamily protein
Conserved	ptc-miR169aa	Potri.009G002200	Potri.001G212900;	0	Serine carboxypeptidase S28 family protein
Conserved	ptc-miR169ac	Potri.018G054900	Potri.006G230800	NDL2	N-MYC downregulated-like 2
Conserved	ptc-miR169ac	Potri.003G062100	Potri.001G172300	0	Disease resistance protein (CC-NBS-LRR class) family
Conserved	ptc-miR169ac	Potri.004G188600	Potri.009G149200	0	0
Conserved	ptc-miR169ac	Potri.012G098500	Potri.015G097400	NF-YC4	nuclear factor Y, subunit C4
Conserved	ptc-miR169ac	Potri.015G097400	Potri.012G098500	NF-YC4	nuclear factor Y, subunit C4
Conserved	ptc-miR169ad	Potri.018G054900	Potri.006G230800	NDL2	N-MYC downregulated-like 2
Conserved	ptc-miR169ad	Potri.003G062100	Potri.001G172300	0	Disease resistance protein (CC-NBS-LRR class) family
Conserved	ptc-miR169ad	Potri.004G188600	Potri.009G149200	0	0
Conserved	ptc-miR169ad	Potri.012G098500	Potri.015G097400	NF-YC4	nuclear factor Y, subunit C4
Conserved	ptc-miR169ad	Potri.015G097400	Potri.012G098500	NF-YC4	nuclear factor Y, subunit C4
Conserved	ptc-miR169ae	Potri.018G054900	Potri.006G230800	NDL2	N-MYC downregulated-like 2
Conserved	ptc-miR169ae	Potri.003G062100	Potri.001G172300	0	Disease resistance protein (CC-NBS-LRR class) family
Conserved	ptc-miR169ae	Potri.004G188600	Potri.009G149200	0	0
Conserved	ptc-miR169ae	Potri.012G098500	Potri.015G097400	NF-YC4	nuclear factor Y, subunit C4
Conserved	ptc-miR169ae	Potri.015G097400	Potri.012G098500	NF-YC4	nuclear factor Y, subunit C4
Conserved	ptc-miR169af	Potri.018G054900	Potri.006G230800	NDL2	N-MYC downregulated-like 2
Conserved	ptc-miR169af	Potri.003G062100	Potri.001G172300	0	Disease resistance protein (CC-NBS-LRR class) family
Conserved	ptc-miR169af	Potri.004G188600	Potri.009G149200	0	0
Conserved	ptc-miR169af	Potri.012G098500	Potri.015G097400	NF-YC4	nuclear factor Y, subunit C4
Conserved	ptc-miR169af	Potri.015G097400	Potri.012G098500	NF-YC4	nuclear factor Y, subunit C4
Conserved	ptc-miR169i	Potri.010G216000	Potri.008G045700	0	hydrolase family protein / HAD-superfamily protein
Conserved	ptc-miR169i	Potri.014G068600	Potri.002G146800	0	Ribosomal protein S13/S15
Conserved	ptc-miR169i	Potri.018G036200	Potri.006G244300	ATGLB3,GLB3	hemoglobin 3
Conserved	ptc-miR169i	Potri.014G109600	Potri.002G184000	0	0
Conserved	ptc-miR169i	Potri.003G140800	Potri.001G090800	0	Pentatricopeptide repeat (PPR) superfamily protein
Conserved	ptc-miR169j	Potri.010G216000	Potri.008G045700	0	hydrolase family protein / HAD-superfamily protein
Conserved	ptc-miR169j	Potri.014G068600	Potri.002G146800	0	Ribosomal protein S13/S15
Conserved	ptc-miR169j	Potri.018G036200	Potri.006G244300	ATGLB3,GLB3	hemoglobin 3
Conserved	ptc-miR169j	Potri.014G109600	Potri.002G184000	0	0
Conserved	ptc-miR169j	Potri.003G140800	Potri.001G090800	0	Pentatricopeptide repeat (PPR) superfamily protein
Conserved	ptc-miR169k	Potri.010G216000	Potri.008G045700	0	hydrolase family protein / HAD-superfamily protein
Conserved	ptc-miR169k	Potri.014G068600	Potri.002G146800	0	Ribosomal protein S13/S15
Conserved	ptc-miR169k	Potri.018G036200	Potri.006G244300	ATGLB3,GLB3	hemoglobin 3
Conserved	ptc-miR169k	Potri.014G109600	Potri.002G184000	0	0
Conserved	ptc-miR169k	Potri.003G140800	Potri.001G090800	0	Pentatricopeptide repeat (PPR) superfamily protein
Conserved	ptc-miR169l	Potri.010G216000	Potri.008G045700	0	hydrolase family protein / HAD-superfamily protein
Conserved	ptc-miR169l	Potri.014G068600	Potri.002G146800	0	Ribosomal protein S13/S15
Conserved	ptc-miR169l	Potri.018G036200	Potri.006G244300	ATGLB3,GLB3	hemoglobin 3
Conserved	ptc-miR169l	Potri.014G109600	Potri.002G184000	0	0
Conserved	ptc-miR169l	Potri.003G140800	Potri.001G090800	0	Pentatricopeptide repeat (PPR) superfamily protein
Conserved	ptc-miR169m	Potri.010G216000	Potri.008G045700	0	hydrolase family protein / HAD-superfamily protein
Conserved	ptc-miR169m	Potri.014G068600	Potri.002G146800	0	Ribosomal protein S13/S15
Conserved	ptc-miR169m	Potri.018G036200	Potri.006G244300	ATGLB3,GLB3	hemoglobin 3
Conserved	ptc-miR169m	Potri.014G109600	Potri.002G184000	0	0
Conserved	ptc-miR169m	Potri.003G140800	Potri.001G090800	0	Pentatricopeptide repeat (PPR) superfamily protein
Conserved	ptc-miR169q	Potri.018G054900	Potri.006G230800	NDL2	N-MYC downregulated-like 2
Conserved	ptc-miR169q	Potri.012G098500	Potri.015G097400	NF-YC4	nuclear factor Y, subunit C4
Conserved	ptc-miR169q	Potri.015G097400	Potri.012G098500	NF-YC4	nuclear factor Y, subunit C4
Conserved	ptc-miR169q	Potri.003G062100	Potri.001G172300	0	Disease resistance protein (CC-NBS-LRR class) family
Conserved	ptc-miR169u	Potri.018G054900	Potri.006G230800	NDL2	N-MYC downregulated-like 2
Conserved	ptc-miR169u	Potri.003G062100	Potri.001G172300	0	Disease resistance protein (CC-NBS-LRR class) family
Conserved	ptc-miR169u	Potri.004G188600	Potri.009G149200	0	0
Conserved	ptc-miR169u	Potri.012G098500	Potri.015G097400	NF-YC4	nuclear factor Y, subunit C4
Conserved	ptc-miR169u	Potri.015G097400	Potri.012G098500	NF-YC4	nuclear factor Y, subunit C4
Conserved	ptc-miR171c	Potri.015G046700	Potri.012G056000	ATSYTF,NTMC2T3,NTMC2TYPE3,SYTF	C2 domain-containing protein
Conserved	ptc-miR171c	Potri.013G144100	Potri.019G103100	0	Protein phosphatase 2C family protein
Conserved	ptc-miR171c	Potri.016G091700	Potri.006G125400	TKI1	TSL-kinase interacting protein 1
Conserved	ptc-miR171c	Potri.018G123300	Potri.006G063500	0	Avirulence induced gene (AIG1) family protein
Conserved	ptc-miR171c	Potri.009G069100	Potri.001G274600	CYP75B1,D501,TT7	Cytochrome P450 superfamily protein
Conserved	ptc-miR171c	Potri.005G230600	Potri.002G032500	ATBBD1,BBD1	bifunctional nuclease in basal defense response 1
Conserved	ptc-miR171c	Potri.002G032500	Potri.005G230600	0	Wound-responsive family protein
Conserved	ptc-miR171d	Potri.015G046700	Potri.012G056000	ATSYTF,NTMC2T3,NTMC2TYPE3,SYTF	C2 domain-containing protein
Conserved	ptc-miR171d	Potri.013G144100	Potri.019G103100	0	Protein phosphatase 2C family protein
Conserved	ptc-miR171d	Potri.016G091700	Potri.006G125400	TKI1	TSL-kinase interacting protein 1
Conserved	ptc-miR171d	Potri.018G123300	Potri.006G063500	0	Avirulence induced gene (AIG1) family protein
Conserved	ptc-miR171d	Potri.009G069100	Potri.001G274600	CYP75B1,D501,TT7	Cytochrome P450 superfamily protein
Conserved	ptc-miR171d	Potri.005G230600	Potri.002G032500	ATBBD1,BBD1	bifunctional nuclease in basal defense response 1
Conserved	ptc-miR171d	Potri.002G032500	Potri.005G230600	0	Wound-responsive family protein
Conserved	ptc-miR171i	Potri.019G032800	Potri.013G059800	0	transcription regulator NOT2/NOT3/NOT5 family protein
Conserved	ptc-miR171i	Potri.013G059800	Potri.019G032800;	0	transcription regulator NOT2/NOT3/NOT5 family protein
Conserved	ptc-miR171i	Potri.004G043500	Potri.011G052600	ATUBC24,PHO2,UBC24	phosphate 2
Conserved	ptc-miR171i	Potri.011G052600	Potri.004G043500	ATUBC24,PHO2,UBC24	phosphate 2
Conserved	ptc-miR171i	Potri.005G237600	Potri.002G024000	0	Putative lysine decarboxylase family protein
Conserved	ptc-miR172a	Potri.007G046200	Potri.005G140700	AP2,FL1,FLO2	Integrase-type DNA-binding superfamily protein
Conserved	ptc-miR172a	Potri.005G254000	Potri.002G007200	ATIRE1-1,IRE1-1	inositol requiring 1-1
Conserved	ptc-miR172a	Potri.016G039000	Potri.006G042100	3-Oct,ATOCT3	organic cation/carnitine transporter 3
Conserved	ptc-miR172a	Potri.003G183000	Potri.001G043900	ATCNGC8,CNGC8	cyclic nucleotide gated channel 8
Conserved	ptc-miR172a	Potri.006G175500	Potri.018G097700	ATTPS11,ATTPSB,TPS11	trehalose phosphatase/synthase 11
Conserved	ptc-miR172a	Potri.010G137300	Potri.008G112300	0	DNA glycosylase superfamily protein
Conserved	ptc-miR172a	Potri.015G135600	Potri.012G144900;Potri.012G133500	0	MATE efflux family protein
Conserved	ptc-miR172a	Potri.012G133500	Potri.015G135600;Potri.015G147600	0	MATE efflux family protein
Conserved	ptc-miR172a	Potri.004G089800	Potri.017G125200	RGA,RGA1	GRAS family transcription factor family protein
Conserved	ptc-miR172a	Potri.015G071500	Potri.012G076700	0	Gibberellin-regulated family protein
Conserved	ptc-miR172c	Potri.007G046200	Potri.005G140700	AP2,FL1,FLO2	Integrase-type DNA-binding superfamily protein
Conserved	ptc-miR172c	Potri.005G254000	Potri.002G007200	ATIRE1-1,IRE1-1	inositol requiring 1-1
Conserved	ptc-miR172c	Potri.016G039000	Potri.006G042100	3-Oct,ATOCT3	organic cation/carnitine transporter 3
Conserved	ptc-miR172c	Potri.003G183000	Potri.001G043900	ATCNGC8,CNGC8	cyclic nucleotide gated channel 8
Conserved	ptc-miR172c	Potri.006G175500	Potri.018G097700	ATTPS11,ATTPSB,TPS11	trehalose phosphatase/synthase 11
Conserved	ptc-miR172c	Potri.010G137300	Potri.008G112300	0	DNA glycosylase superfamily protein
Conserved	ptc-miR172c	Potri.015G135600	Potri.012G144900;Potri.012G133500	0	MATE efflux family protein
Conserved	ptc-miR172c	Potri.012G133500	Potri.015G135600;Potri.015G147600	0	MATE efflux family protein
Conserved	ptc-miR172c	Potri.004G089800	Potri.017G125200	RGA,RGA1	GRAS family transcription factor family protein
Conserved	ptc-miR172c	Potri.015G071500	Potri.012G076700	0	Gibberellin-regulated family protein
Conserved	ptc-miR172f	Potri.007G046200	Potri.005G140700	AP2,FL1,FLO2	Integrase-type DNA-binding superfamily protein
Conserved	ptc-miR172f	Potri.005G254000	Potri.002G007200	ATIRE1-1,IRE1-1	inositol requiring 1-1
Conserved	ptc-miR172f	Potri.016G039000	Potri.006G042100	3-Oct,ATOCT3	organic cation/carnitine transporter 3
Conserved	ptc-miR172f	Potri.003G183000	Potri.001G043900	ATCNGC8,CNGC8	cyclic nucleotide gated channel 8
Conserved	ptc-miR172f	Potri.006G175500	Potri.018G097700	ATTPS11,ATTPSB,TPS11	trehalose phosphatase/synthase 11
Conserved	ptc-miR172f	Potri.010G137300	Potri.008G112300	0	DNA glycosylase superfamily protein
Conserved	ptc-miR172f	Potri.015G135600	Potri.012G144900;Potri.012G133500	0	MATE efflux family protein
Conserved	ptc-miR172f	Potri.012G133500	Potri.015G135600;Potri.015G147600	0	MATE efflux family protein
Conserved	ptc-miR172f	Potri.004G089800	Potri.017G125200	RGA,RGA1	GRAS family transcription factor family protein
Conserved	ptc-miR172f	Potri.015G071500	Potri.012G076700	0	Gibberellin-regulated family protein
Conserved	ptc-miR319a	Potri.004G157700	Potri.009G119500	0	Sec14p-like phosphatidylinositol transfer family protein
Conserved	ptc-miR319a	Potri.007G132700	Potri.017G023300	0	Protein of unknown function (DUF3755)
Conserved	ptc-miR319a	Potri.013G040600	Potri.005G053000	GME	GDP-D-mannose 3\',5\'-epimerase
Conserved	ptc-miR319a	Potri.005G053000	Potri.013G040600	GME	GDP-D-mannose 3\',5\'-epimerase
Conserved	ptc-miR319a	Potri.019G083700	Potri.013G113100	0	DNAJ heat shock N-terminal domain-containing protein
Conserved	ptc-miR319a	Potri.017G025900	Potri.007G132000	SGR7,SHR	GRAS family transcription factor
Conserved	ptc-miR319a	Potri.016G105900	Potri.006G094000	0	RING/FYVE/PHD zinc finger superfamily protein
Conserved	ptc-miR319a	Potri.003G082800	Potri.001G151700	GATA26	GATA transcription factor 26
Conserved	ptc-miR319a	Potri.009G164400	Potri.004G203500	0	0
Conserved	ptc-miR319b	Potri.004G157700	Potri.009G119500	0	Sec14p-like phosphatidylinositol transfer family protein
Conserved	ptc-miR319b	Potri.007G132700	Potri.017G023300	0	Protein of unknown function (DUF3755)
Conserved	ptc-miR319b	Potri.013G040600	Potri.005G053000	GME	GDP-D-mannose 3\',5\'-epimerase
Conserved	ptc-miR319b	Potri.005G053000	Potri.013G040600	GME	GDP-D-mannose 3\',5\'-epimerase
Conserved	ptc-miR319b	Potri.019G083700	Potri.013G113100	0	DNAJ heat shock N-terminal domain-containing protein
Conserved	ptc-miR319b	Potri.017G025900	Potri.007G132000	SGR7,SHR	GRAS family transcription factor
Conserved	ptc-miR319b	Potri.016G105900	Potri.006G094000	0	RING/FYVE/PHD zinc finger superfamily protein
Conserved	ptc-miR319b	Potri.003G082800	Potri.001G151700	GATA26	GATA transcription factor 26
Conserved	ptc-miR319b	Potri.009G164400	Potri.004G203500	0	0
Conserved	ptc-miR319e	Potri.019G083700	Potri.013G113100	0	DNAJ heat shock N-terminal domain-containing protein
Conserved	ptc-miR319e	Potri.013G040600	Potri.005G053000	GME	GDP-D-mannose 3\',5\'-epimerase
Conserved	ptc-miR319e	Potri.005G053000	Potri.013G040600	GME	GDP-D-mannose 3\',5\'-epimerase
Conserved	ptc-miR319e	Potri.004G157700	Potri.009G119500	0	Sec14p-like phosphatidylinositol transfer family protein
Conserved	ptc-miR319e	Potri.009G164400	Potri.004G203500	0	0
Conserved	ptc-miR319e	Potri.007G132700	Potri.017G023300	0	Protein of unknown function (DUF3755)
Conserved	ptc-miR319e	Potri.017G025900	Potri.007G132000	SGR7,SHR	GRAS family transcription factor
Conserved	ptc-miR319e	Potri.016G105900	Potri.006G094000	0	RING/FYVE/PHD zinc finger superfamily protein
Conserved	ptc-miR319e	Potri.003G082800	Potri.001G151700	GATA26	GATA transcription factor 26
Conserved	ptc-miR319f	Potri.013G040600	Potri.005G053000	GME	GDP-D-mannose 3\',5\'-epimerase
Conserved	ptc-miR319f	Potri.005G053000	Potri.013G040600	GME	GDP-D-mannose 3\',5\'-epimerase
Conserved	ptc-miR319f	Potri.019G083700	Potri.013G113100	0	DNAJ heat shock N-terminal domain-containing protein
Conserved	ptc-miR319f	Potri.009G164400	Potri.004G203500	0	0
Conserved	ptc-miR319f	Potri.004G157700	Potri.009G119500	0	Sec14p-like phosphatidylinositol transfer family protein
Conserved	ptc-miR319f	Potri.003G082800	Potri.001G151700	GATA26	GATA transcription factor 26
Conserved	ptc-miR319f	Potri.007G132700	Potri.017G023300	0	Protein of unknown function (DUF3755)
Conserved	ptc-miR319g	Potri.013G040600	Potri.005G053000	GME	GDP-D-mannose 3\',5\'-epimerase
Conserved	ptc-miR319g	Potri.005G053000	Potri.013G040600	GME	GDP-D-mannose 3\',5\'-epimerase
Conserved	ptc-miR319g	Potri.019G083700	Potri.013G113100	0	DNAJ heat shock N-terminal domain-containing protein
Conserved	ptc-miR319g	Potri.009G164400	Potri.004G203500	0	0
Conserved	ptc-miR319g	Potri.004G157700	Potri.009G119500	0	Sec14p-like phosphatidylinositol transfer family protein
Conserved	ptc-miR319g	Potri.003G082800	Potri.001G151700	GATA26	GATA transcription factor 26
Conserved	ptc-miR319g	Potri.007G132700	Potri.017G023300	0	Protein of unknown function (DUF3755)
Conserved	ptc-miR319h	Potri.019G083700	Potri.013G113100	0	DNAJ heat shock N-terminal domain-containing protein
Conserved	ptc-miR319h	Potri.013G040600	Potri.005G053000	GME	GDP-D-mannose 3\',5\'-epimerase
Conserved	ptc-miR319h	Potri.005G053000	Potri.013G040600	GME	GDP-D-mannose 3\',5\'-epimerase
Conserved	ptc-miR319h	Potri.004G157700	Potri.009G119500	0	Sec14p-like phosphatidylinositol transfer family protein
Conserved	ptc-miR319h	Potri.009G164400	Potri.004G203500	0	0
Conserved	ptc-miR319h	Potri.007G132700	Potri.017G023300	0	Protein of unknown function (DUF3755)
Conserved	ptc-miR319h	Potri.017G025900	Potri.007G132000	SGR7,SHR	GRAS family transcription factor
Conserved	ptc-miR319h	Potri.016G105900	Potri.006G094000	0	RING/FYVE/PHD zinc finger superfamily protein
Conserved	ptc-miR319h	Potri.003G082800	Potri.001G151700	GATA26	GATA transcription factor 26
Conserved	ptc-miR319i	Potri.014G135300	Potri.019G133400	ARF1-BP,ARF2,HSS,ORE14	auxin response factor 2
Conserved	ptc-miR319i	Potri.006G031200	Potri.016G028200	0	0
Conserved	ptc-miR319i	Potri.014G058800	Potri.002G143000	0	transcription regulators
Conserved	ptc-miR319i	Potri.013G115600	Potri.019G086100	0	MATE efflux family protein
Conserved	ptc-miR319i	Potri.010G157700	Potri.008G096900	0	Asparagine synthase family protein
Conserved	ptc-miR319i	Potri.010G069100	Potri.008G169300	ATFAO3,FAO3	fatty alcohol oxidase 3
Conserved	ptc-miR319i	Potri.016G105900	Potri.006G094000	0	RING/FYVE/PHD zinc finger superfamily protein
Conserved	ptc-miR319i	Potri.005G201100	Potri.002G060600	0	haloacid dehalogenase (HAD) superfamily protein
Conserved	ptc-miR319i	Potri.002G049700	Potri.005G213200	0	Protein kinase superfamily protein
Conserved	ptc-miR3627a	Potri.008G159100	Potri.010G081100	0	ATPase E1-E2 type family protein / haloacid dehalogenase-like hydrolase family protein
Conserved	ptc-miR3627a	Potri.009G092200	Potri.001G297400	0	SWIB/MDM2 domain superfamily protein
Conserved	ptc-miR3627a	Potri.006G247100	Potri.018G034400	0	Protein phosphatase 2A regulatory B subunit family protein
Conserved	ptc-miR3627a	Potri.006G232700	Potri.018G059800	0	Protein phosphatase 2C family protein
Conserved	ptc-miR3627a	Potri.015G055200	Potri.012G057300	ATPK3,PK3	serine/threonine protein kinase 3
Conserved	ptc-miR3627a	Potri.006G040900	Potri.016G037700	SSL2	strictosidine synthase-like 2
Conserved	ptc-miR390a	Potri.016G055400	Potri.006G051700	0	Leucine-rich repeat protein kinase family protein
Conserved	ptc-miR390a	Potri.006G051700	Potri.016G055400	0	Leucine-rich repeat protein kinase family protein
Conserved	ptc-miR390a	Potri.001G053400	Potri.003G174900	0	Leucine-rich repeat receptor-like protein kinase family protein
Conserved	ptc-miR390a	Potri.016G024900	Potri.006G027200	SIP2,SIP2;1	small and basic intrinsic protein 2;1
Conserved	ptc-miR390a	Potri.003G194000	Potri.001G031700	AtHPR1,AtTHO1,HPR1,THO1	nuclear matrix protein-related
Conserved	ptc-miR390a	Potri.001G325100	Potri.017G063300	ANAC083,NAC083,VNI2	NAC domain containing protein 83
Conserved	ptc-miR390a	Potri.008G004100	Potri.010G253600	0	Mitochondrial substrate carrier family protein
Conserved	ptc-miR390a	Potri.002G251700	Potri.014G195200	TMKL1	transmembrane kinase-like 1
Conserved	ptc-miR390a	Potri.013G064300	Potri.019G039000	0	Leucine-rich repeat protein kinase family protein
Conserved	ptc-miR390b	Potri.016G055400	Potri.006G051700	0	Leucine-rich repeat protein kinase family protein
Conserved	ptc-miR390b	Potri.006G051700	Potri.016G055400	0	Leucine-rich repeat protein kinase family protein
Conserved	ptc-miR390b	Potri.001G053400	Potri.003G174900	0	Leucine-rich repeat receptor-like protein kinase family protein
Conserved	ptc-miR390b	Potri.016G024900	Potri.006G027200	SIP2,SIP2;1	small and basic intrinsic protein 2;1
Conserved	ptc-miR390b	Potri.003G194000	Potri.001G031700	AtHPR1,AtTHO1,HPR1,THO1	nuclear matrix protein-related
Conserved	ptc-miR390b	Potri.001G325100	Potri.017G063300	ANAC083,NAC083,VNI2	NAC domain containing protein 83
Conserved	ptc-miR390b	Potri.008G004100	Potri.010G253600	0	Mitochondrial substrate carrier family protein
Conserved	ptc-miR390b	Potri.002G251700	Potri.014G195200	TMKL1	transmembrane kinase-like 1
Conserved	ptc-miR390b	Potri.013G064300	Potri.019G039000	0	Leucine-rich repeat protein kinase family protein
Conserved	ptc-miR390c	Potri.016G055400	Potri.006G051700	0	Leucine-rich repeat protein kinase family protein
Conserved	ptc-miR390c	Potri.006G051700	Potri.016G055400	0	Leucine-rich repeat protein kinase family protein
Conserved	ptc-miR390c	Potri.001G053400	Potri.003G174900	0	Leucine-rich repeat receptor-like protein kinase family protein
Conserved	ptc-miR390c	Potri.016G024900	Potri.006G027200	SIP2,SIP2;1	small and basic intrinsic protein 2;1
Conserved	ptc-miR390c	Potri.003G194000	Potri.001G031700	AtHPR1,AtTHO1,HPR1,THO1	nuclear matrix protein-related
Conserved	ptc-miR390c	Potri.001G325100	Potri.017G063300	ANAC083,NAC083,VNI2	NAC domain containing protein 83
Conserved	ptc-miR390c	Potri.008G004100	Potri.010G253600	0	Mitochondrial substrate carrier family protein
Conserved	ptc-miR390c	Potri.002G251700	Potri.014G195200	TMKL1	transmembrane kinase-like 1
Conserved	ptc-miR390c	Potri.013G064300	Potri.019G039000	0	Leucine-rich repeat protein kinase family protein
Conserved	ptc-miR390d	Potri.016G055400	Potri.006G051700	0	Leucine-rich repeat protein kinase family protein
Conserved	ptc-miR390d	Potri.006G051700	Potri.016G055400	0	Leucine-rich repeat protein kinase family protein
Conserved	ptc-miR390d	Potri.001G053400	Potri.003G174900	0	Leucine-rich repeat receptor-like protein kinase family protein
Conserved	ptc-miR390d	Potri.016G024900	Potri.006G027200	SIP2,SIP2;1	small and basic intrinsic protein 2;1
Conserved	ptc-miR390d	Potri.003G194000	Potri.001G031700	AtHPR1,AtTHO1,HPR1,THO1	nuclear matrix protein-related
Conserved	ptc-miR390d	Potri.001G325100	Potri.017G063300	ANAC083,NAC083,VNI2	NAC domain containing protein 83
Conserved	ptc-miR390d	Potri.008G004100	Potri.010G253600	0	Mitochondrial substrate carrier family protein
Conserved	ptc-miR390d	Potri.002G251700	Potri.014G195200	TMKL1	transmembrane kinase-like 1
Conserved	ptc-miR390d	Potri.013G064300	Potri.019G039000	0	Leucine-rich repeat protein kinase family protein
Conserved	ptc-miR393a	Potri.004G038500	Potri.011G047200	0	0
Conserved	ptc-miR393a	Potri.010G209300	Potri.008G051300	0	0
Conserved	ptc-miR393a	Potri.001G387600	Potri.011G107900	0	SecY protein transport family protein
Conserved	ptc-miR393a	Potri.011G042400	Potri.004G033900	TIR1	F-box/RNI-like superfamily protein
Conserved	ptc-miR393a	Potri.005G206300	Potri.002G056200	0	Ribosomal protein L7Ae/L30e/S12e/Gadd45 family protein
Conserved	ptc-miR393b	Potri.004G038500	Potri.011G047200	0	0
Conserved	ptc-miR393b	Potri.010G209300	Potri.008G051300	0	0
Conserved	ptc-miR393b	Potri.001G387600	Potri.011G107900	0	SecY protein transport family protein
Conserved	ptc-miR393b	Potri.011G042400	Potri.004G033900	TIR1	F-box/RNI-like superfamily protein
Conserved	ptc-miR393b	Potri.005G206300	Potri.002G056200	0	Ribosomal protein L7Ae/L30e/S12e/Gadd45 family protein
Conserved	ptc-miR393c	Potri.010G209300	Potri.008G051300	0	0
Conserved	ptc-miR393c	Potri.001G387600	Potri.011G107900	0	SecY protein transport family protein
Conserved	ptc-miR393c	Potri.004G038500	Potri.011G047200	0	0
Conserved	ptc-miR393c	Potri.011G042400	Potri.004G033900	TIR1	F-box/RNI-like superfamily protein
Conserved	ptc-miR393c	Potri.005G206300	Potri.002G056200	0	Ribosomal protein L7Ae/L30e/S12e/Gadd45 family protein
Conserved	ptc-miR394a	Potri.003G070400	Potri.001G164900	0	0
Conserved	ptc-miR394a	Potri.002G169700	Potri.014G097200	0	nucleotidyltransferases
Conserved	ptc-miR394a	Potri.014G145700	Potri.002G236800	CARAB-AK-LYS	Aspartate kinase family protein
Conserved	ptc-miR394a	Potri.015G047400	Potri.012G056700	0	P-loop nucleoside triphosphate hydrolases superfamily protein with CH (Calponin Homology) domain
Conserved	ptc-miR394a	Potri.015G020400	Potri.012G000900	0	nucleotidyltransferases
Conserved	ptc-miR394a	Potri.T061800	Potri.001G330400	0	0
Conserved	ptc-miR394a	Potri.006G016900	Potri.016G008800	0	Uncharacterised protein family (UPF0497)
Conserved	ptc-miR394a	Potri.016G008800	Potri.006G016900	0	Uncharacterised protein family (UPF0497)
Conserved	ptc-miR394a	Potri.014G022400	Potri.002G122500	0	MRG family protein
Conserved	ptc-miR394a	Potri.016G087800	Potri.006G130000	0	Concanavalin A-like lectin protein kinase family protein
Conserved	ptc-miR394a	Potri.005G124700	Potri.007G027500	0	Leucine-rich repeat (LRR) family protein
Conserved	ptc-miR394a	Potri.009G009800	Potri.004G213000	BLH8,PNF	BEL1-like homeodomain 8
Conserved	ptc-miR394a	Potri.009G165900	Potri.004G205000	PUB15	Plant U-Box 15
Conserved	ptc-miR394b	Potri.003G070400	Potri.001G164900	0	0
Conserved	ptc-miR394b	Potri.002G169700	Potri.014G097200	0	nucleotidyltransferases
Conserved	ptc-miR394b	Potri.014G145700	Potri.002G236800	CARAB-AK-LYS	Aspartate kinase family protein
Conserved	ptc-miR394b	Potri.015G047400	Potri.012G056700	0	P-loop nucleoside triphosphate hydrolases superfamily protein with CH (Calponin Homology) domain
Conserved	ptc-miR394b	Potri.015G020400	Potri.012G000900	0	nucleotidyltransferases
Conserved	ptc-miR394b	Potri.T061800	Potri.001G330400	0	0
Conserved	ptc-miR394b	Potri.006G016900	Potri.016G008800	0	Uncharacterised protein family (UPF0497)
Conserved	ptc-miR394b	Potri.016G008800	Potri.006G016900	0	Uncharacterised protein family (UPF0497)
Conserved	ptc-miR394b	Potri.014G022400	Potri.002G122500	0	MRG family protein
Conserved	ptc-miR394b	Potri.016G087800	Potri.006G130000	0	Concanavalin A-like lectin protein kinase family protein
Conserved	ptc-miR394b	Potri.005G124700	Potri.007G027500	0	Leucine-rich repeat (LRR) family protein
Conserved	ptc-miR394b	Potri.009G009800	Potri.004G213000	BLH8,PNF	BEL1-like homeodomain 8
Conserved	ptc-miR394b	Potri.009G165900	Potri.004G205000	PUB15	Plant U-Box 15
Conserved	ptc-miR395a	Potri.001G172600	Potri.003G061400	0	Single hybrid motif superfamily protein
Conserved	ptc-miR395a	Potri.002G157300	Potri.014G080900	0	GATA type zinc finger transcription factor family protein
Conserved	ptc-miR395a	Potri.003G077500	Potri.001G157400	0	O-fucosyltransferase family protein
Conserved	ptc-miR395a	Potri.014G152200	Potri.002G230000;Potri.002G229900	ATGLR3.4,GLR3.4,GLUR3	glutamate receptor 3.4
Conserved	ptc-miR395a	Potri.001G359700	Potri.011G092700	TOP1,TOP1BETA	DNA topoisomerase 1 beta
Conserved	ptc-miR395a	Potri.005G131200	Potri.007G035200	ATXLG1,XLG1	extra-large G-protein 1
Conserved	ptc-miR395a	Potri.003G168700	Potri.001G059100	0	0
Conserved	ptc-miR395a	Potri.018G102400	Potri.006G179900	HHP2	heptahelical transmembrane protein2
Conserved	ptc-miR395a	Potri.002G081400	Potri.005G179900	0	Eukaryotic aspartyl protease family protein
Conserved	ptc-miR395a	Potri.001G009600	Potri.003G215900	CMT3	chromomethylase 3
Conserved	ptc-miR395a	Potri.008G032800	Potri.010G228700	KTF1,SPT5L	kow domain-containing transcription factor 1
Conserved	ptc-miR395a	Potri.010G230000	Potri.008G031700	0	lactate/malate dehydrogenase family protein
Conserved	ptc-miR395a	Potri.010G229200	Potri.008G032500	0	Protein of unknown function (DUF1635)
Conserved	ptc-miR395a	Potri.008G119800	Potri.010G126000	0	0
Conserved	ptc-miR395b	Potri.008G136500	Potri.010G104500	ATTPS6,TPS6	UDP-Glycosyltransferase / trehalose-phosphatase family protein
Conserved	ptc-miR395b	Potri.012G001400	Potri.015G020000	ANAC100,ATNAC5,NAC100	NAC domain containing protein 100
Conserved	ptc-miR395b	Potri.008G031200	Potri.010G230300	0	Galactose oxidase/kelch repeat superfamily protein
Conserved	ptc-miR395b	Potri.009G028600	Potri.001G237300	0	0
Conserved	ptc-miR395b	Potri.005G131200	Potri.007G035200	ATXLG1,XLG1	extra-large G-protein 1
Conserved	ptc-miR395b	Potri.015G031800	Potri.012G041900	ANN5,ANNAT5	annexin 5
Conserved	ptc-miR395b	Potri.007G108900	Potri.005G059800	0	0
Conserved	ptc-miR395b	Potri.014G118400	Potri.002G193700	AtSTS,STS	stachyose synthase
Conserved	ptc-miR395b	Potri.009G017700	Potri.001G216600	LHW	transcription factor-related
Conserved	ptc-miR395b	Potri.008G186000	Potri.010G046900	0	beta-1,4-N-acetylglucosaminyltransferase family protein
Conserved	ptc-miR395b	Potri.013G010700	Potri.005G020200	0	Calmodulin-binding protein
Conserved	ptc-miR395b	Potri.006G057900	Potri.016G049800	CYP712A1	cytochrome P450, family 712, subfamily A, polypeptide 1
Conserved	ptc-miR395e	Potri.008G136500	Potri.010G104500	ATTPS6,TPS6	UDP-Glycosyltransferase / trehalose-phosphatase family protein
Conserved	ptc-miR395e	Potri.012G001400	Potri.015G020000	ANAC100,ATNAC5,NAC100	NAC domain containing protein 100
Conserved	ptc-miR395e	Potri.008G031200	Potri.010G230300	0	Galactose oxidase/kelch repeat superfamily protein
Conserved	ptc-miR395e	Potri.009G028600	Potri.001G237300	0	0
Conserved	ptc-miR395e	Potri.005G131200	Potri.007G035200	ATXLG1,XLG1	extra-large G-protein 1
Conserved	ptc-miR395e	Potri.015G031800	Potri.012G041900	ANN5,ANNAT5	annexin 5
Conserved	ptc-miR395e	Potri.007G108900	Potri.005G059800	0	0
Conserved	ptc-miR395e	Potri.014G118400	Potri.002G193700	AtSTS,STS	stachyose synthase
Conserved	ptc-miR395e	Potri.009G017700	Potri.001G216600	LHW	transcription factor-related
Conserved	ptc-miR395e	Potri.008G186000	Potri.010G046900	0	beta-1,4-N-acetylglucosaminyltransferase family protein
Conserved	ptc-miR395e	Potri.013G010700	Potri.005G020200	0	Calmodulin-binding protein
Conserved	ptc-miR395e	Potri.006G057900	Potri.016G049800	CYP712A1	cytochrome P450, family 712, subfamily A, polypeptide 1
Conserved	ptc-miR395f	Potri.008G136500	Potri.010G104500	ATTPS6,TPS6	UDP-Glycosyltransferase / trehalose-phosphatase family protein
Conserved	ptc-miR395f	Potri.012G001400	Potri.015G020000	ANAC100,ATNAC5,NAC100	NAC domain containing protein 100
Conserved	ptc-miR395f	Potri.008G031200	Potri.010G230300	0	Galactose oxidase/kelch repeat superfamily protein
Conserved	ptc-miR395f	Potri.009G028600	Potri.001G237300	0	0
Conserved	ptc-miR395f	Potri.005G131200	Potri.007G035200	ATXLG1,XLG1	extra-large G-protein 1
Conserved	ptc-miR395f	Potri.015G031800	Potri.012G041900	ANN5,ANNAT5	annexin 5
Conserved	ptc-miR395f	Potri.007G108900	Potri.005G059800	0	0
Conserved	ptc-miR395f	Potri.014G118400	Potri.002G193700	AtSTS,STS	stachyose synthase
Conserved	ptc-miR395f	Potri.009G017700	Potri.001G216600	LHW	transcription factor-related
Conserved	ptc-miR395f	Potri.008G186000	Potri.010G046900	0	beta-1,4-N-acetylglucosaminyltransferase family protein
Conserved	ptc-miR395f	Potri.013G010700	Potri.005G020200	0	Calmodulin-binding protein
Conserved	ptc-miR395f	Potri.006G057900	Potri.016G049800	CYP712A1	cytochrome P450, family 712, subfamily A, polypeptide 1
Conserved	ptc-miR395k	Potri.008G136500	Potri.010G104500	ATTPS6,TPS6	UDP-Glycosyltransferase / trehalose-phosphatase family protein
Conserved	ptc-miR395k	Potri.012G001400	Potri.015G020000	ANAC100,ATNAC5,NAC100	NAC domain containing protein 100
Conserved	ptc-miR395k	Potri.008G031200	Potri.010G230300	0	Galactose oxidase/kelch repeat superfamily protein
Conserved	ptc-miR395k	Potri.009G028600	Potri.001G237300	0	0
Conserved	ptc-miR395k	Potri.005G131200	Potri.007G035200	ATXLG1,XLG1	extra-large G-protein 1
Conserved	ptc-miR395k	Potri.015G031800	Potri.012G041900	ANN5,ANNAT5	annexin 5
Conserved	ptc-miR395k	Potri.007G108900	Potri.005G059800	0	0
Conserved	ptc-miR395k	Potri.014G118400	Potri.002G193700	AtSTS,STS	stachyose synthase
Conserved	ptc-miR395k	Potri.009G017700	Potri.001G216600	LHW	transcription factor-related
Conserved	ptc-miR395k	Potri.008G186000	Potri.010G046900	0	beta-1,4-N-acetylglucosaminyltransferase family protein
Conserved	ptc-miR395k	Potri.013G010700	Potri.005G020200	0	Calmodulin-binding protein
Conserved	ptc-miR395k	Potri.006G057900	Potri.016G049800	CYP712A1	cytochrome P450, family 712, subfamily A, polypeptide 1
Conserved	ptc-miR396a	Potri.007G047600	Potri.005G141600	0	Granulin repeat cysteine protease family protein
Conserved	ptc-miR396a	Potri.005G141600	Potri.007G047600	RD21,RD21A	Granulin repeat cysteine protease family protein
Conserved	ptc-miR396a	Potri.001G017100	Potri.003G207500;Potri.003G207400	0	0
Conserved	ptc-miR396a	Potri.019G052600	Potri.013G087100	0	Cystathionine beta-synthase (CBS) family protein
Conserved	ptc-miR396a	Potri.005G033700	Potri.013G023100	emb2473,MIRO1	MIRO-related GTP-ase 1
Conserved	ptc-miR396a	Potri.007G090400	Potri.005G077600	ACX2,ATACX2	acyl-CoA oxidase 2
Conserved	ptc-miR396a	Potri.003G089600	Potri.001G144600	0	pentatricopeptide (PPR) repeat-containing protein
Conserved	ptc-miR396a	Potri.012G002100	Potri.015G019200	0	Protein phosphatase 2C family protein
Conserved	ptc-miR396a	Potri.002G195800	Potri.014G120200	TBL6	TRICHOME BIREFRINGENCE-LIKE 6
Conserved	ptc-miR396a	Potri.001G466800	Potri.011G164400	0	myosin heavy chain-related
Conserved	ptc-miR396a	Potri.011G164400	Potri.001G466800	0	myosin heavy chain-related
Conserved	ptc-miR396a	Potri.005G240200	Potri.002G021500	ROC3	rotamase CYP 3
Conserved	ptc-miR396a	Potri.002G232600	Potri.014G149600	SAD2,URM9	ARM repeat superfamily protein
Conserved	ptc-miR396b	Potri.007G047600	Potri.005G141600	0	Granulin repeat cysteine protease family protein
Conserved	ptc-miR396b	Potri.005G141600	Potri.007G047600	RD21,RD21A	Granulin repeat cysteine protease family protein
Conserved	ptc-miR396b	Potri.001G017100	Potri.003G207500;Potri.003G207400	0	0
Conserved	ptc-miR396b	Potri.019G052600	Potri.013G087100	0	Cystathionine beta-synthase (CBS) family protein
Conserved	ptc-miR396b	Potri.005G033700	Potri.013G023100	emb2473,MIRO1	MIRO-related GTP-ase 1
Conserved	ptc-miR396b	Potri.007G090400	Potri.005G077600	ACX2,ATACX2	acyl-CoA oxidase 2
Conserved	ptc-miR396b	Potri.003G089600	Potri.001G144600	0	pentatricopeptide (PPR) repeat-containing protein
Conserved	ptc-miR396b	Potri.012G002100	Potri.015G019200	0	Protein phosphatase 2C family protein
Conserved	ptc-miR396b	Potri.002G195800	Potri.014G120200	TBL6	TRICHOME BIREFRINGENCE-LIKE 6
Conserved	ptc-miR396b	Potri.001G466800	Potri.011G164400	0	myosin heavy chain-related
Conserved	ptc-miR396b	Potri.011G164400	Potri.001G466800	0	myosin heavy chain-related
Conserved	ptc-miR396b	Potri.005G240200	Potri.002G021500	ROC3	rotamase CYP 3
Conserved	ptc-miR396b	Potri.002G232600	Potri.014G149600	SAD2,URM9	ARM repeat superfamily protein
Conserved	ptc-miR396c	Potri.007G047600	Potri.005G141600	0	Granulin repeat cysteine protease family protein
Conserved	ptc-miR396c	Potri.005G141600	Potri.007G047600	RD21,RD21A	Granulin repeat cysteine protease family protein
Conserved	ptc-miR396c	Potri.007G090400	Potri.005G077600	ACX2,ATACX2	acyl-CoA oxidase 2
Conserved	ptc-miR396c	Potri.003G089600	Potri.001G144600	0	pentatricopeptide (PPR) repeat-containing protein
Conserved	ptc-miR396c	Potri.005G033700	Potri.013G023100	emb2473,MIRO1	MIRO-related GTP-ase 1
Conserved	ptc-miR396c	Potri.001G017100	Potri.003G207500;Potri.003G207400	0	0
Conserved	ptc-miR396c	Potri.019G052600	Potri.013G087100	0	Cystathionine beta-synthase (CBS) family protein
Conserved	ptc-miR396e	Potri.007G047600	Potri.005G141600	0	Granulin repeat cysteine protease family protein
Conserved	ptc-miR396e	Potri.005G141600	Potri.007G047600	RD21,RD21A	Granulin repeat cysteine protease family protein
Conserved	ptc-miR396e	Potri.001G017100	Potri.003G207500;Potri.003G207400	0	0
Conserved	ptc-miR396e	Potri.019G052600	Potri.013G087100	0	Cystathionine beta-synthase (CBS) family protein
Conserved	ptc-miR396e	Potri.005G033700	Potri.013G023100	emb2473,MIRO1	MIRO-related GTP-ase 1
Conserved	ptc-miR396e	Potri.007G090400	Potri.005G077600	ACX2,ATACX2	acyl-CoA oxidase 2
Conserved	ptc-miR396e	Potri.003G089600	Potri.001G144600	0	pentatricopeptide (PPR) repeat-containing protein
Conserved	ptc-miR396e	Potri.012G002100	Potri.015G019200	0	Protein phosphatase 2C family protein
Conserved	ptc-miR396e	Potri.002G195800	Potri.014G120200	TBL6	TRICHOME BIREFRINGENCE-LIKE 6
Conserved	ptc-miR396e	Potri.001G466800	Potri.011G164400	0	myosin heavy chain-related
Conserved	ptc-miR396e	Potri.011G164400	Potri.001G466800	0	myosin heavy chain-related
Conserved	ptc-miR396e	Potri.005G240200	Potri.002G021500	ROC3	rotamase CYP 3
Conserved	ptc-miR396e	Potri.002G232600	Potri.014G149600	SAD2,URM9	ARM repeat superfamily protein
Conserved	ptc-miR396f	Potri.002G115100	Potri.014G012800	AtGRF1,GRF1	growth-regulating factor 1
Conserved	ptc-miR396f	Potri.014G012800	Potri.002G115100	AtGRF1,GRF1	growth-regulating factor 1
Conserved	ptc-miR396f	Potri.001G116300	Potri.003G116100	0	Tetratricopeptide repeat (TPR)-like superfamily protein
Conserved	ptc-miR396f	Potri.015G092000	Potri.012G094500	MLS	malate synthase
Conserved	ptc-miR396f	Potri.019G052600	Potri.013G087100	0	Cystathionine beta-synthase (CBS) family protein
Conserved	ptc-miR396f	Potri.007G090400	Potri.005G077600	ACX2,ATACX2	acyl-CoA oxidase 2
Conserved	ptc-miR396f	Potri.010G096500	Potri.008G145600	0	Threonyl-tRNA synthetase
Conserved	ptc-miR396f	Potri.001G123900	Potri.003G109500	0	0
Conserved	ptc-miR396f	Potri.012G082000	Potri.015G077700	AtMYB98,MYB98	myb domain protein 98
Conserved	ptc-miR396f	Potri.002G047500	Potri.005G215600	0	ATPase E1-E2 type family protein / haloacid dehalogenase-like hydrolase family protein
Conserved	ptc-miR396g	Potri.002G115100	Potri.014G012800	AtGRF1,GRF1	growth-regulating factor 1
[truncated: 3,933 more rows]
